# Supplementary material
Source: PubMed Central journal article supplement (PMC6644385)
Supplement: ao8b02009_si_001.pdf [file ao8b02009_si_001.pdf]

*Supporting Information*

**Palladium-catalyzed ortho C–H Arylation of Aniline  
Carbamates with Diazonium Salts under Mild Condition:  
Expedient Synthesis of Carbazole Alkaloids**

Arghya Polley,<sup>†,‡</sup> Kasarla Varalaxmi<sup>†,§</sup> and Ranjan Jana<sup>\*,†,‡</sup>

<sup>†</sup>Organic and Medicinal Chemistry Division, CSIR-Indian Institute of Chemical Biology

4 Raja S. C. Mullick Road, Jadavpur, Kolkata-700032, West Bengal, India

<sup>‡</sup>Academy of Scientific and Innovative Research (AcSIR), Kolkata-700032, West Bengal, India

<sup>§</sup>National Institute of Pharmaceutical Education and Research, Kolkata-700054, West Bengal,  
India

E-mail: rjana@iicb.res.in

# Table of Contents

1. Attempted conditions for de-methylation of O-Methylmahanine page S3
2.  $^1\text{H}$  and  $^{13}\text{C}$  NMR spectra of all compounds.....page S4-S43
3.  $^1\text{H}$  NMR spectra of kinetic study.....page S44
4. GC MS spectra of tempo-adduct product.....page S44-S45
5. References.....page S45

**Table S 1:** Attempted conditions for de-methylation of O-Methylmahanine

| Entry          | Conditions                                   | Time   | Results     |
|----------------|----------------------------------------------|--------|-------------|
| 1 <sup>1</sup> | BBr <sub>3</sub> , DCM, -78 °C ~rt           | 30 min | Decomposed  |
| 2 <sup>2</sup> | TMSCl, NaI, CH <sub>3</sub> CN, rt           | 45 min | Decomposed  |
| 3 <sup>3</sup> | BF <sub>3</sub> -Et <sub>2</sub> O, DMS, 0°C | 30 min | Decomposed  |
| 4 <sup>4</sup> | Trimethyliodosilane, DCM, rt                 | 45 min | Decomposed  |
| 5 <sup>5</sup> | AlCl <sub>3</sub> in benzene, reflux,        | 24 h   | No reaction |
| 6 <sup>6</sup> | AlI <sub>3</sub> , pyridine, MeCN            | 24 h   | No reaction |

# Scheme S1: $^1\text{H}$ NMR and $^{13}\text{C}$ NMR Spectra of all compounds

## $^1\text{H}$ NMR and $^{13}\text{C}$ NMR Spectra of compound 3a

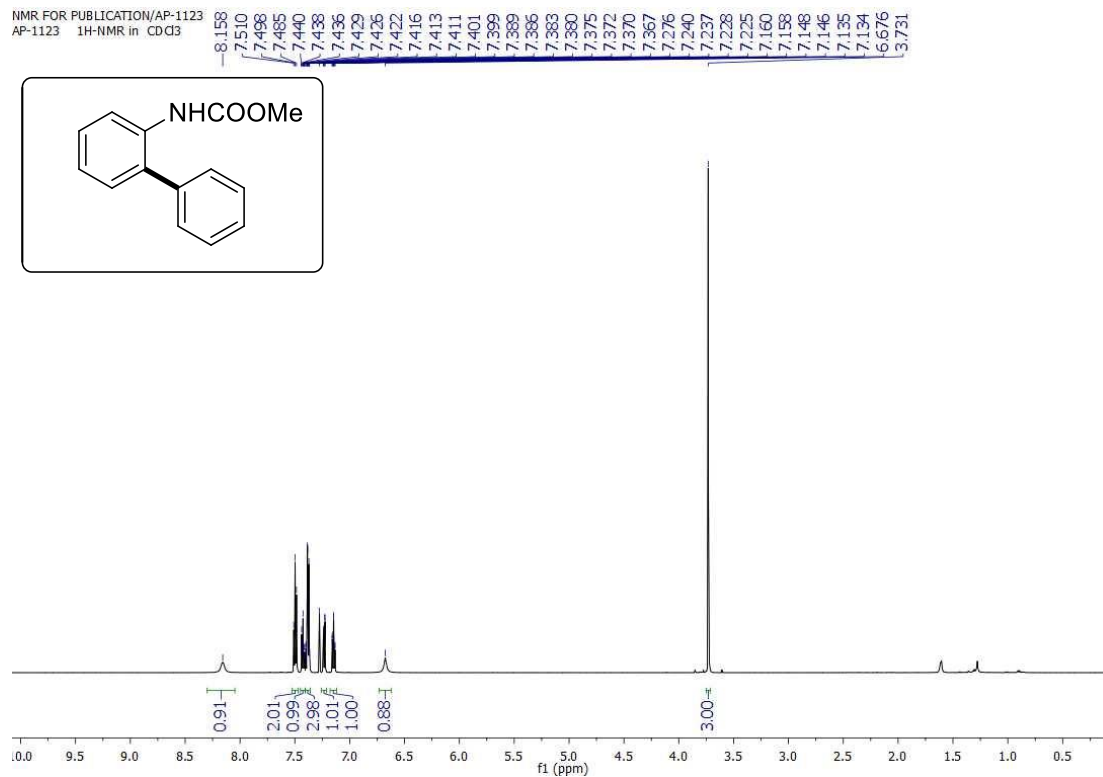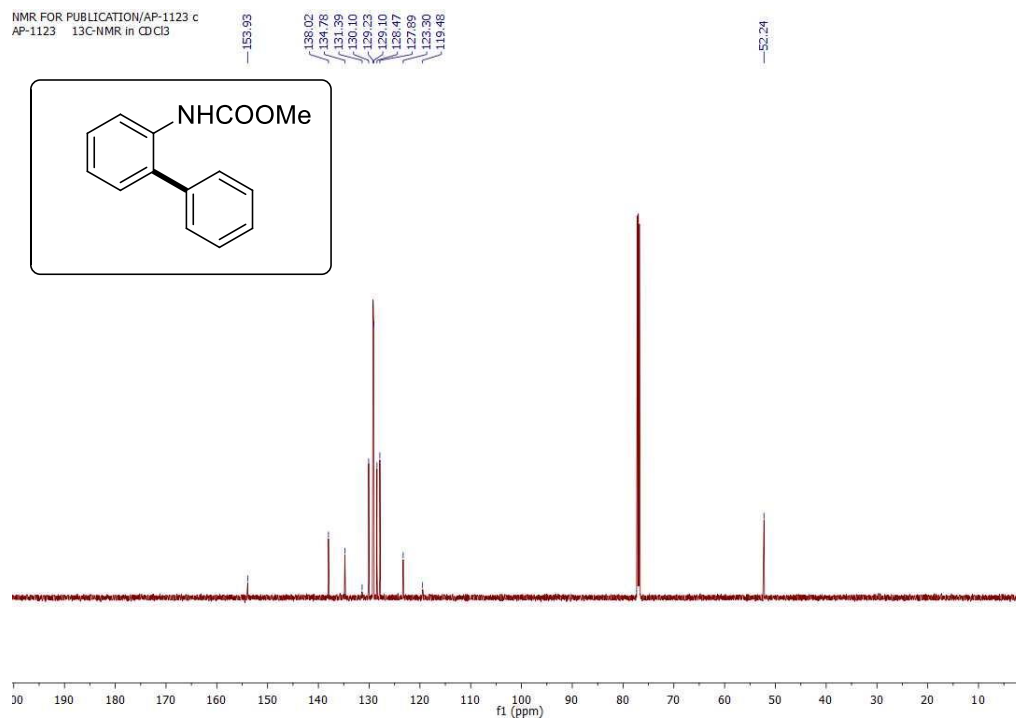

# $^1\text{H}$ NMR and $^{13}\text{C}$ NMR Spectra of compound 3b

AP-1181-1H/1 —

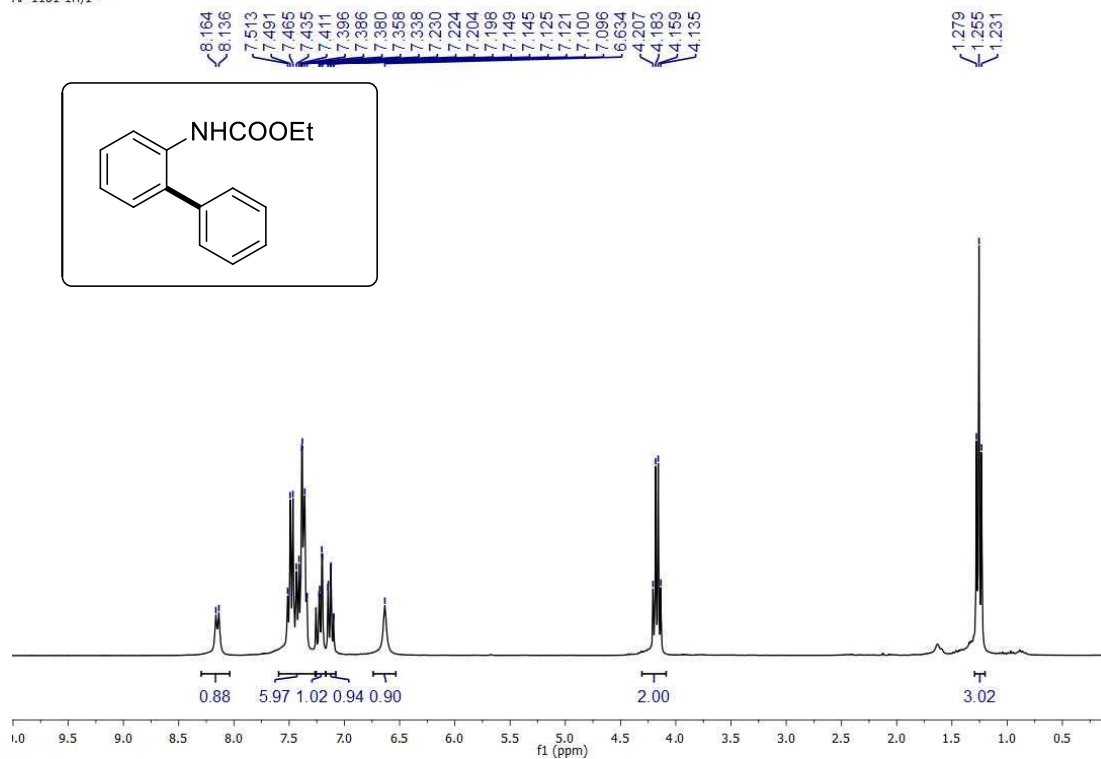

AP-1181-C/1

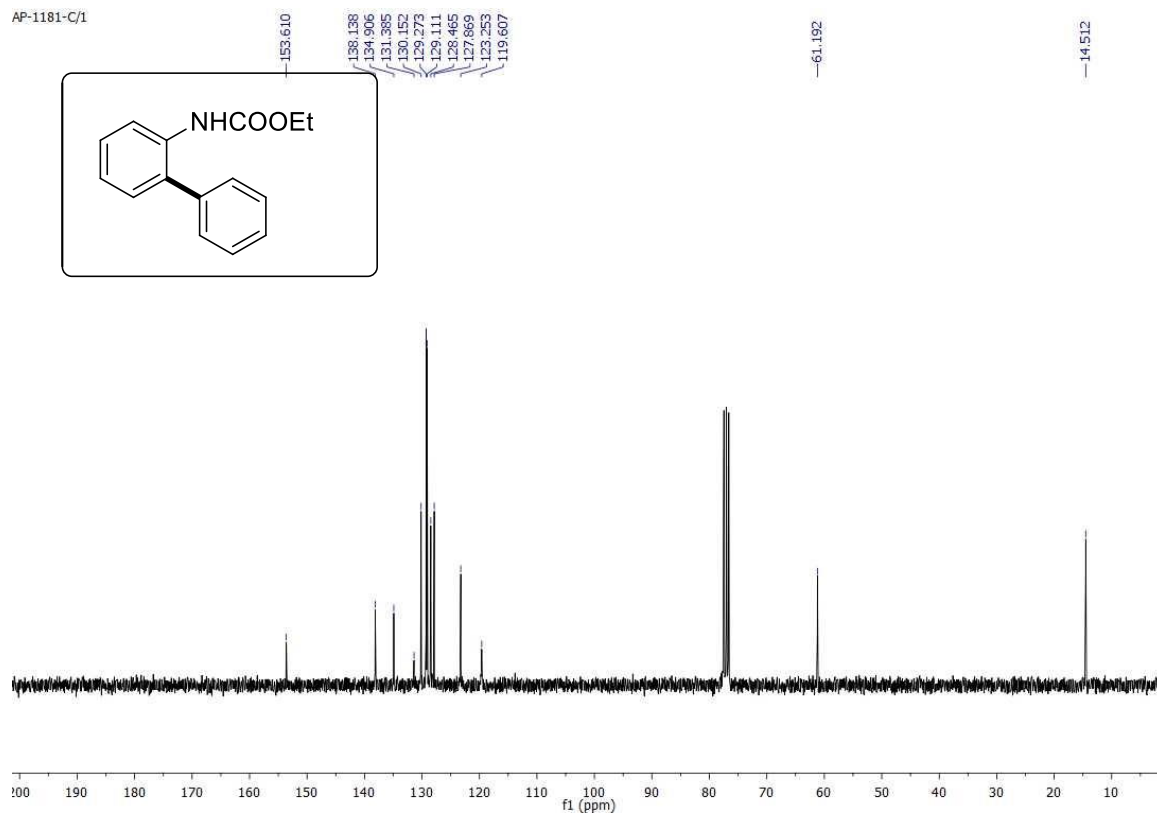

# <sup>1</sup>H NMR and <sup>13</sup>C NMR Spectra of compound 3c

AP-1147-1H/1

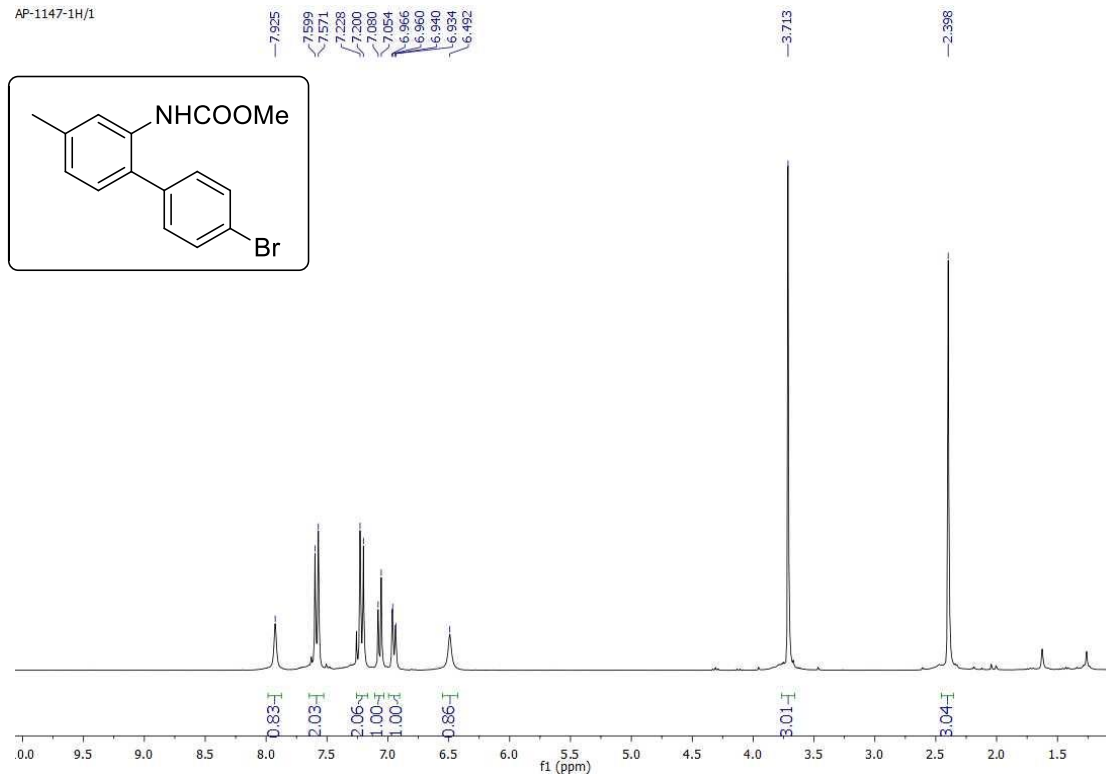

AP-1147-C.1.fid

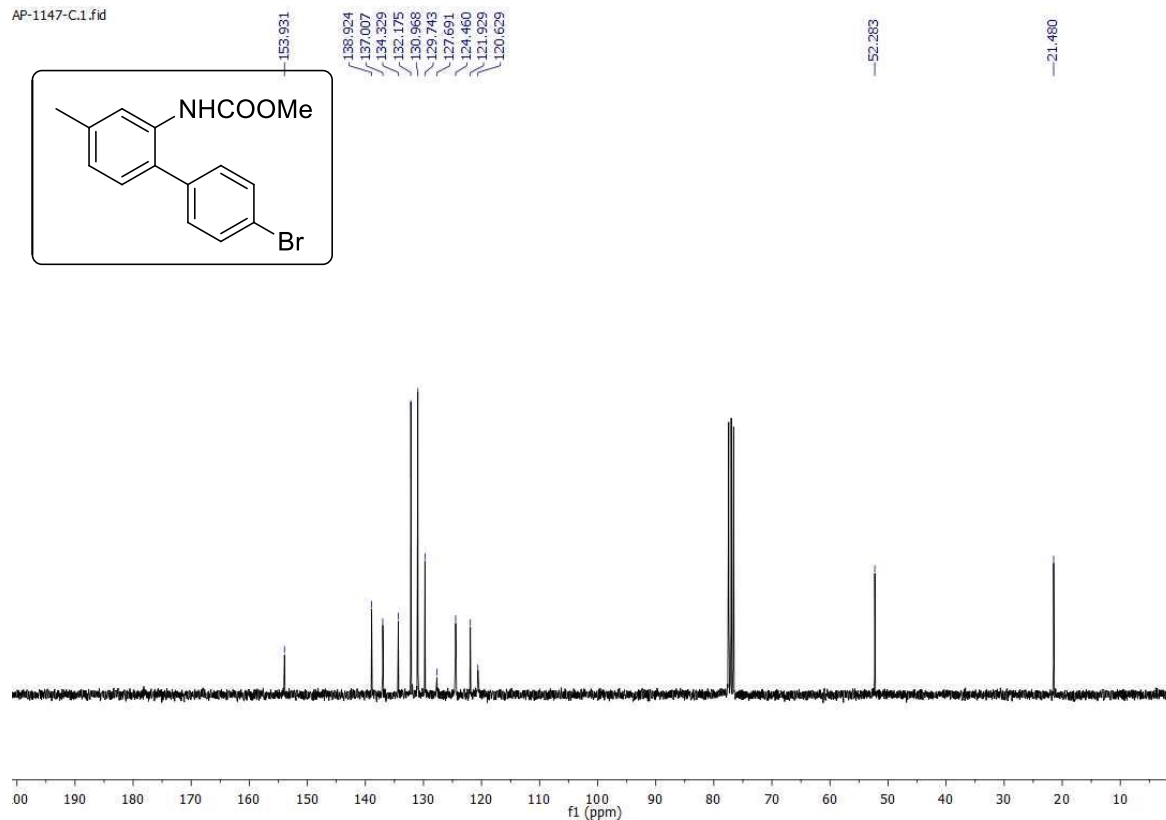

# $^1\text{H}$ NMR, $^{13}\text{C}$ NMR and $^{19}\text{F}$ NMR Spectra of compound 3d

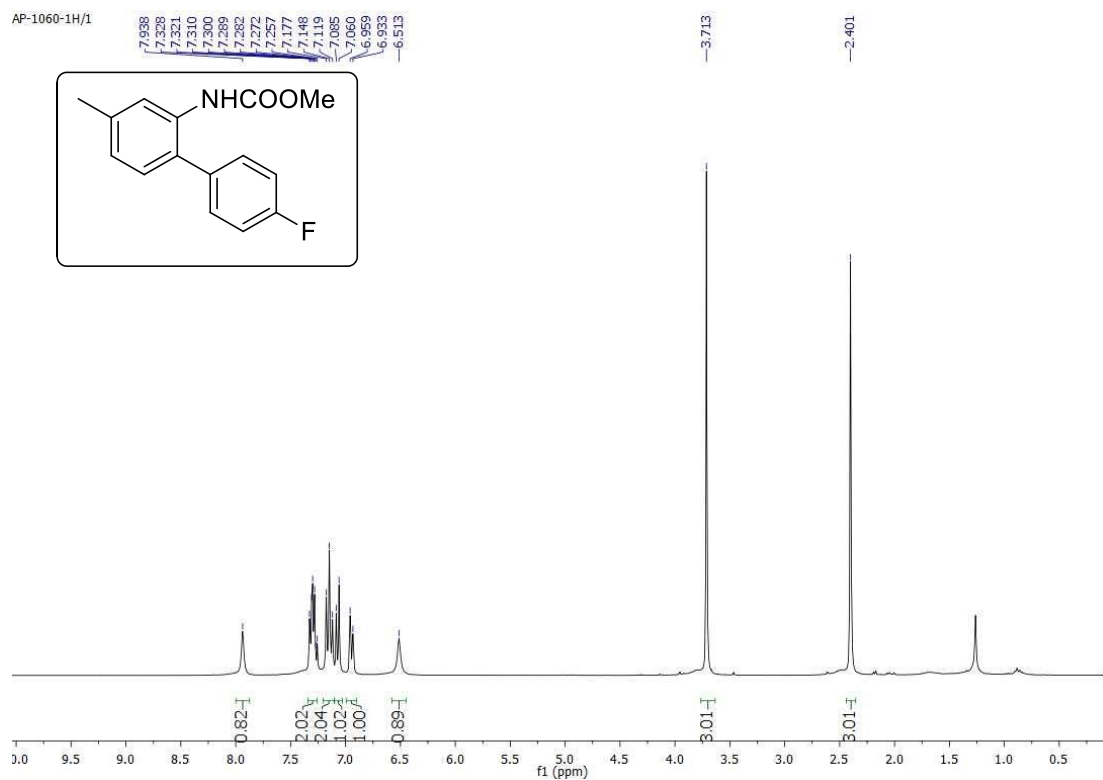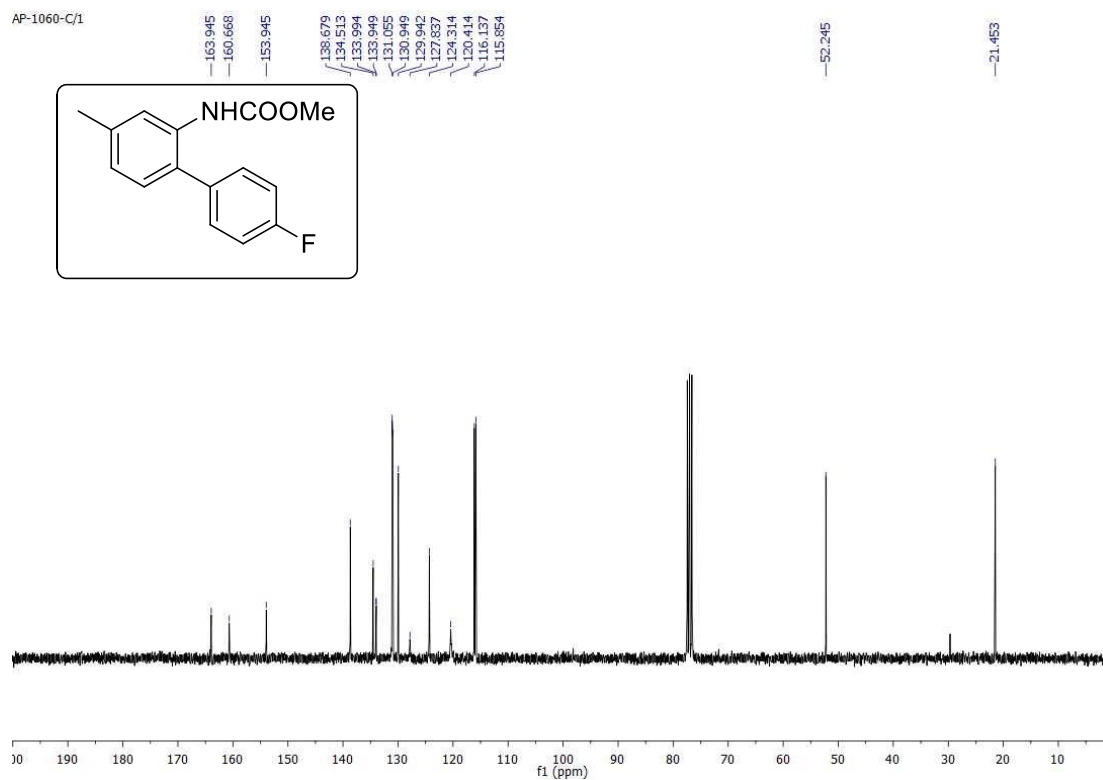

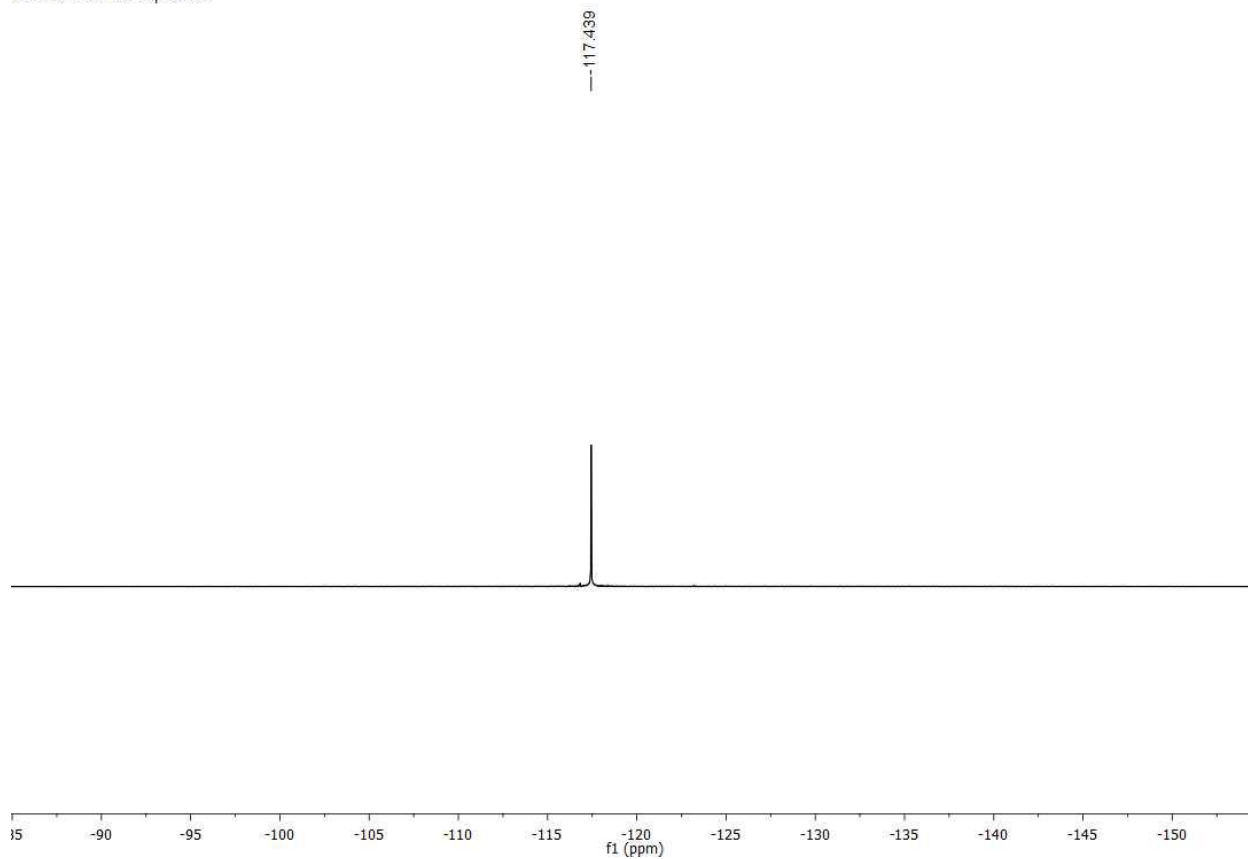



# $^1\text{H}$ NMR, $^{13}\text{C}$ NMR and $^{19}\text{F}$ NMR Spectra of compound 3e

AP-1149-1H/1

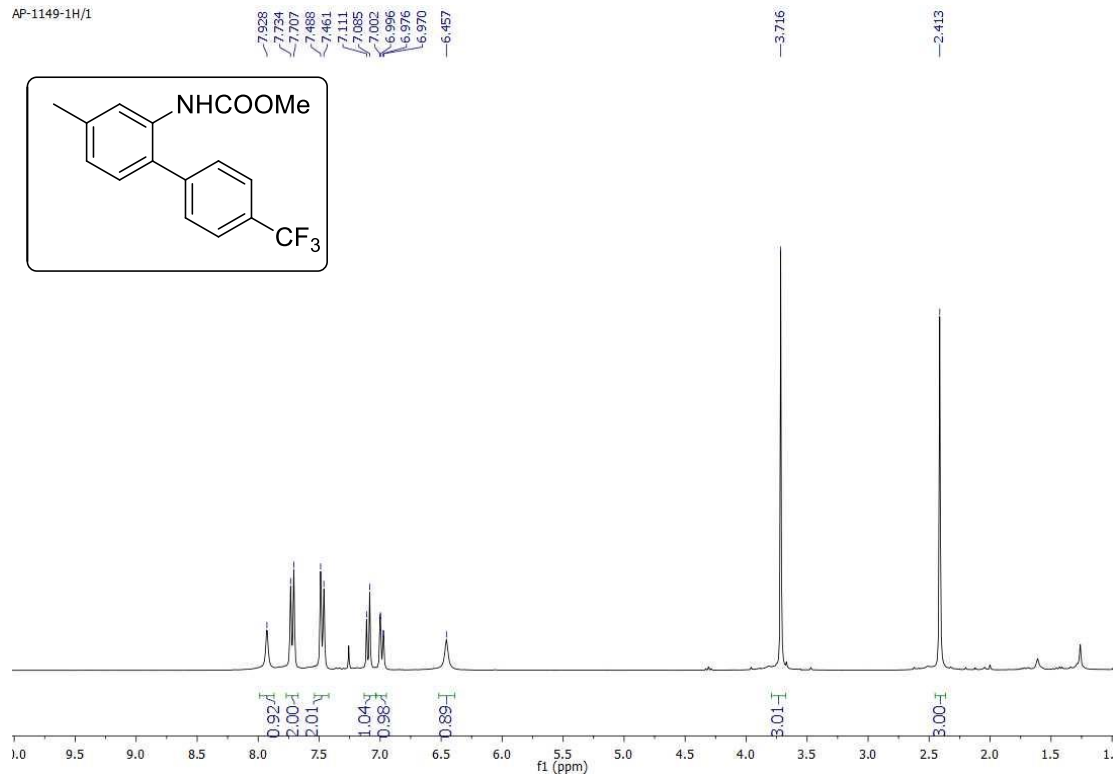

RJ-1016/4 - AP-1149  $^{13}\text{C}$ -NMR in  $\text{CDCl}_3$

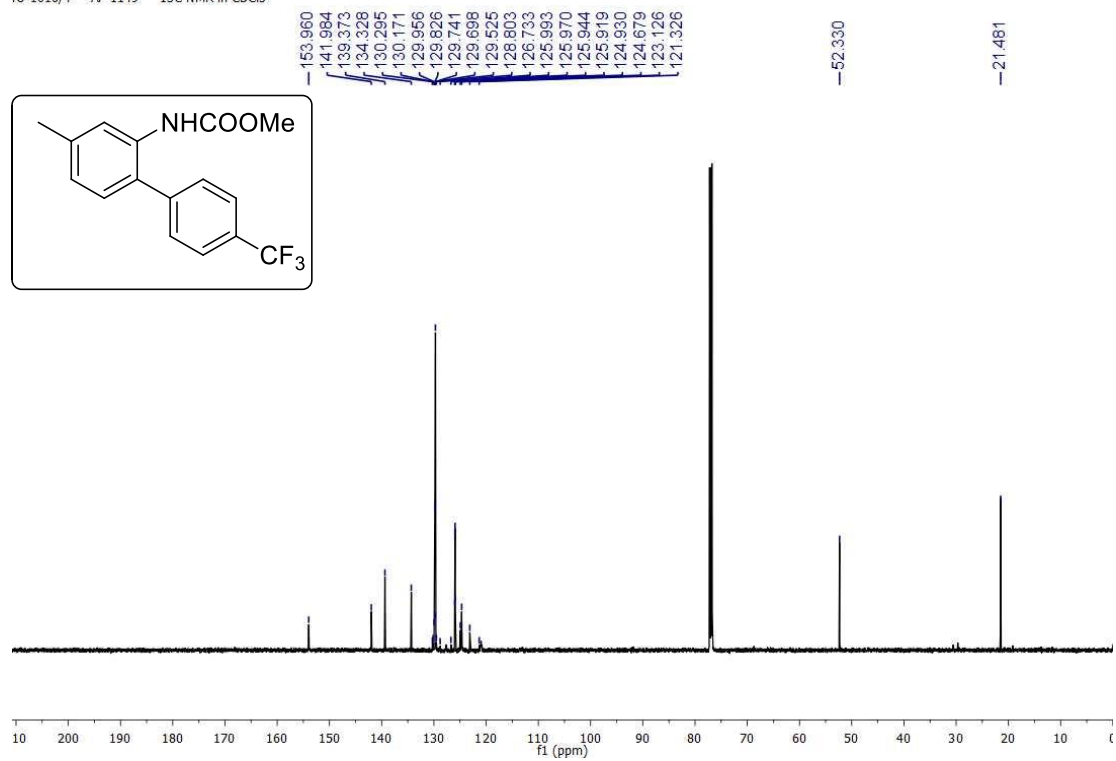

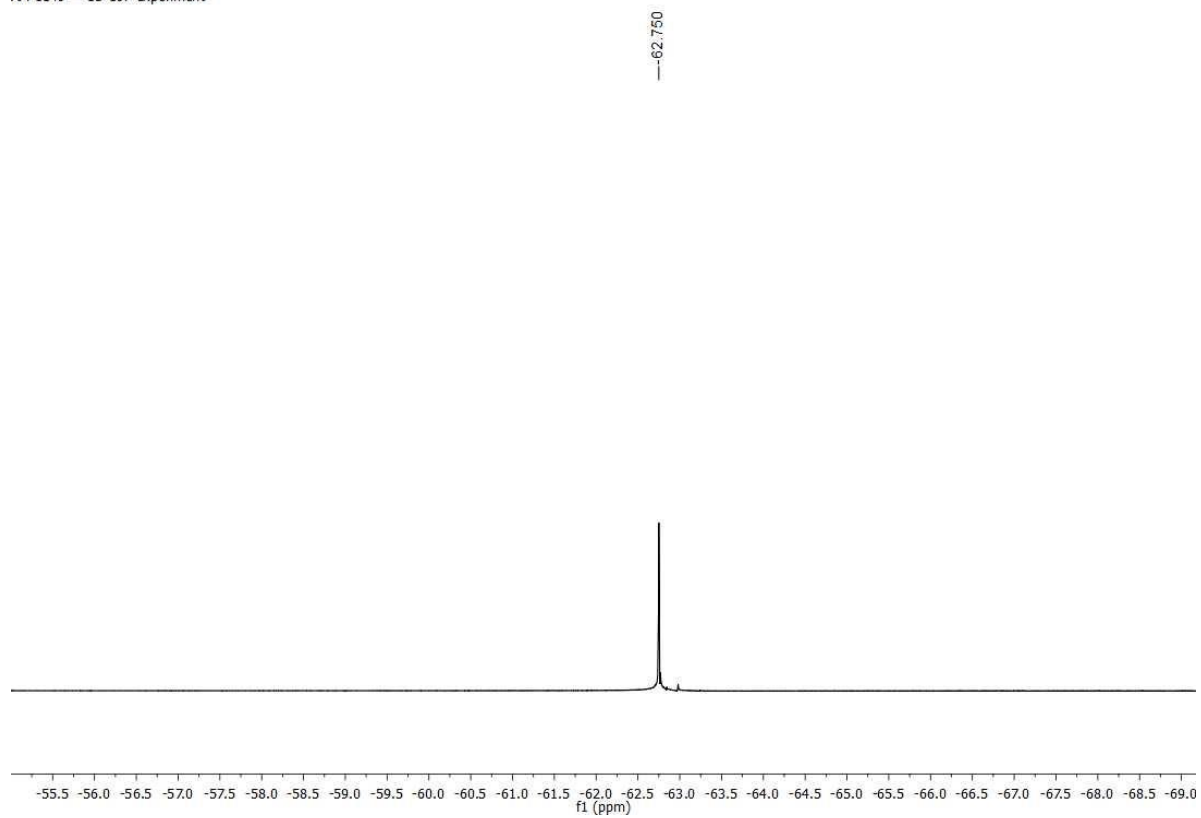

# $^1\text{H}$ NMR and $^{13}\text{C}$ NMR Spectra of compound 3f

AP-1016-1H/2 -

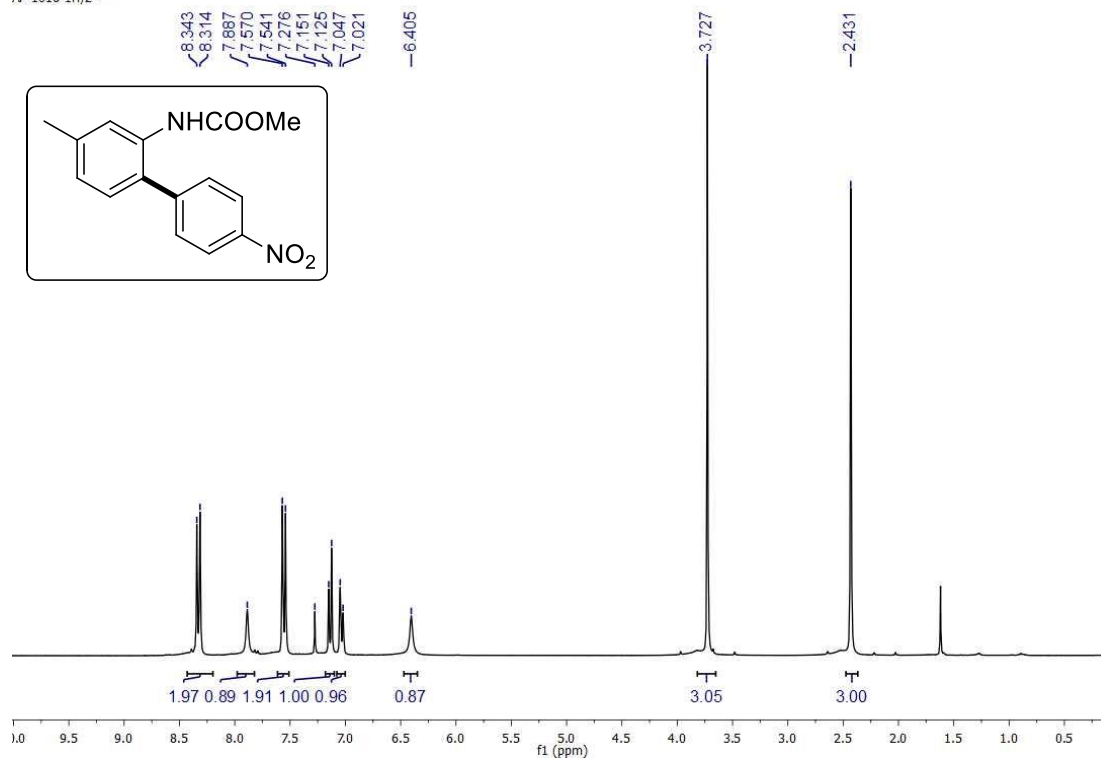

AP-1016-C.1.fid -

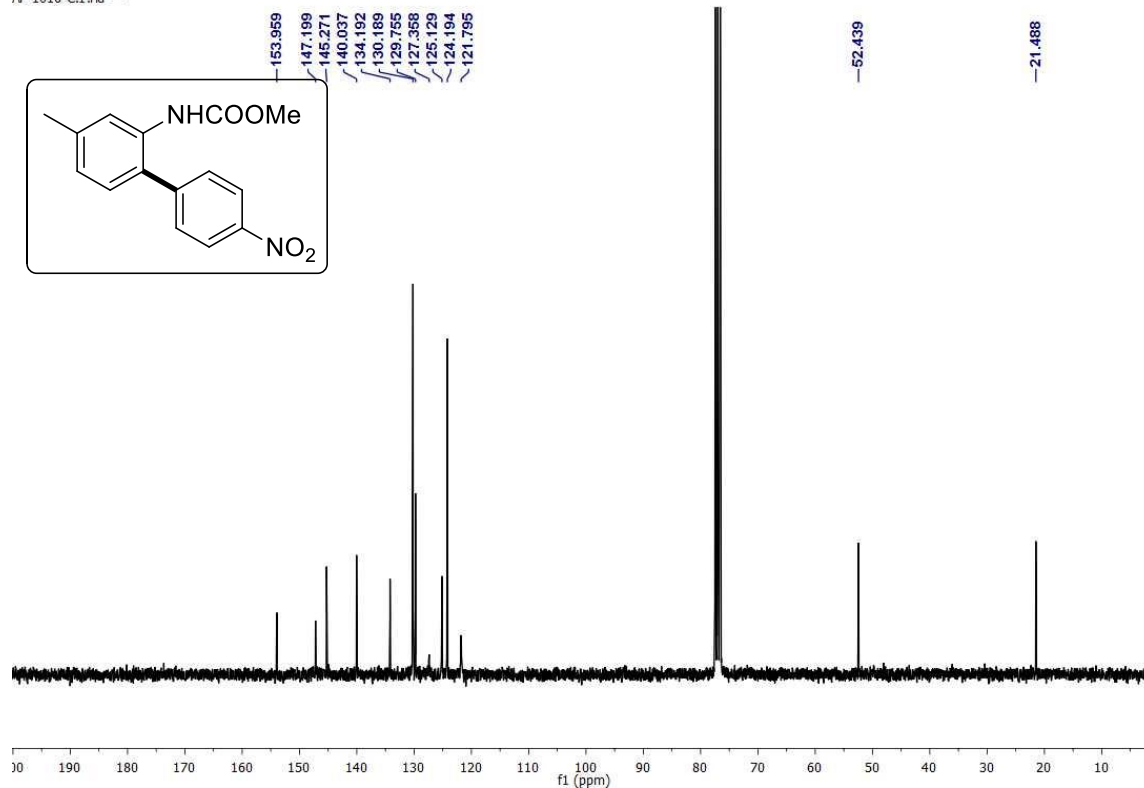

# $^1\text{H}$ NMR and $^{13}\text{C}$ NMR Spectra of compound 3g

AP-1239-1H/1

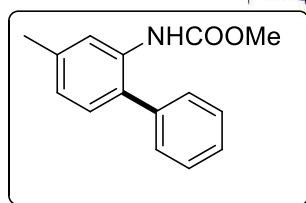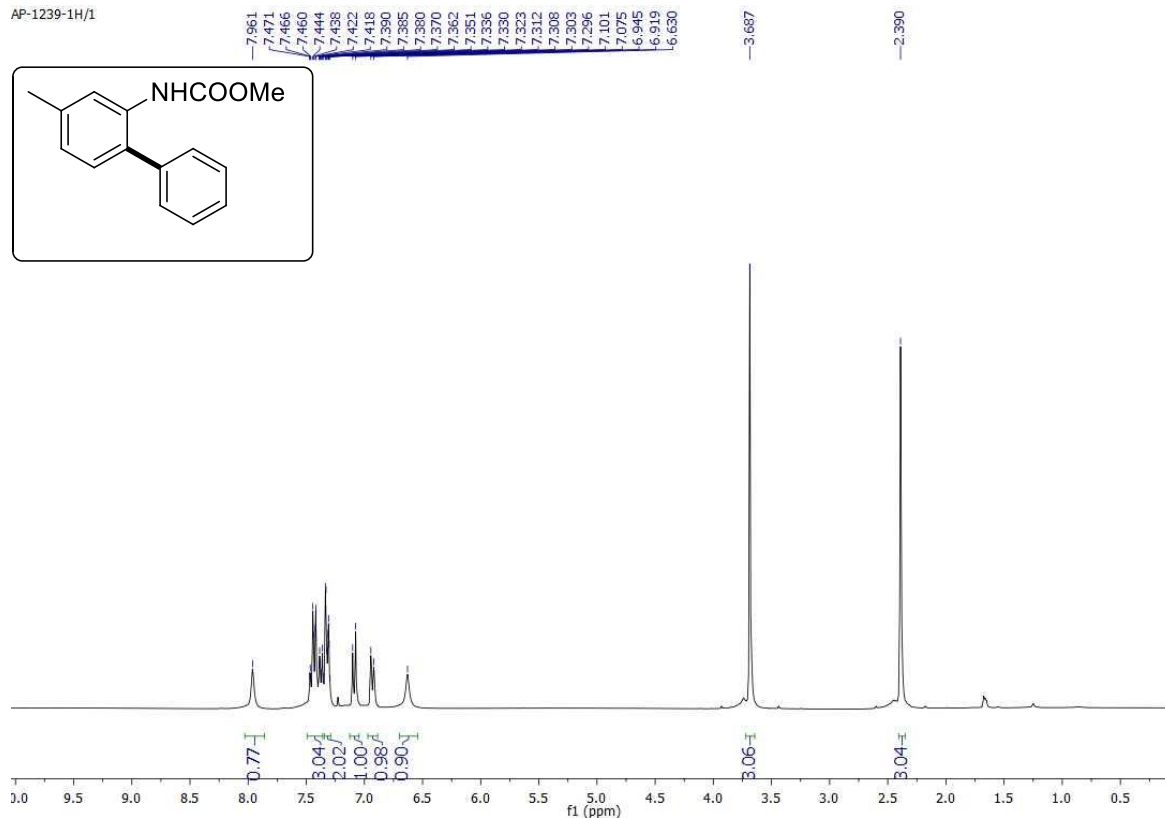

AP-1239-C/1

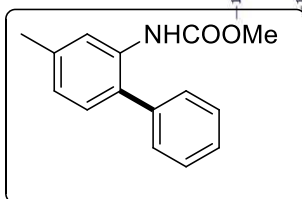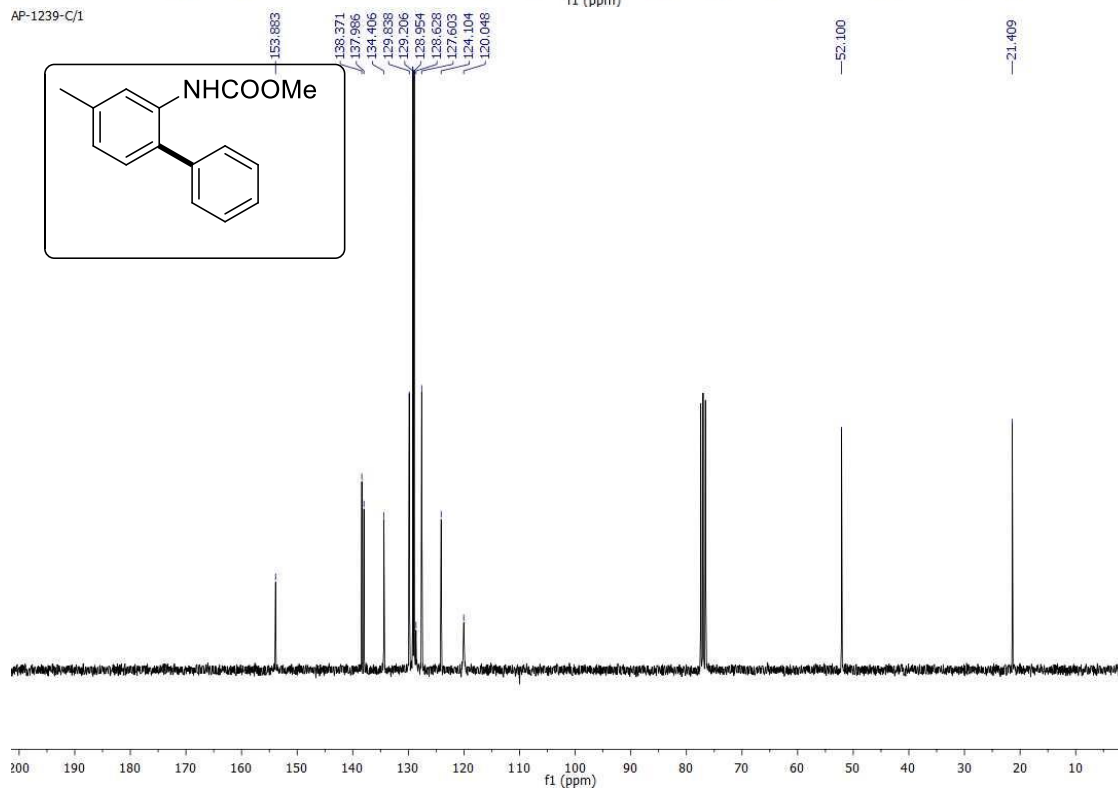

# <sup>1</sup>H NMR and <sup>13</sup>C NMR Spectra of compound 3h

AP-1232-1H/1

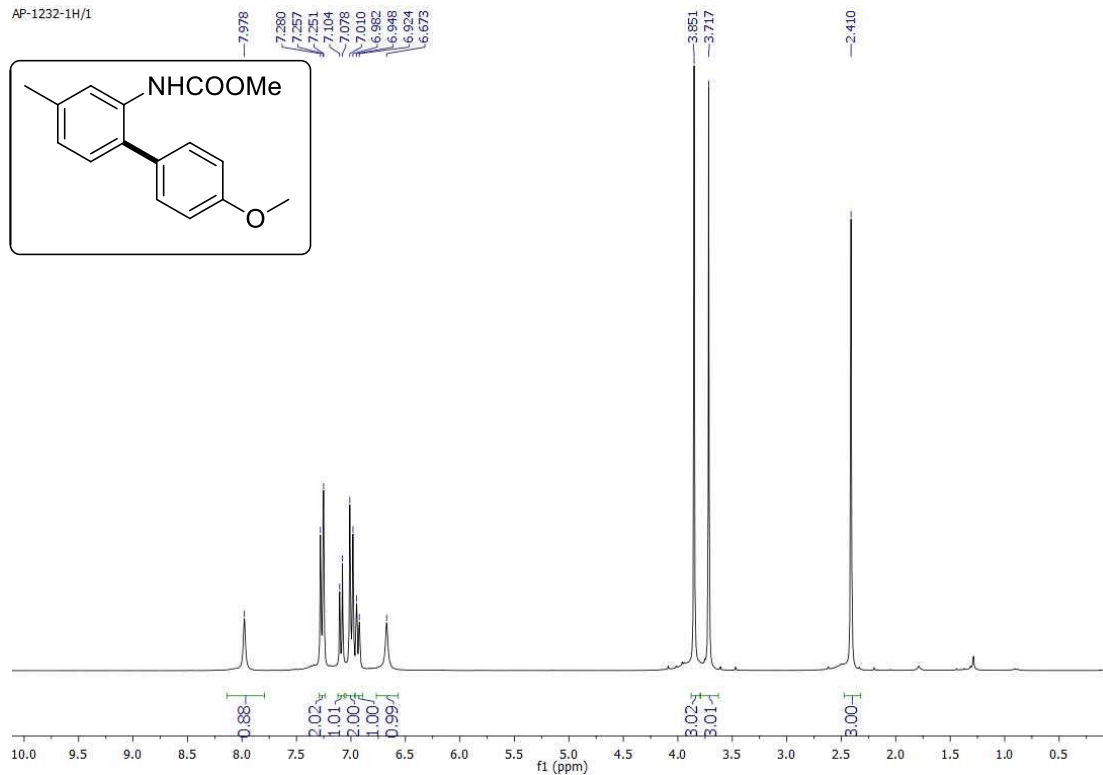

AP-1232-C/1

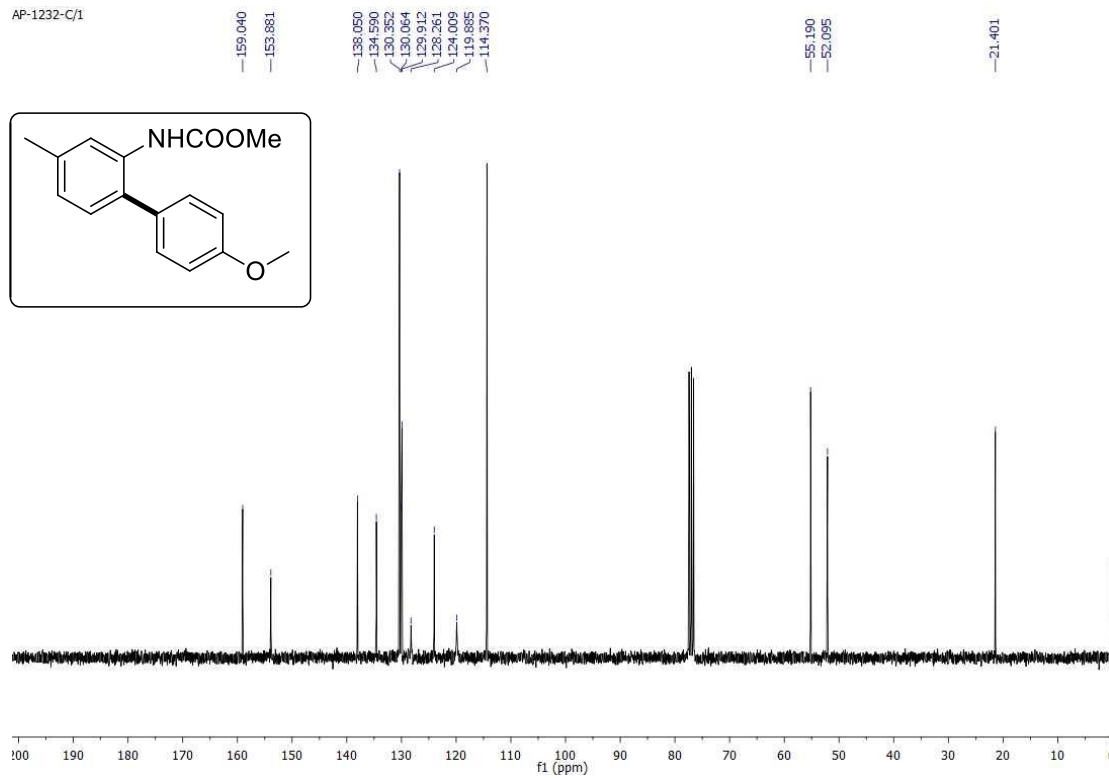

# $^1\text{H}$ NMR and $^{13}\text{C}$ NMR Spectra of compound 3i

AP-999-1H/1

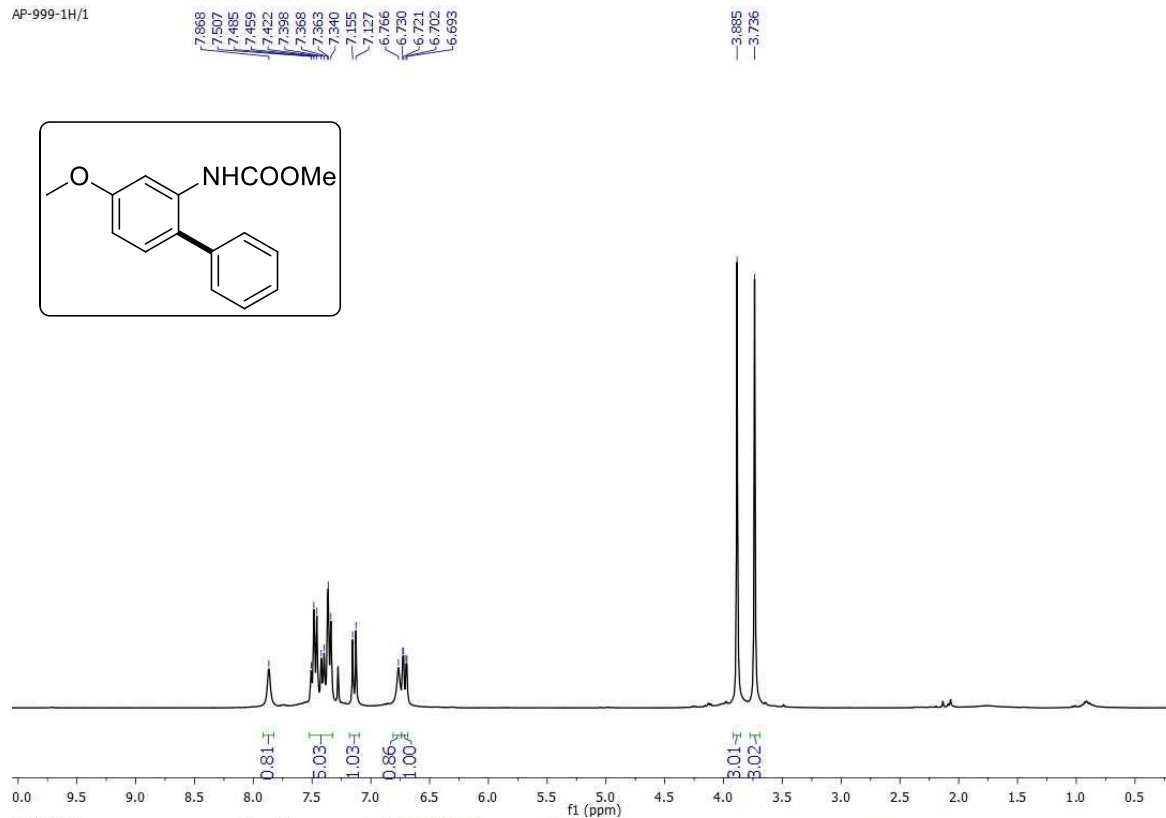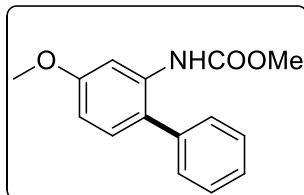

AP-999-C/1

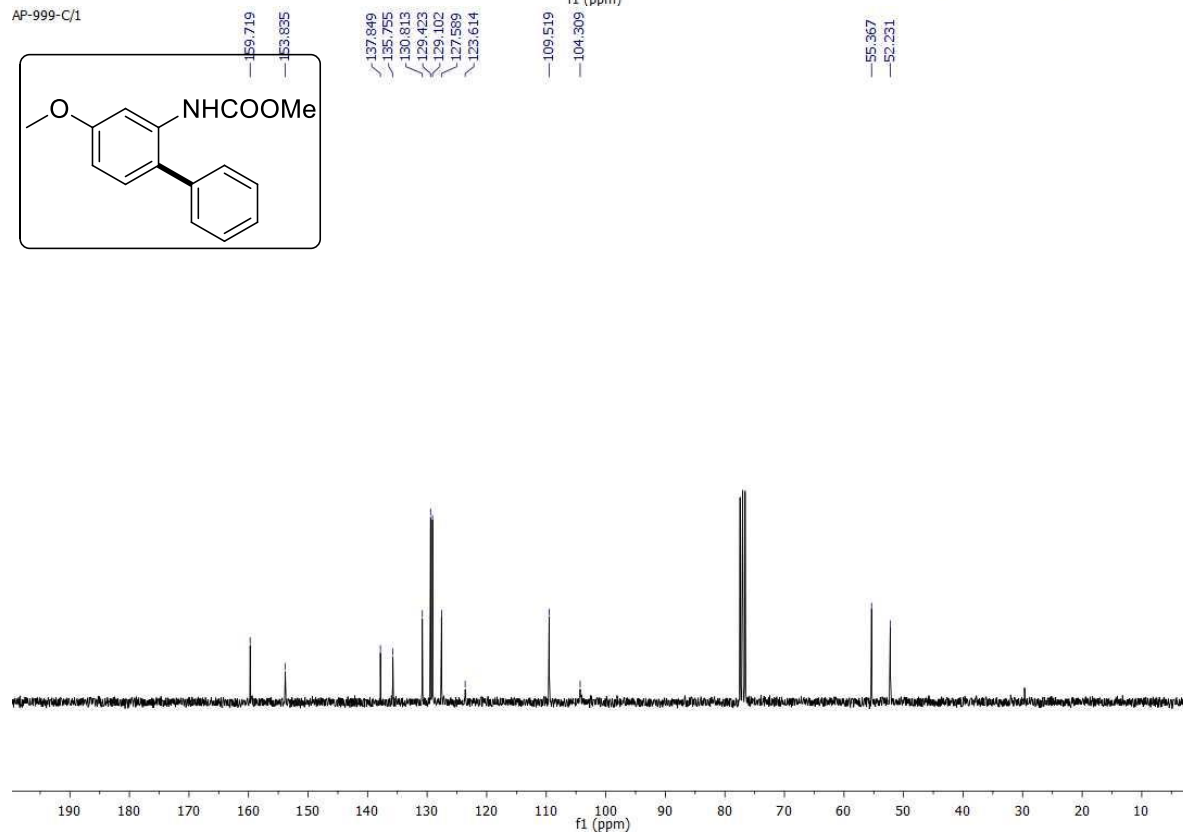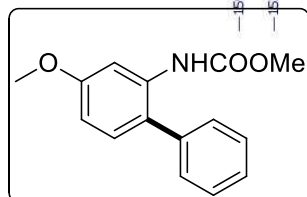

# <sup>1</sup>H NMR and <sup>13</sup>C NMR Spectra of compound 3j

AP-1107-1H/1 —

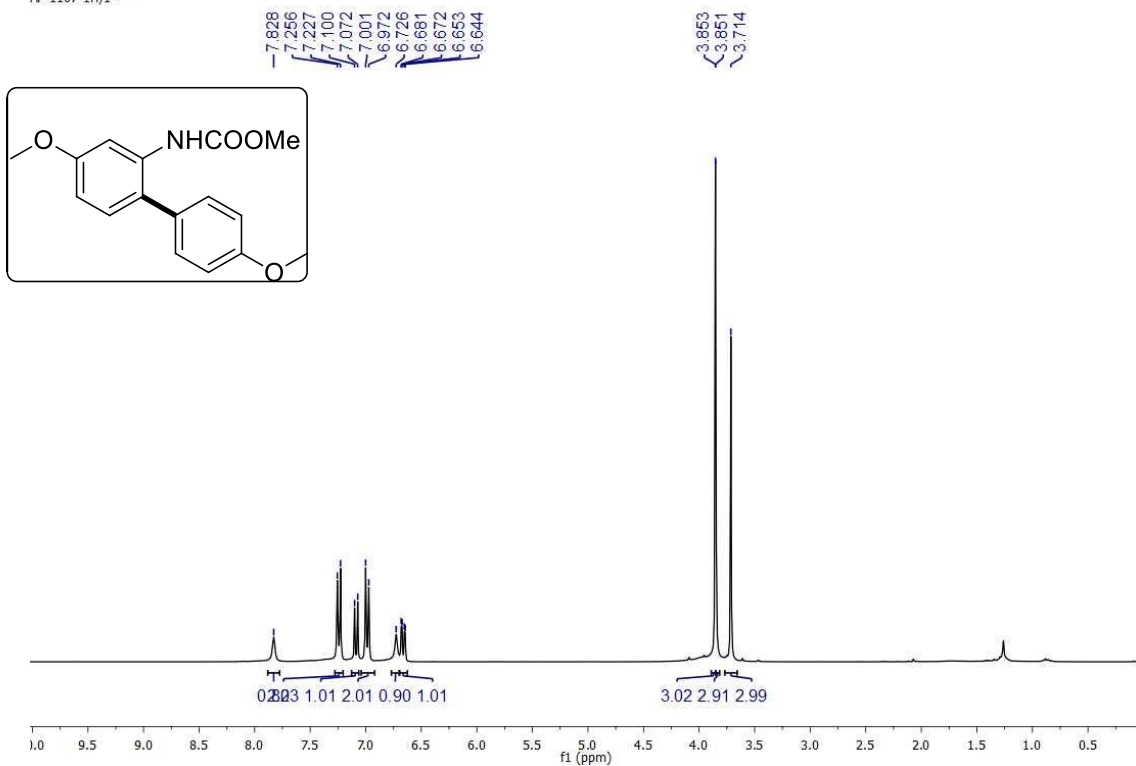

AP-1107-C.1.fid

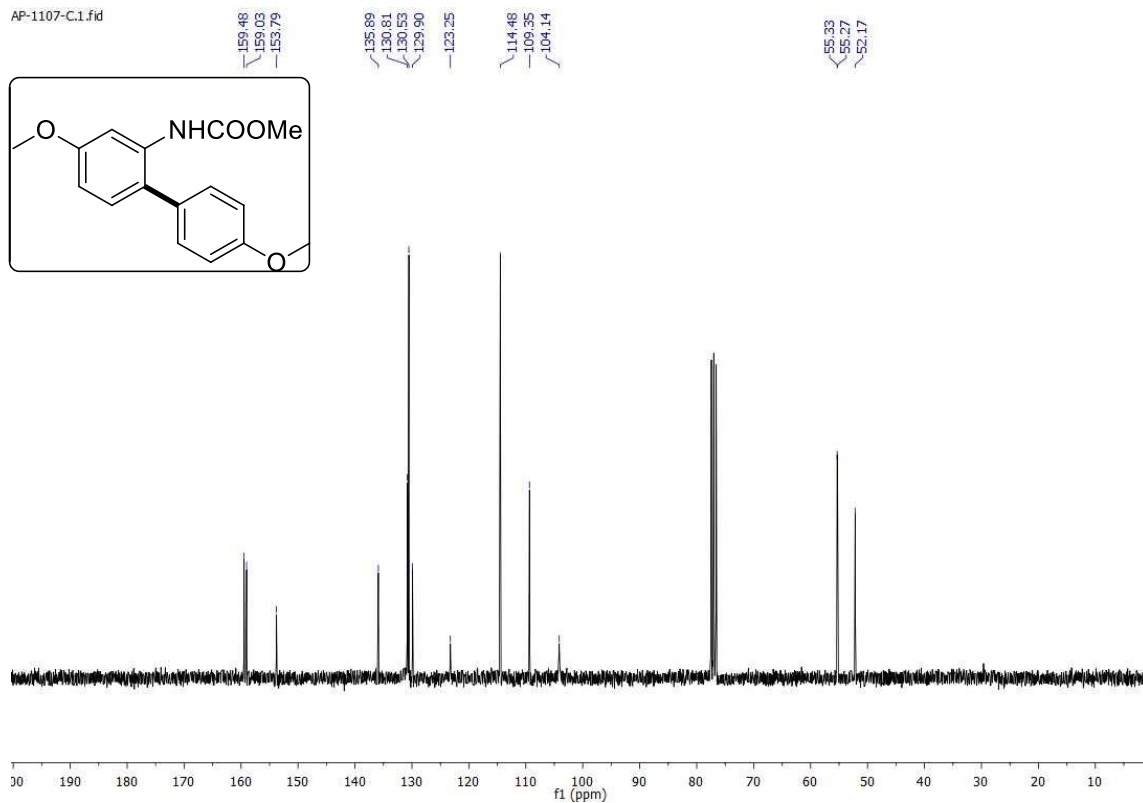

# $^1\text{H}$ NMR and $^{13}\text{C}$ NMR Spectra of compound 3k

AP-1070-1H/1

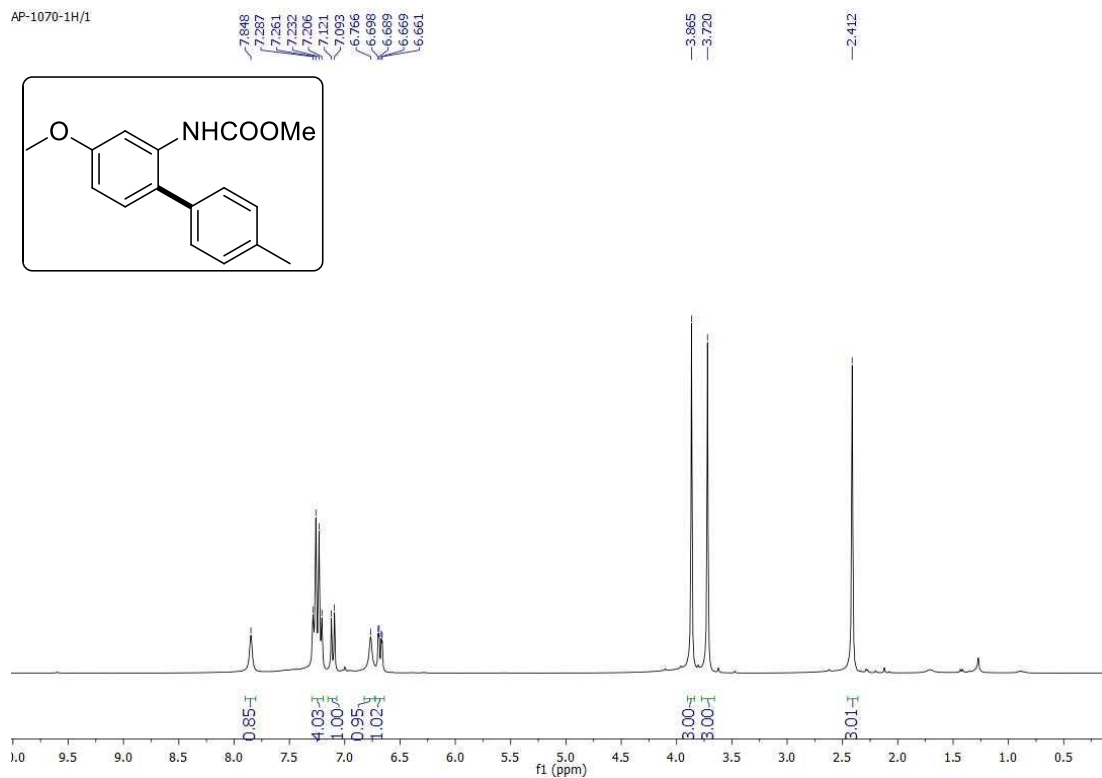

AP-1070-C/1

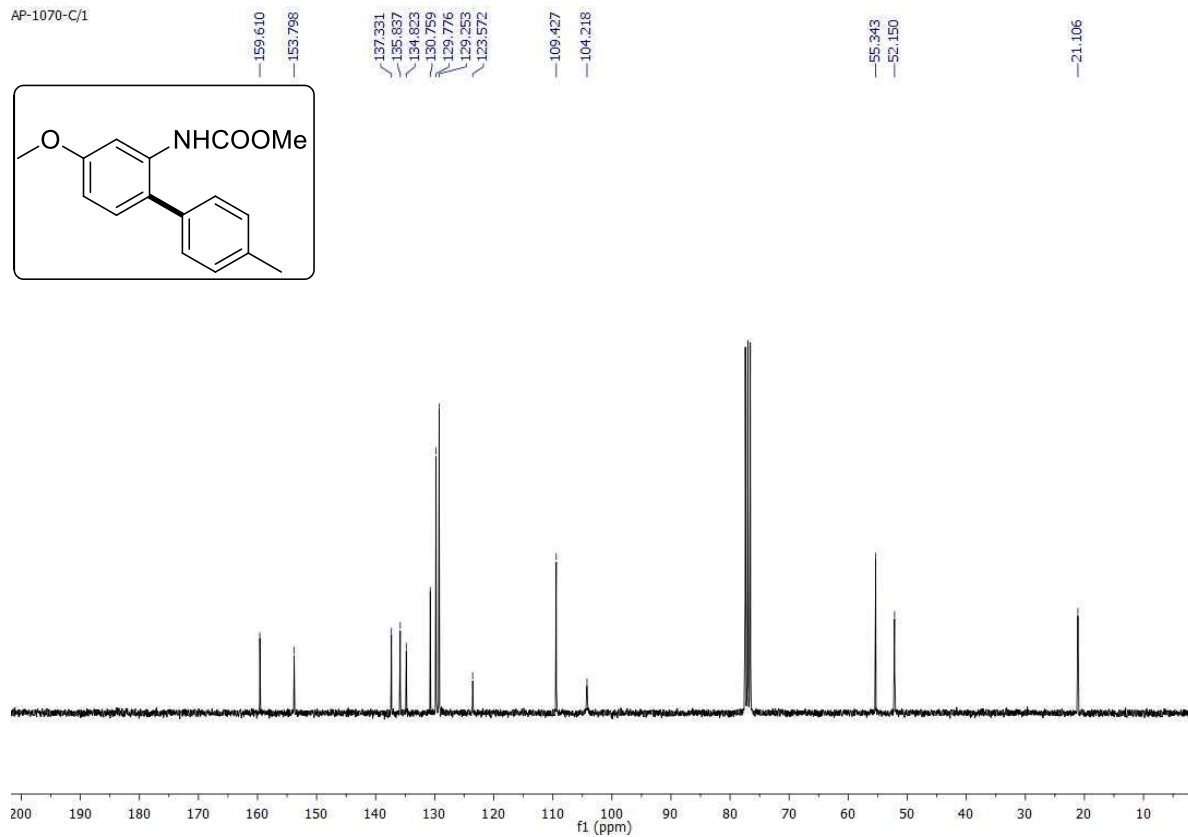



# <sup>1</sup>H NMR and <sup>13</sup>C NMR Spectra of compound 31

KVL-07 — single\_pulse

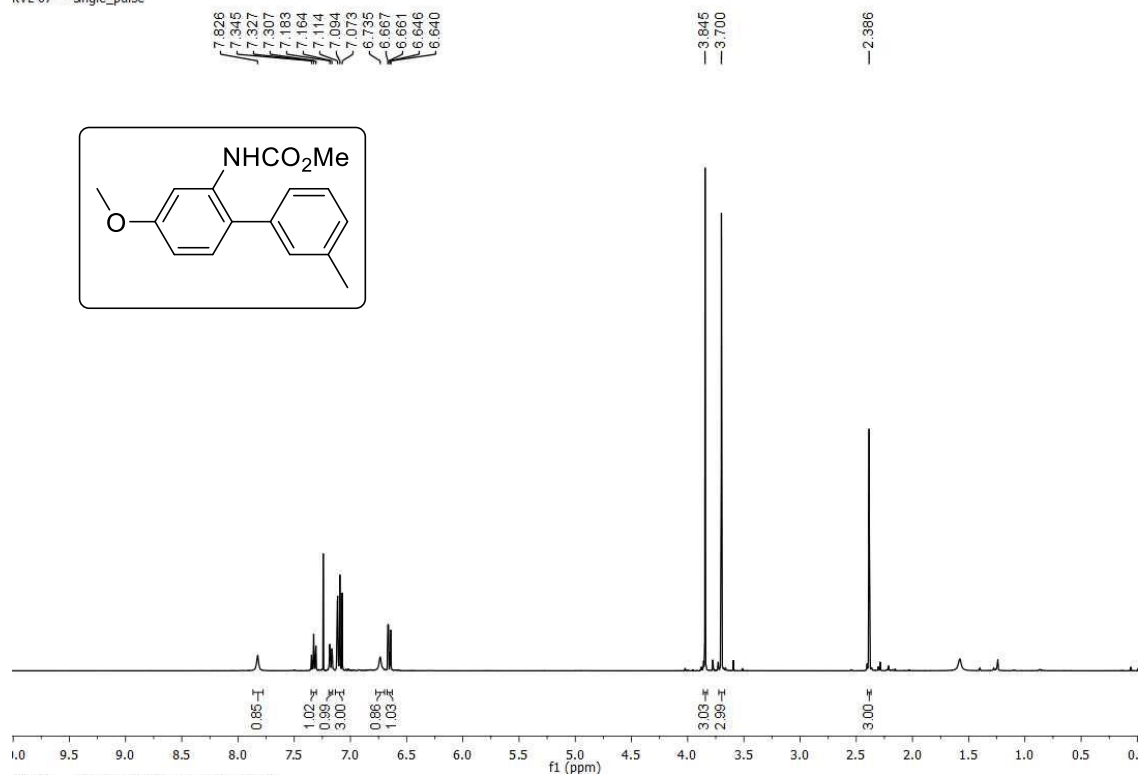

KVL-07 — single pulse decoupled gated NOE

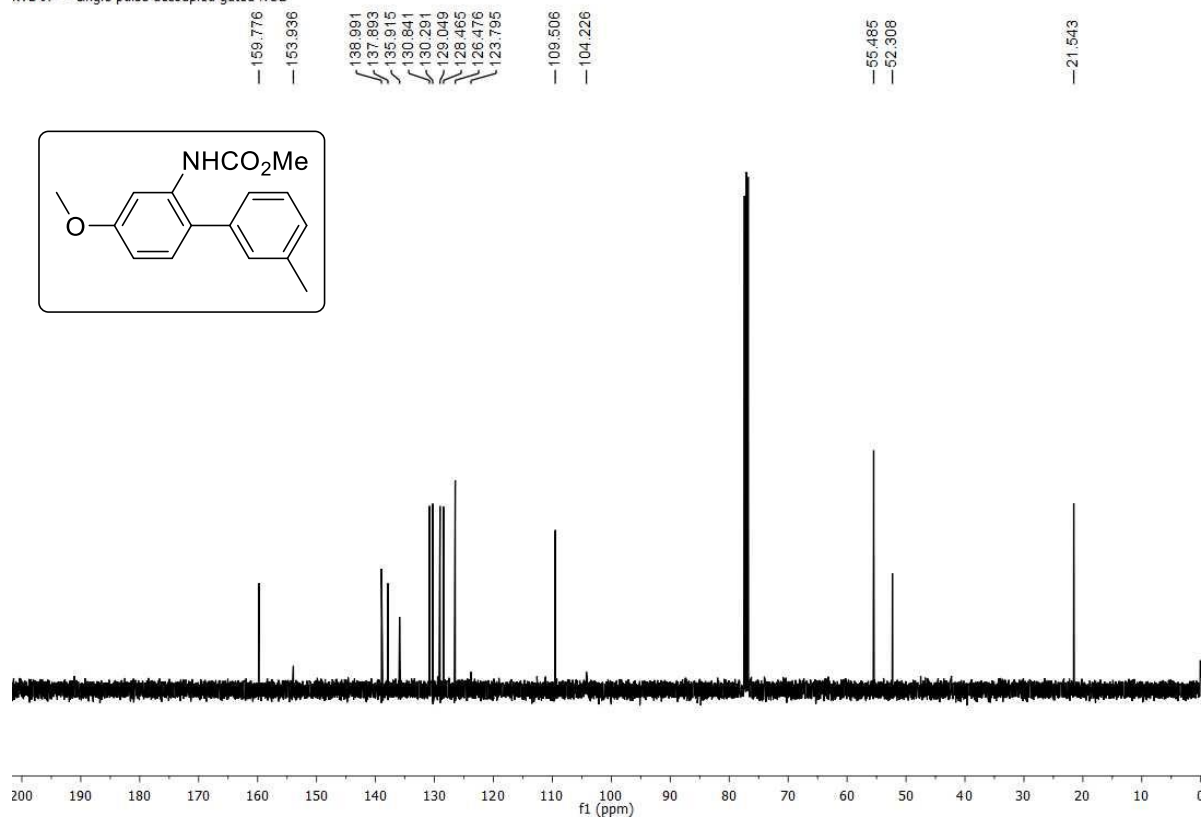

# $^1\text{H}$ NMR and $^{13}\text{C}$ NMR Spectra of compound 3m

G5/19  
AP-1071  $^1\text{H}$ -NMR in  $\text{CDCl}_3$

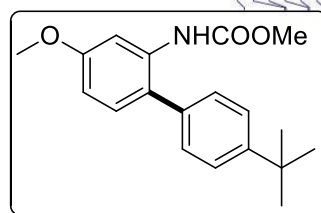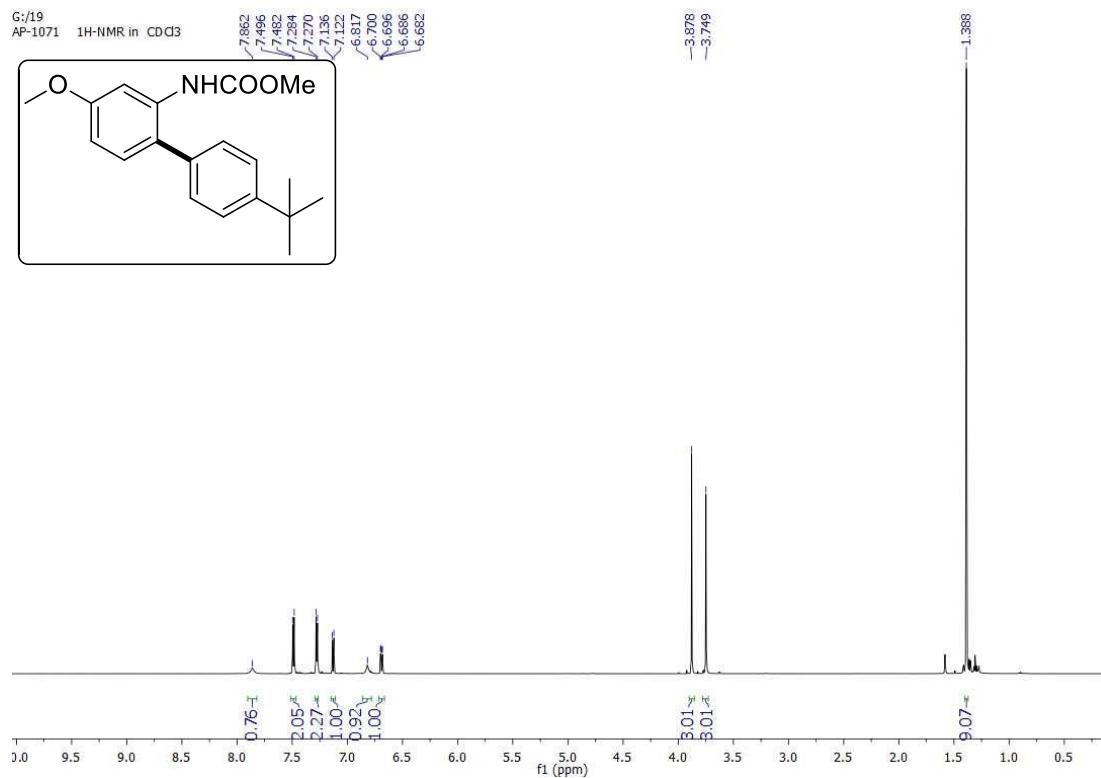

G5/20  
AP-1071  $^{13}\text{C}$ -NMR in  $\text{CDCl}_3$

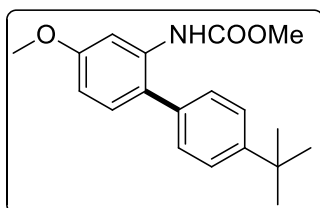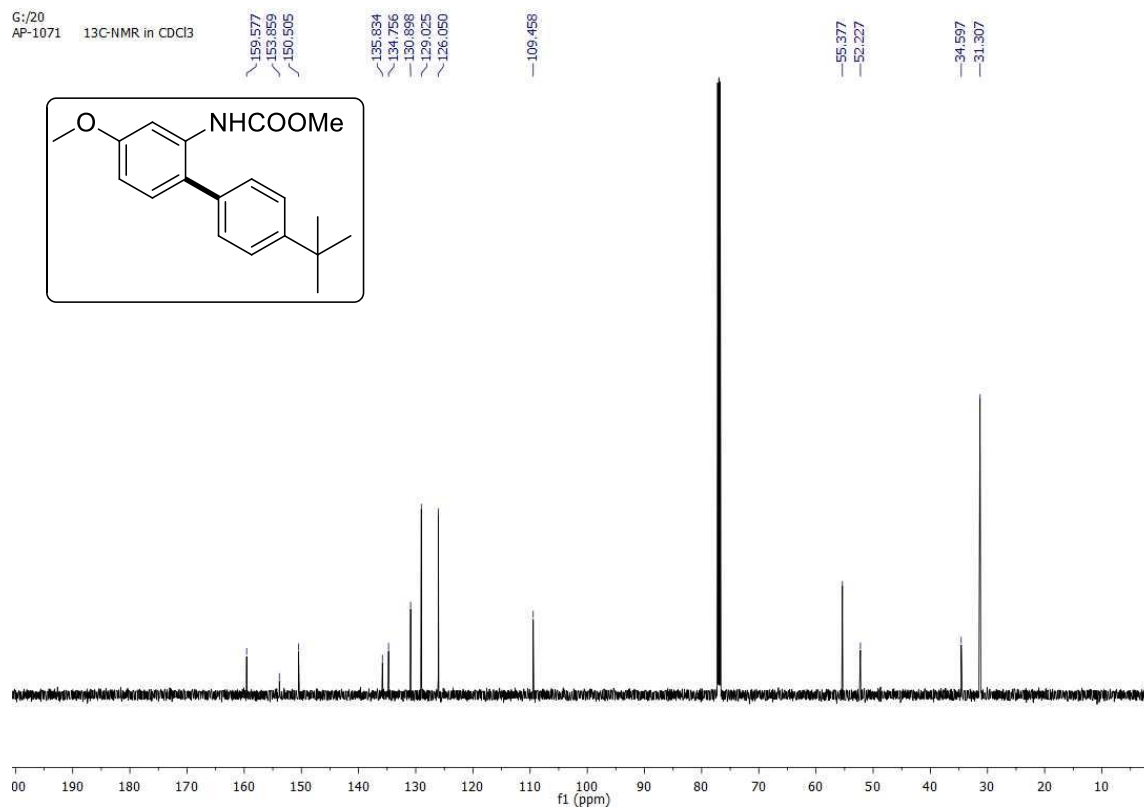

# <sup>1</sup>H NMR and <sup>13</sup>C NMR Spectra of compound 3n

AP-1057AF-1H/1

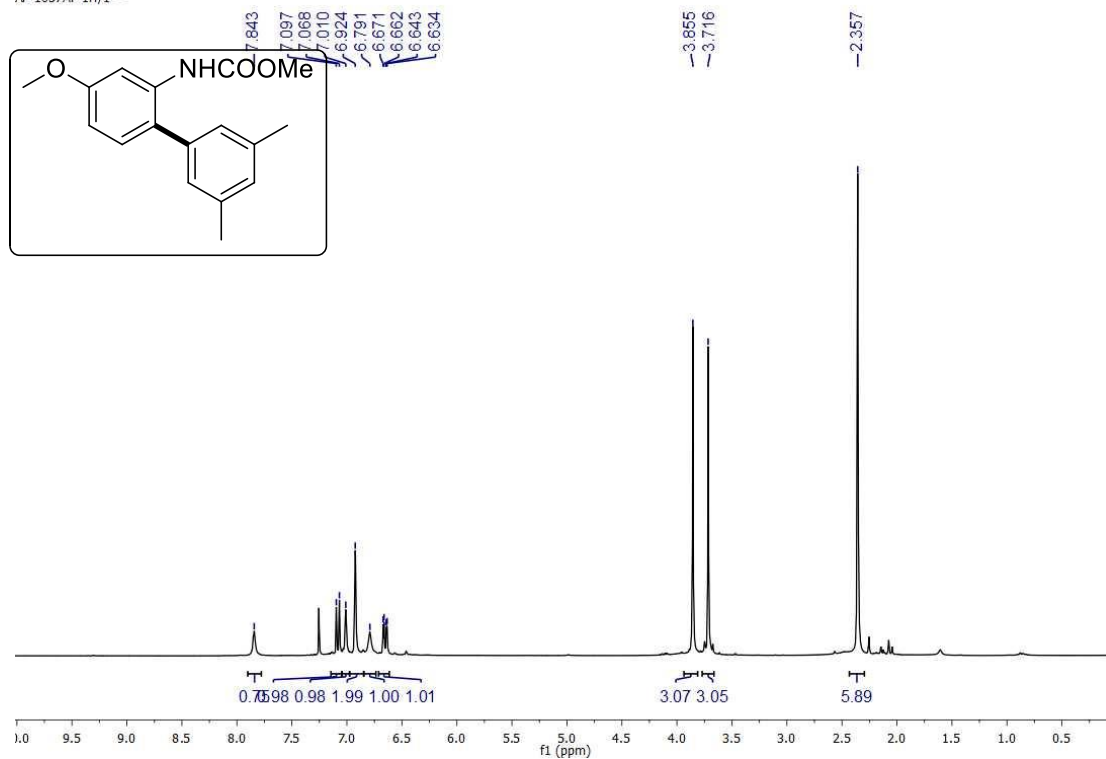

AP-1057-C/1

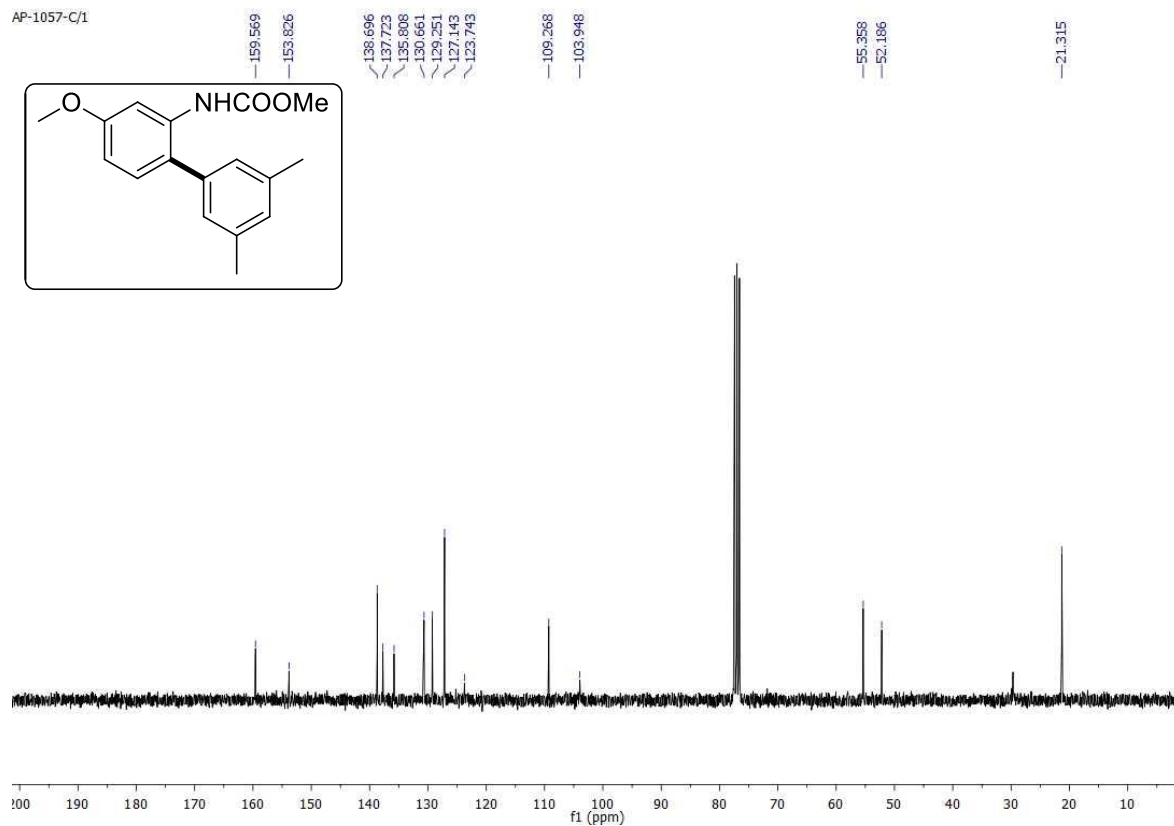

# <sup>1</sup>H NMR and <sup>13</sup>C NMR Spectra of compound 3o

AP-1116-1H/1

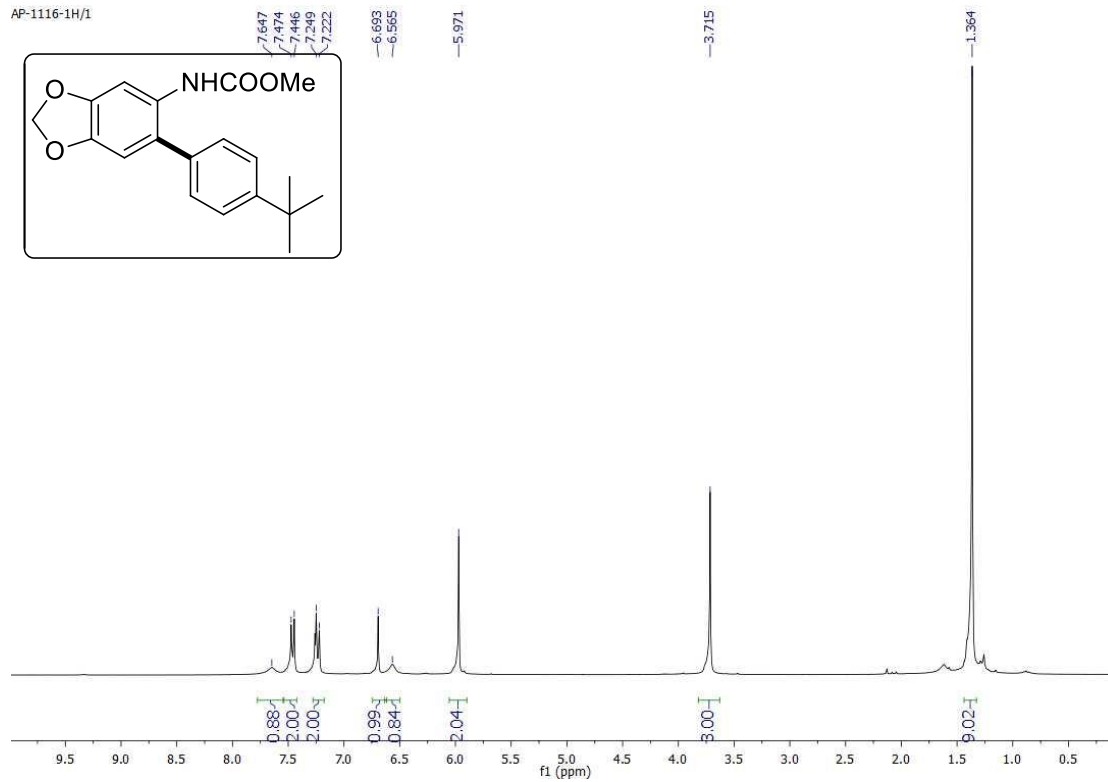

NMR FOR PUBLICATION/AP-1116 C  
AP-1116 <sup>13</sup>C-NMR in CDCl<sub>3</sub>

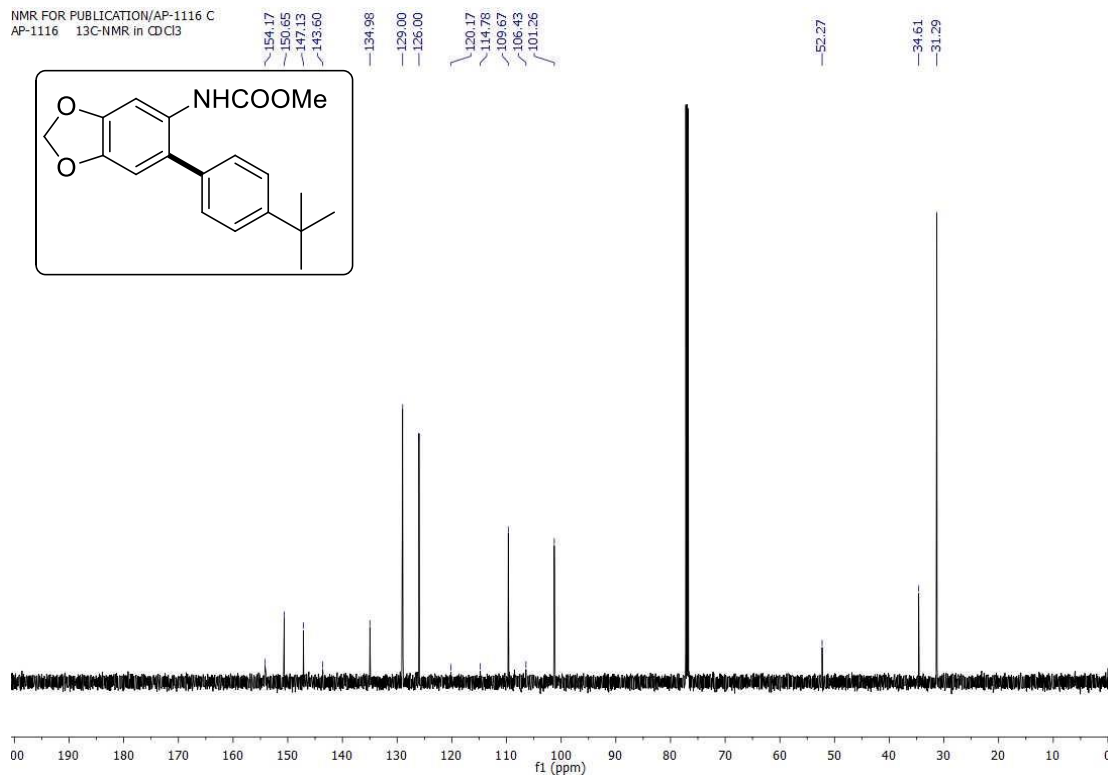

# $^1\text{H}$ NMR, $^{13}\text{C}$ NMR and $^{19}\text{F}$ NMR Spectra of compound 3p

NMR FOR PUBLICATION/AP-1118 H  
AH-118  $^1\text{H}$ -NMR in  $\text{CDCl}_3$

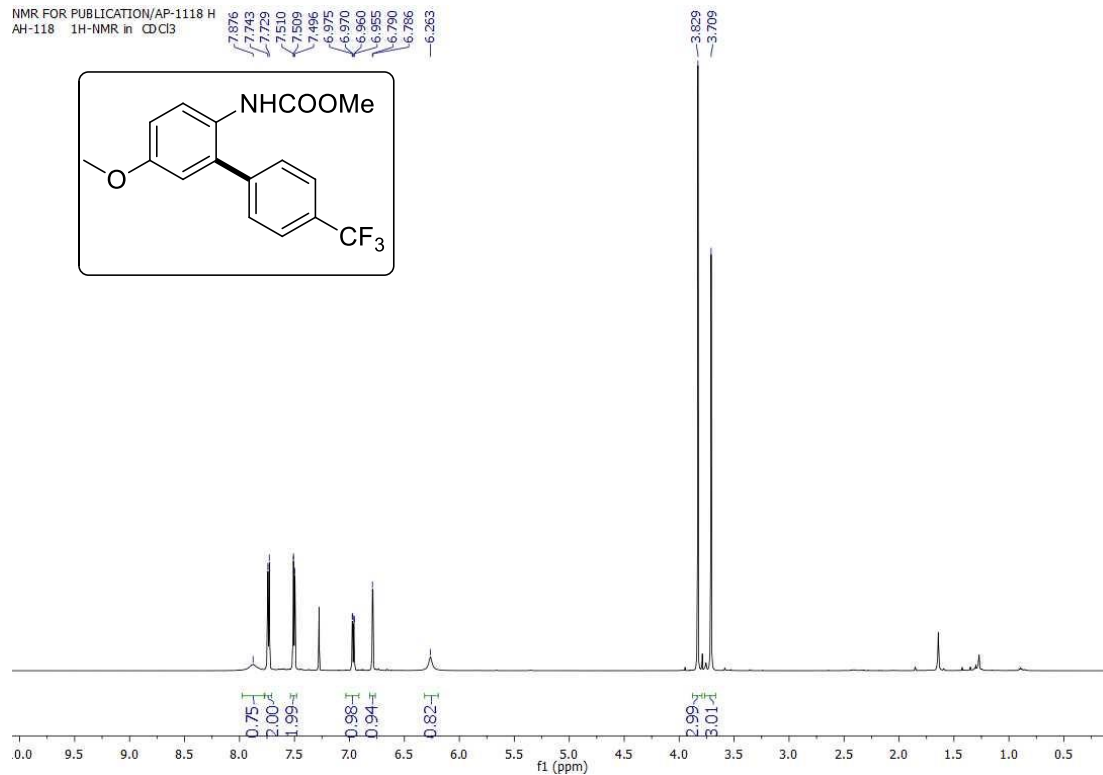

NMR FOR PUBLICATION/AP-1118  
AH-118  $^{13}\text{C}$ -NMR in  $\text{CDCl}_3$

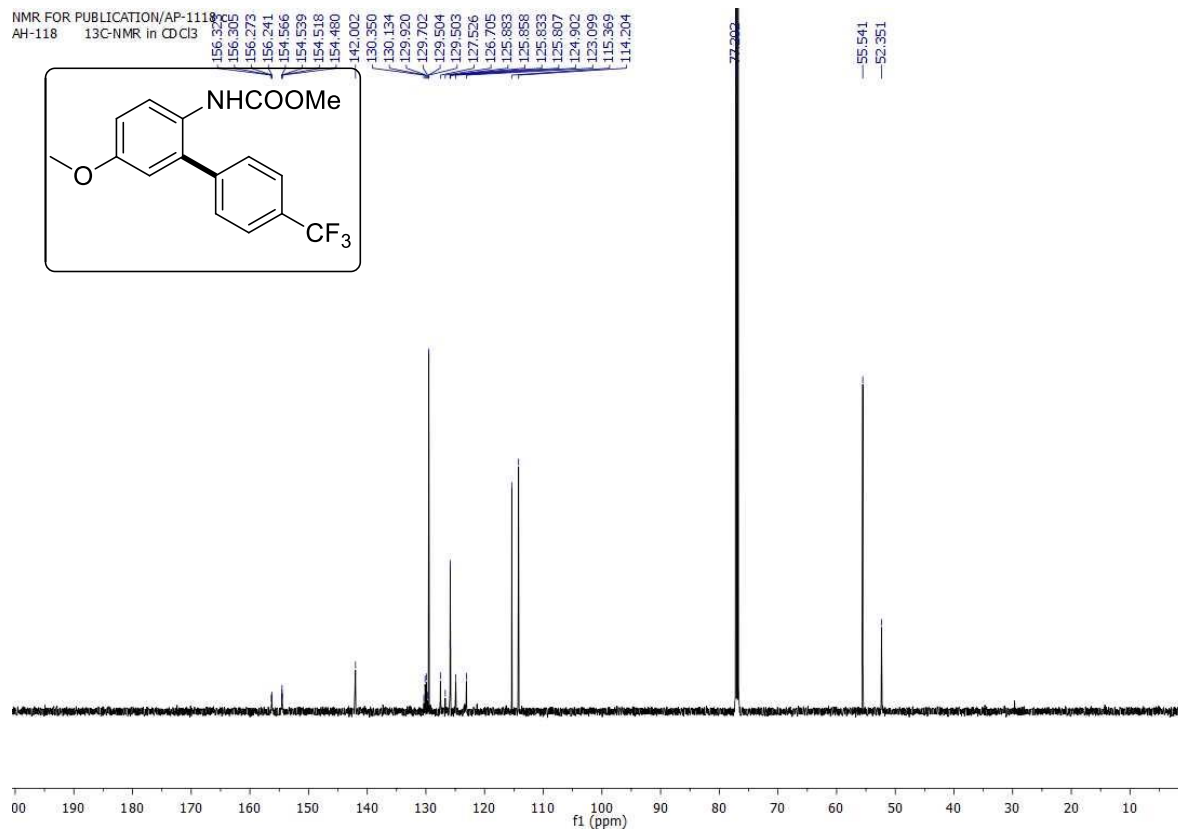

AP-1118 — 1D 19F experiment

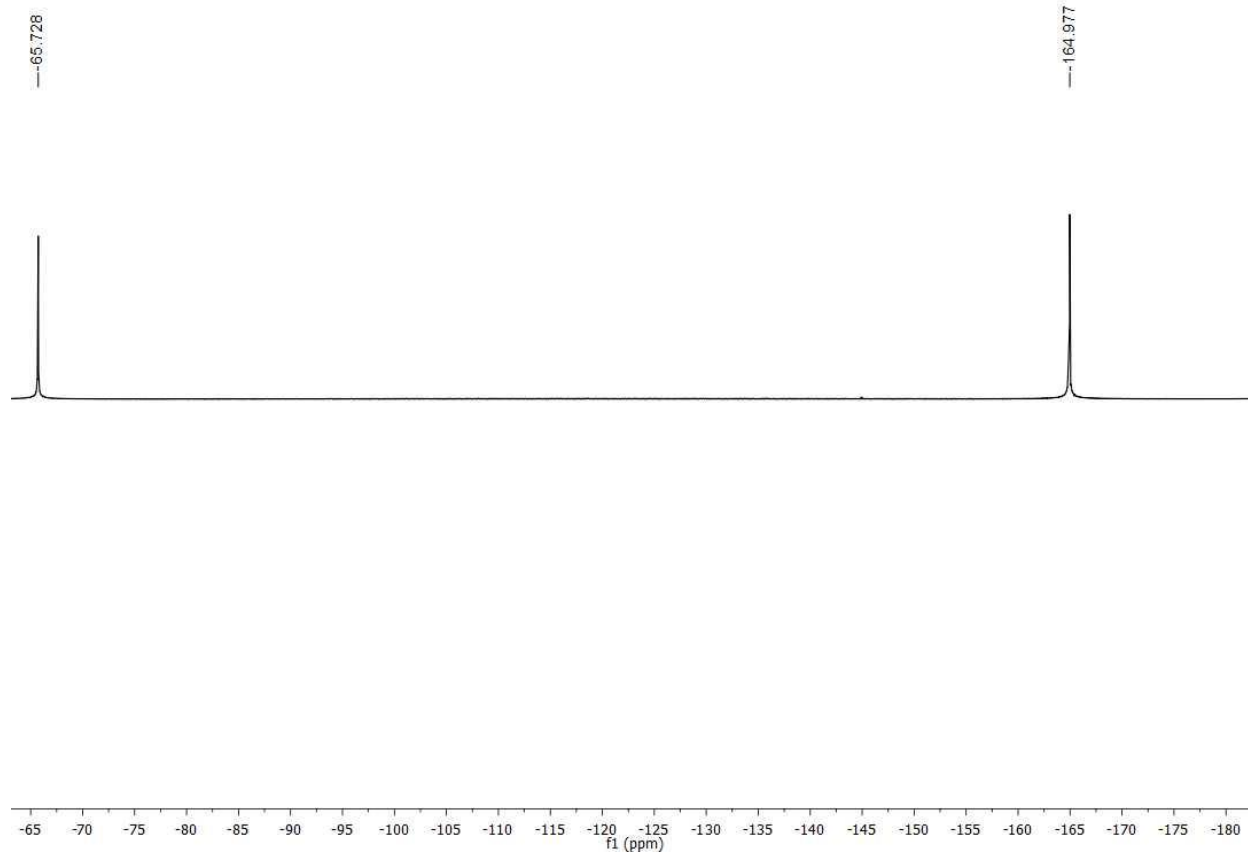

# $^1\text{H}$ NMR, $^{13}\text{C}$ NMR and $^{19}\text{F}$ NMR Spectra of compound 3q

AP-1236-1H/1

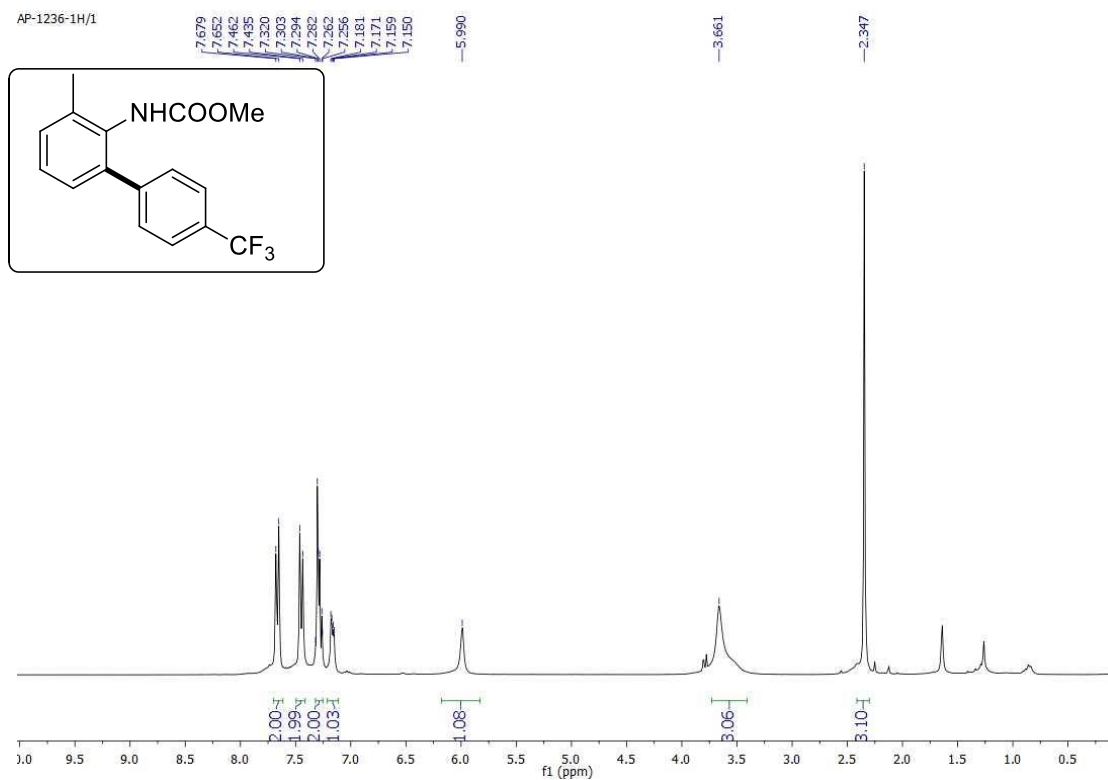

AP-1236-C/1

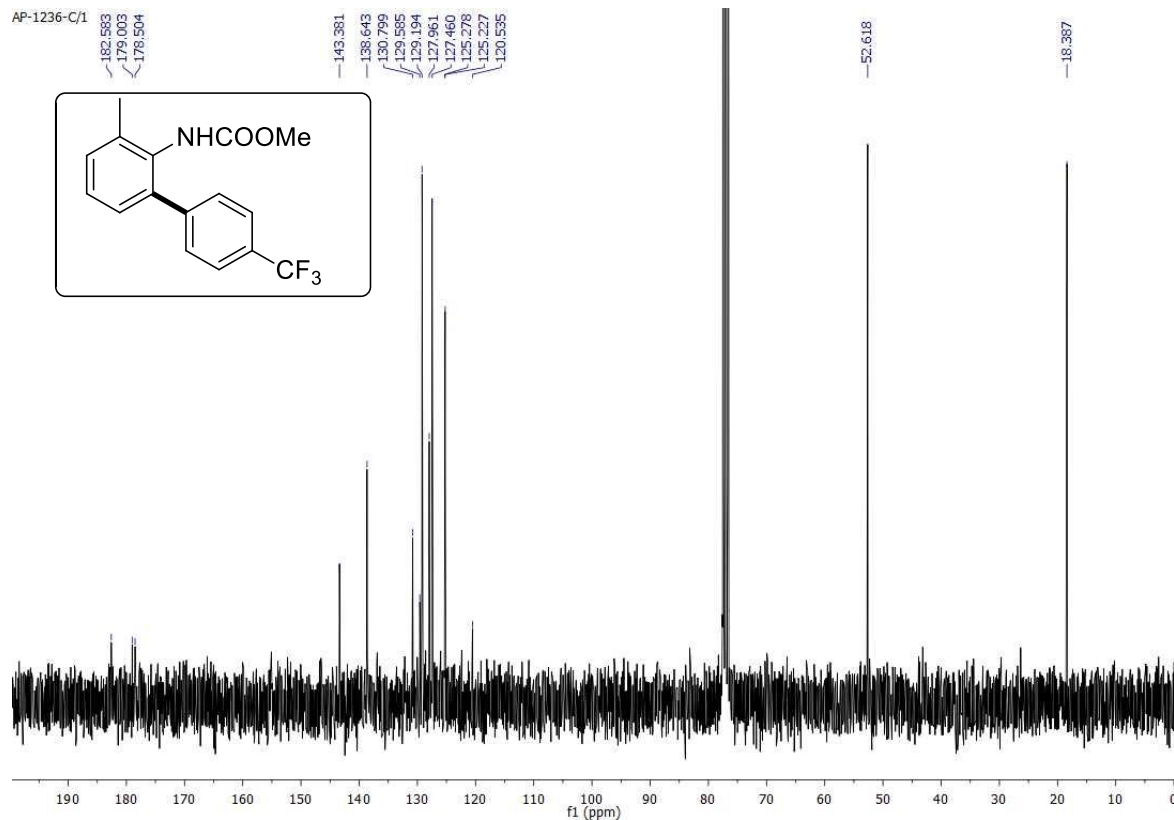

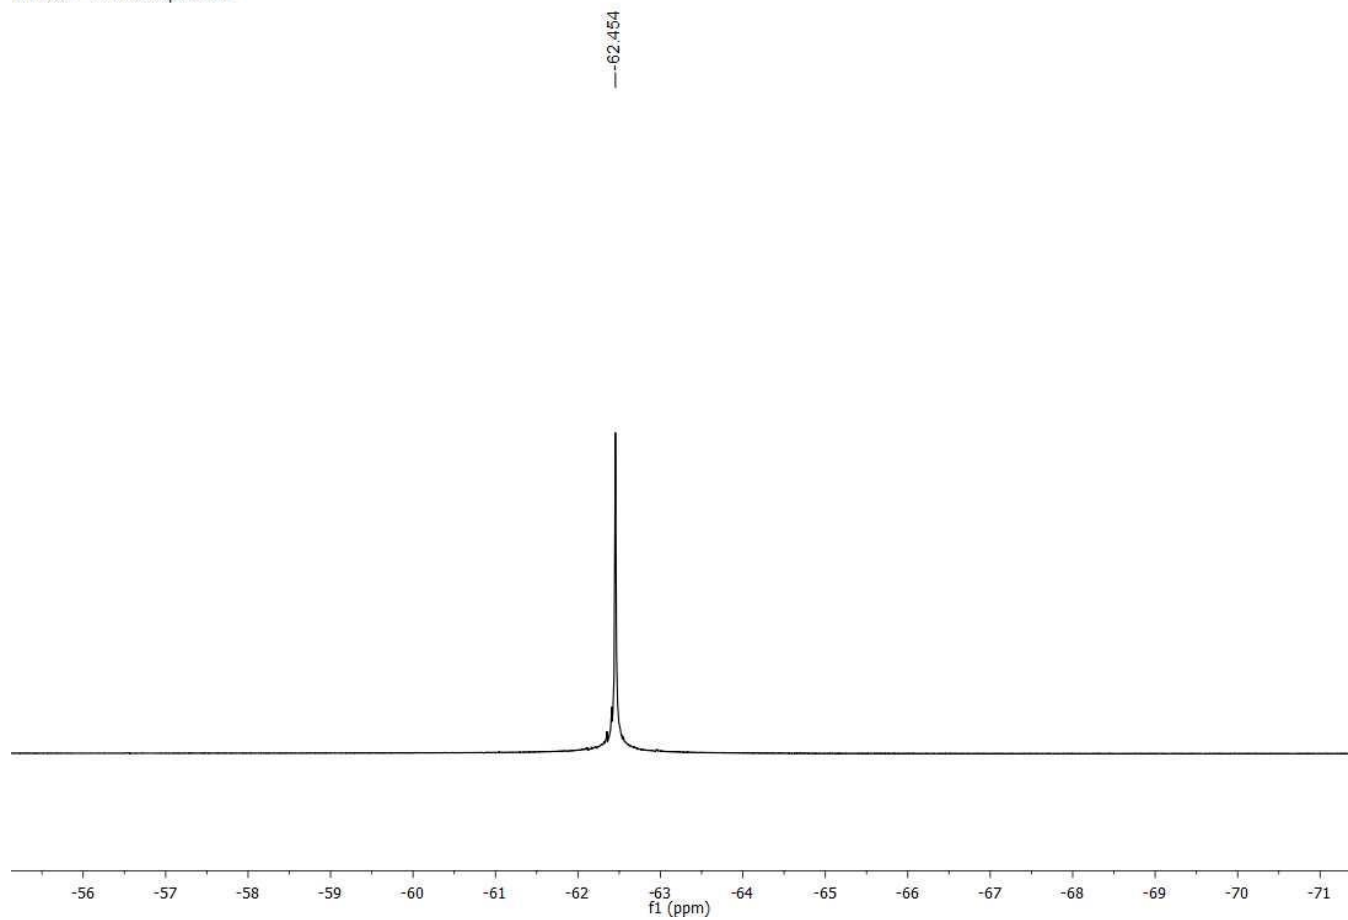



# $^1\text{H}$ NMR and $^{13}\text{C}$ NMR Spectra of compound 3r

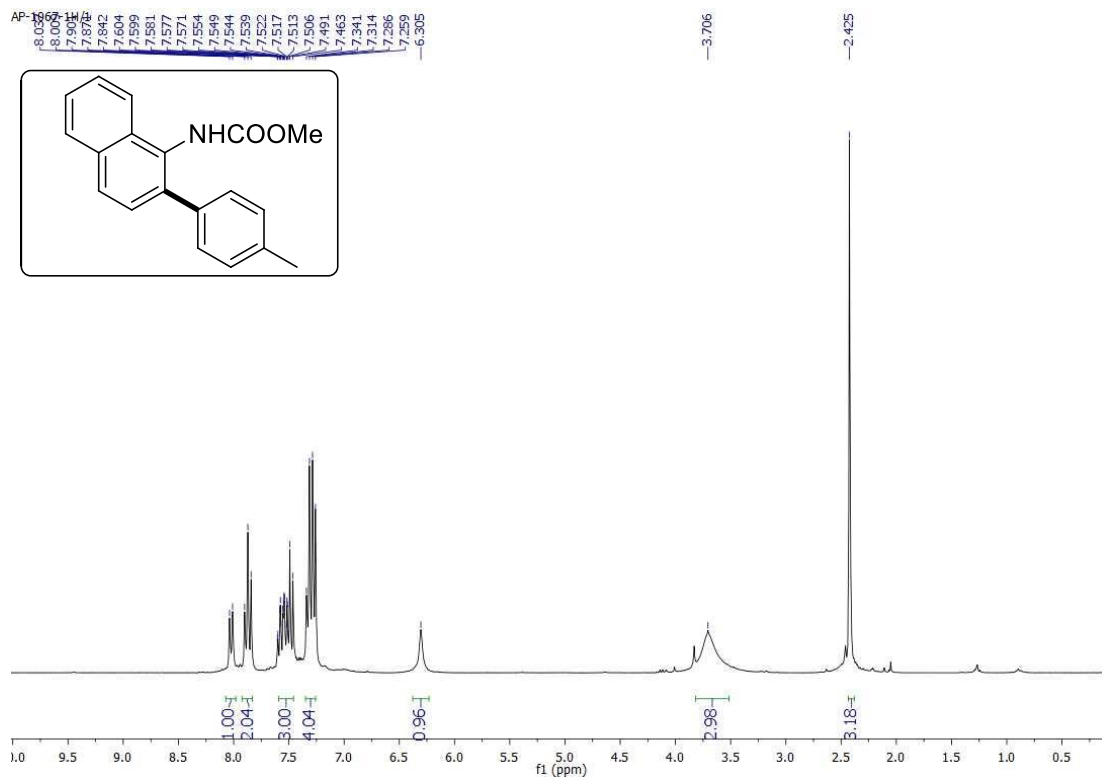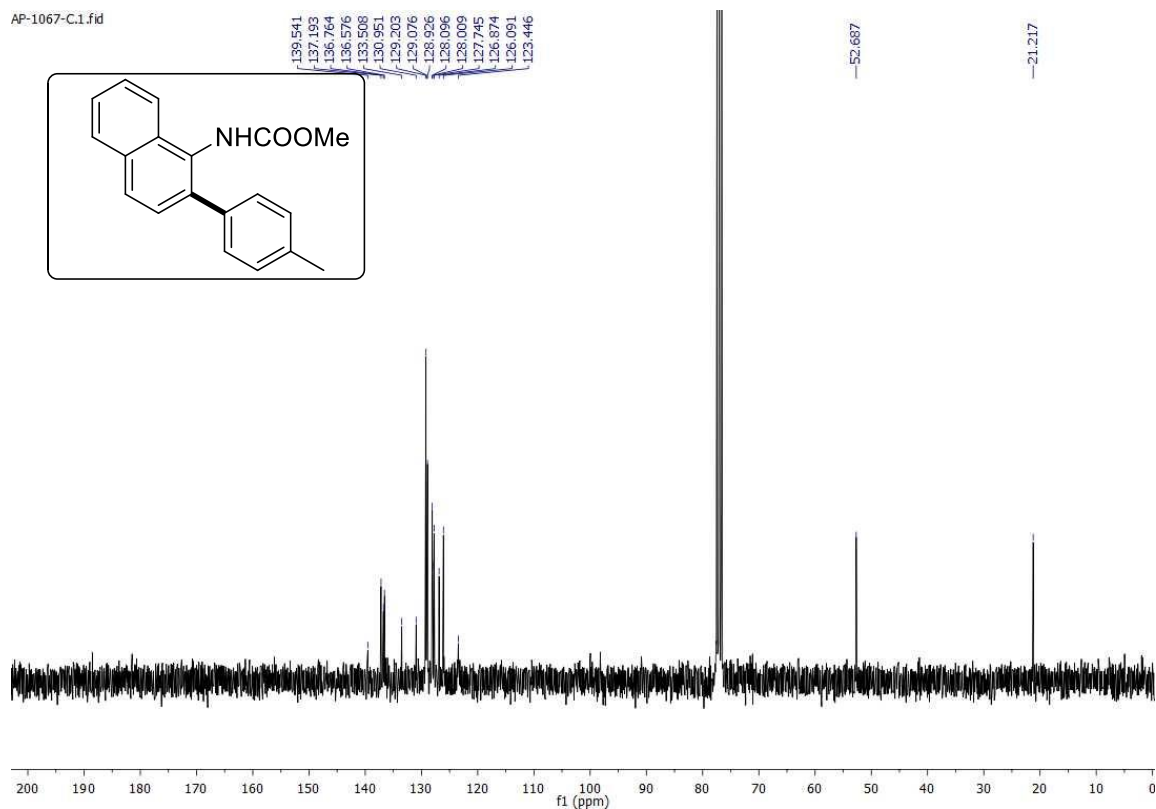

# <sup>1</sup>H NMR and <sup>13</sup>C NMR Spectra of compound 3s

AP-1124-1H/1

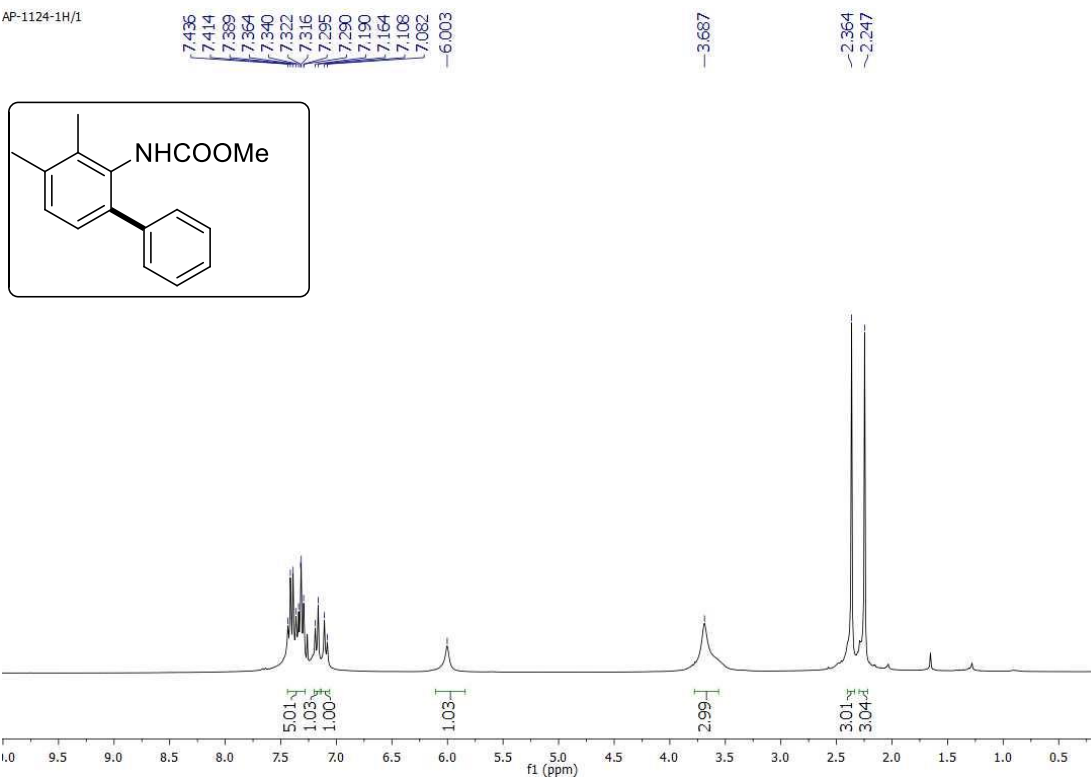

NMR FOR PUBLICATION/AP-1124 c  
AP-1124 <sup>13</sup>C-NMR in CDCl<sub>3</sub>

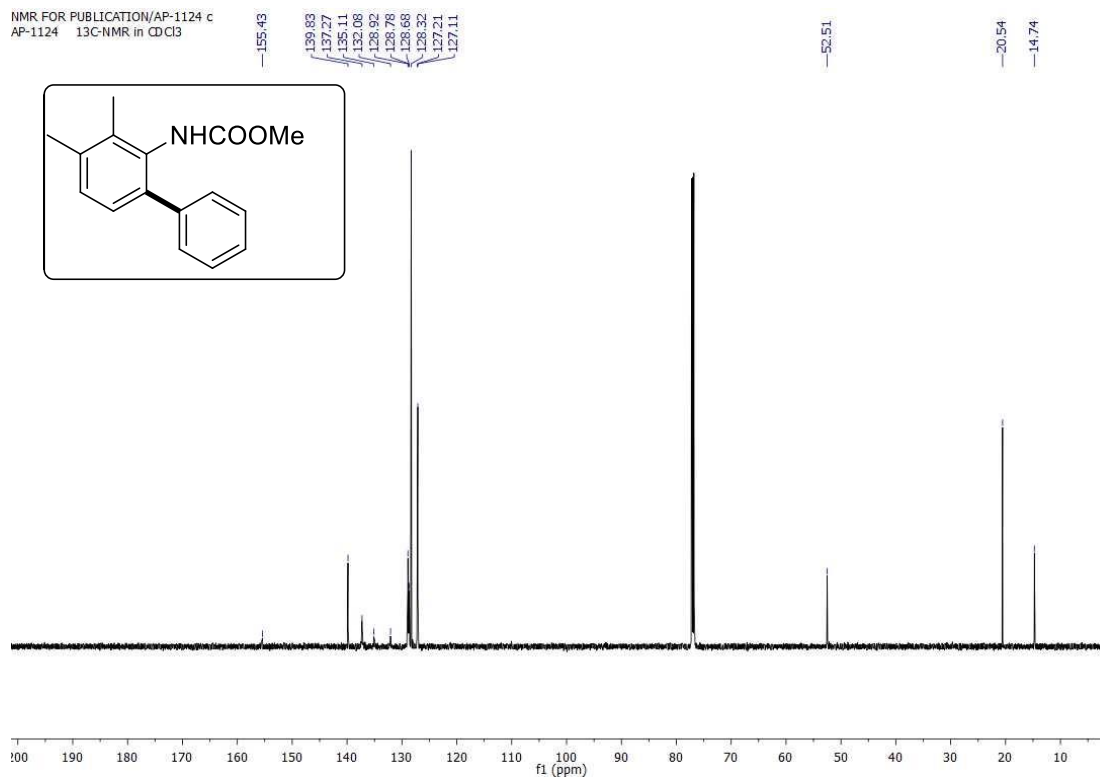

# <sup>1</sup>H NMR and <sup>13</sup>C NMR Spectra of compound 3t

AP-1030F-1H/1

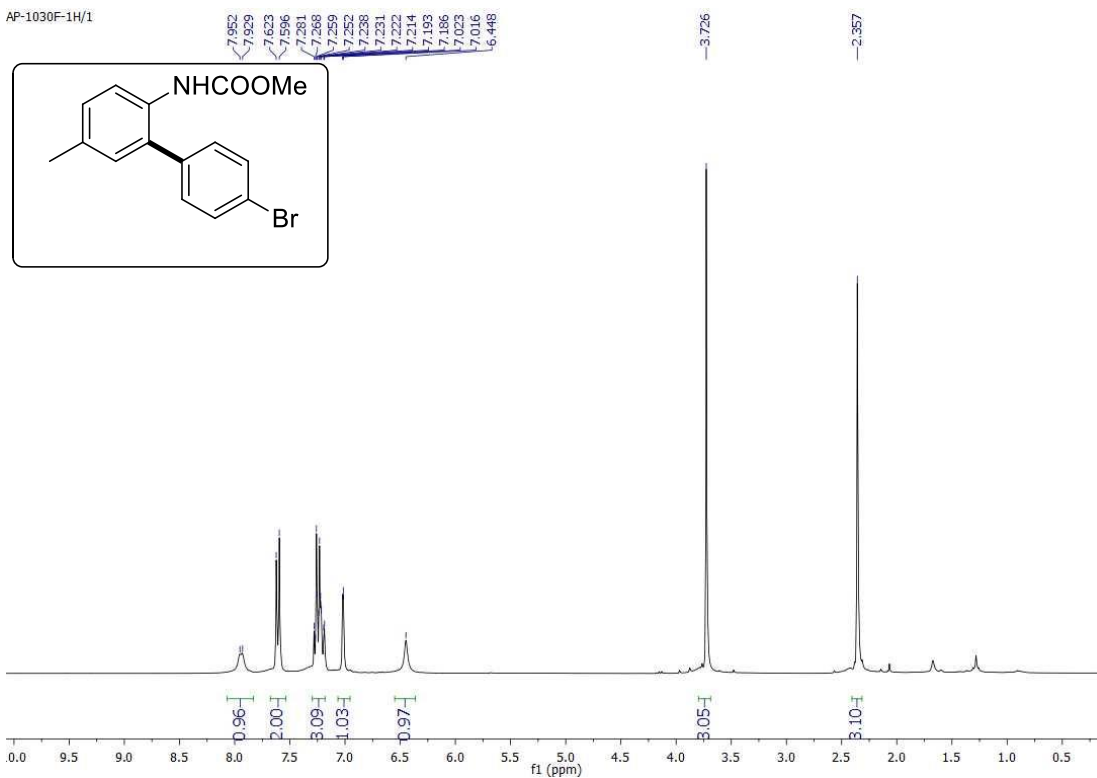

AP-1030F-C/1

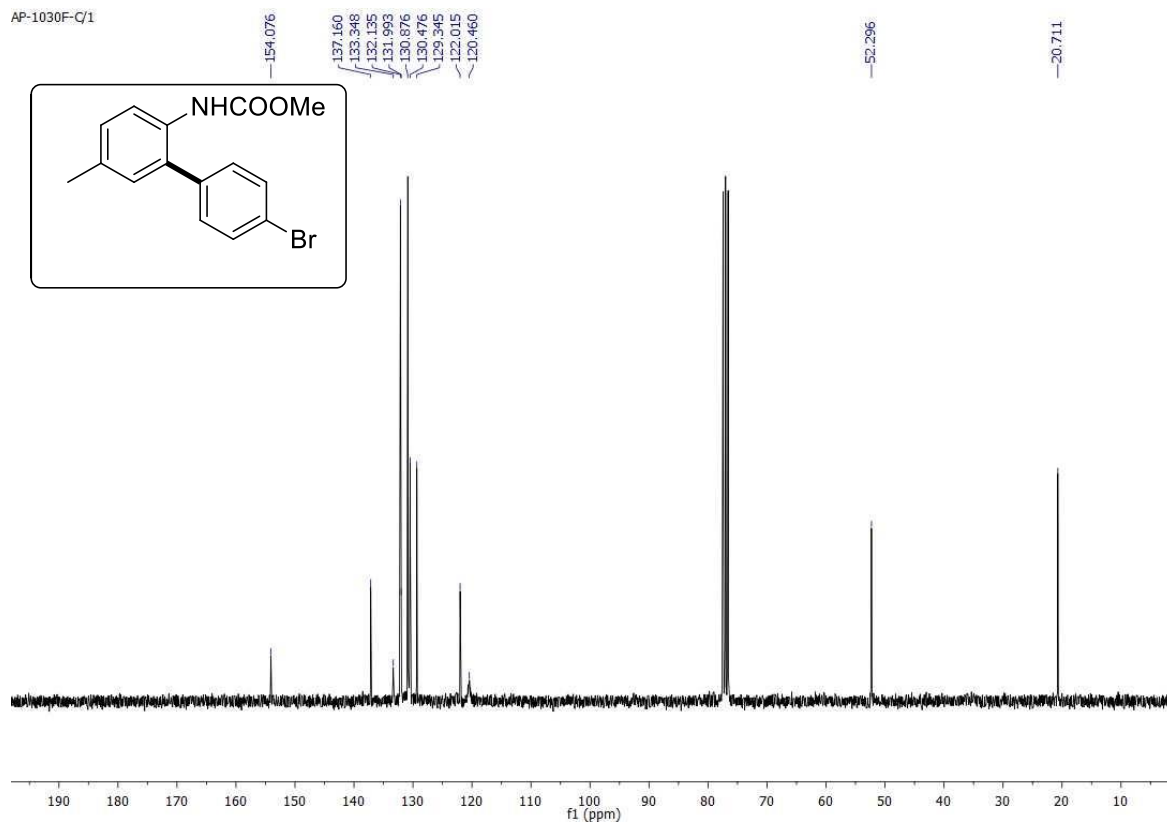

# $^1\text{H}$ NMR and $^{13}\text{C}$ NMR Spectra of compound 3u

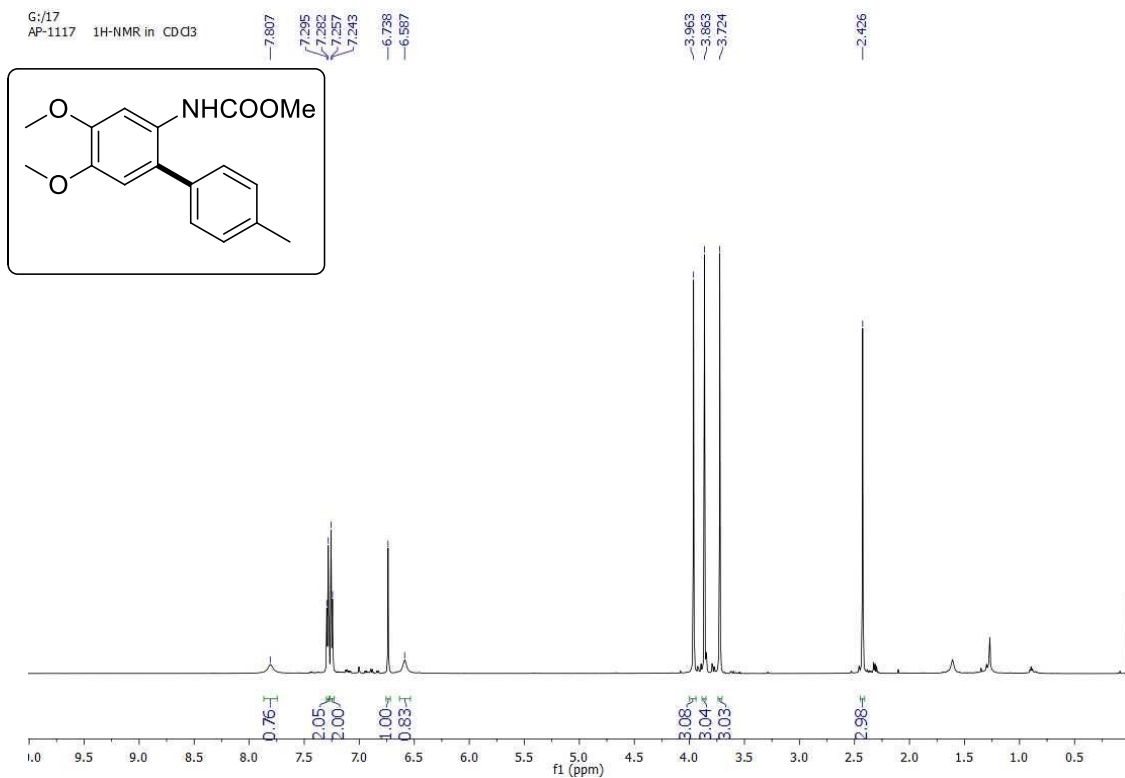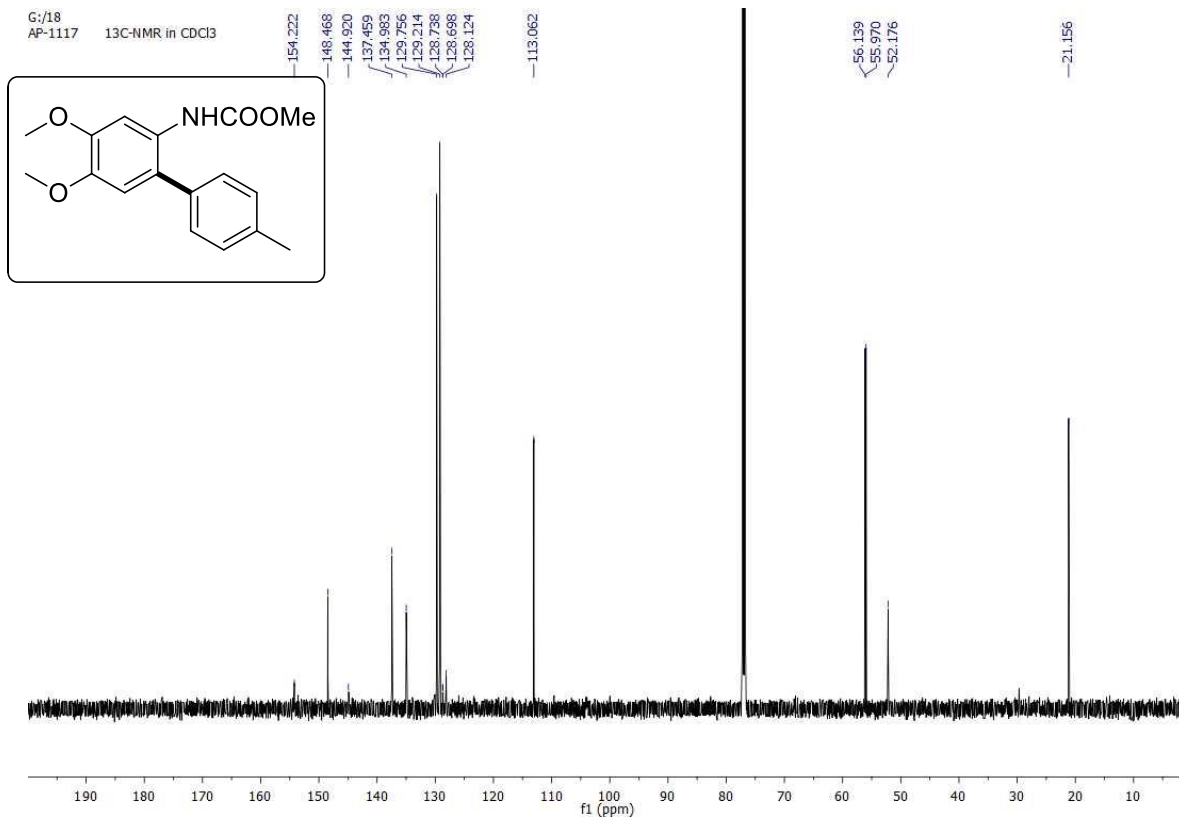

# $^1\text{H}$ NMR and $^{13}\text{C}$ NMR Spectra of compound 3v

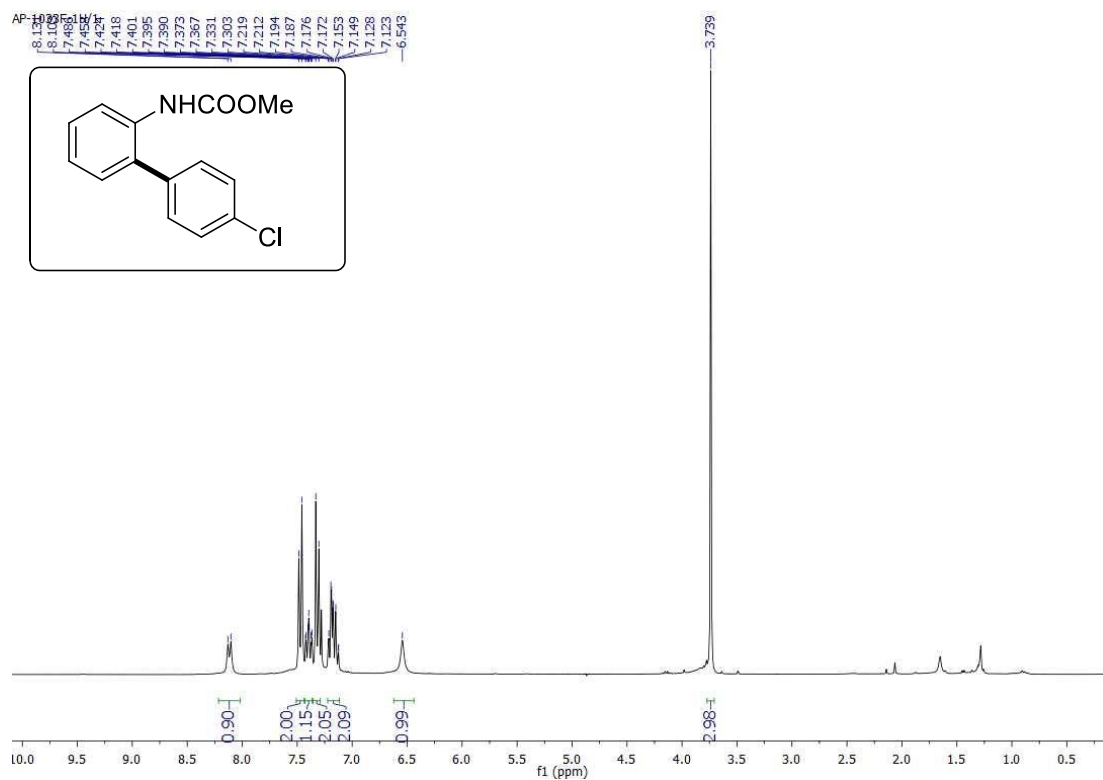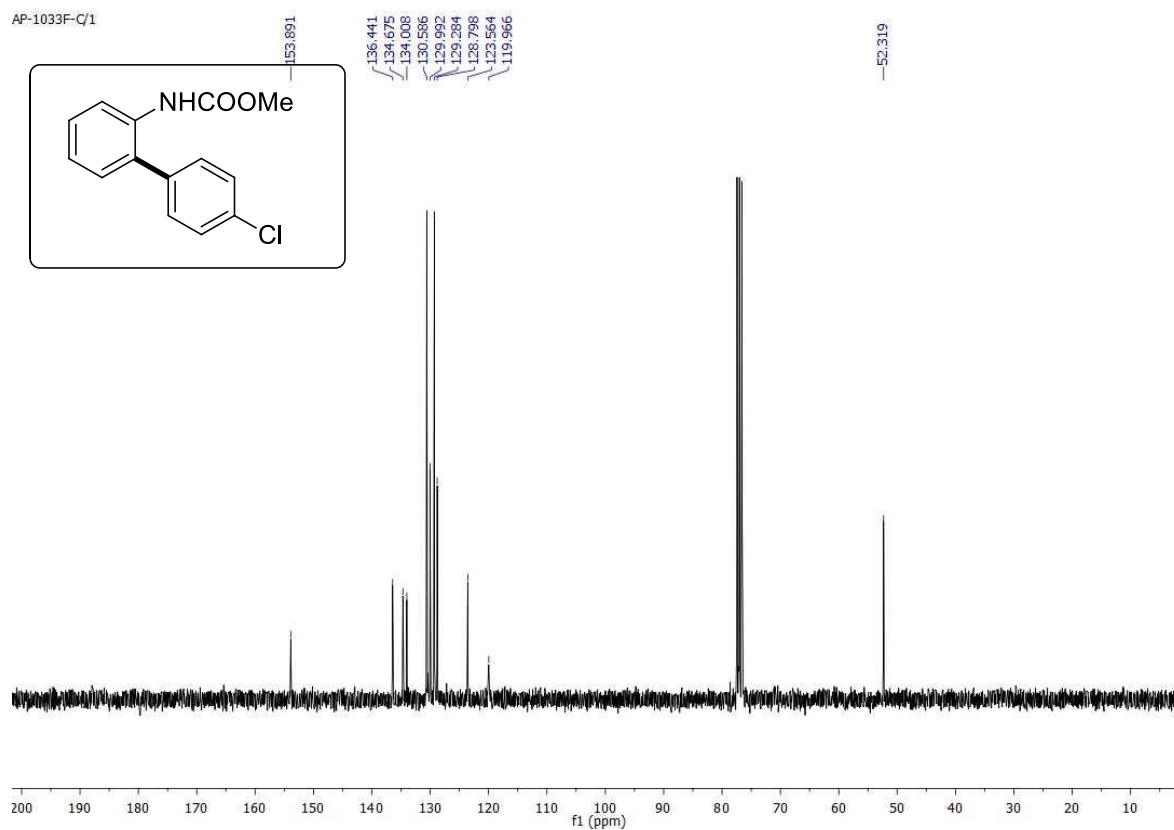

# $^1\text{H}$ NMR and $^{13}\text{C}$ NMR Spectra of compound 3w

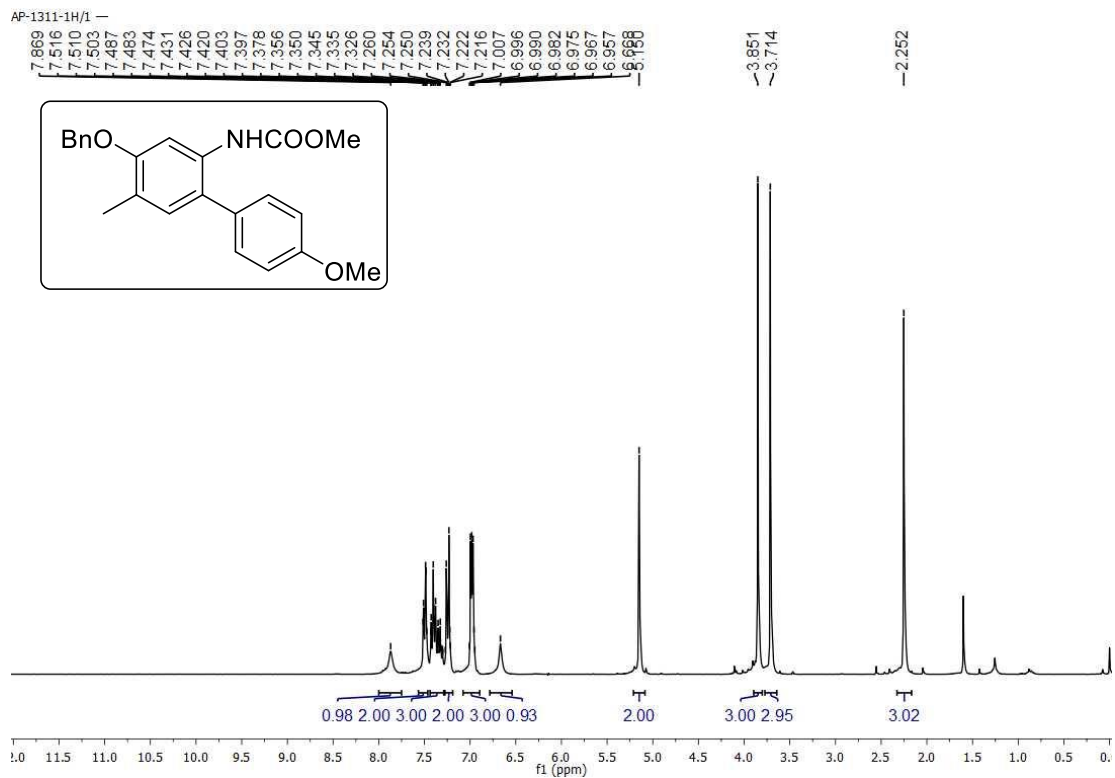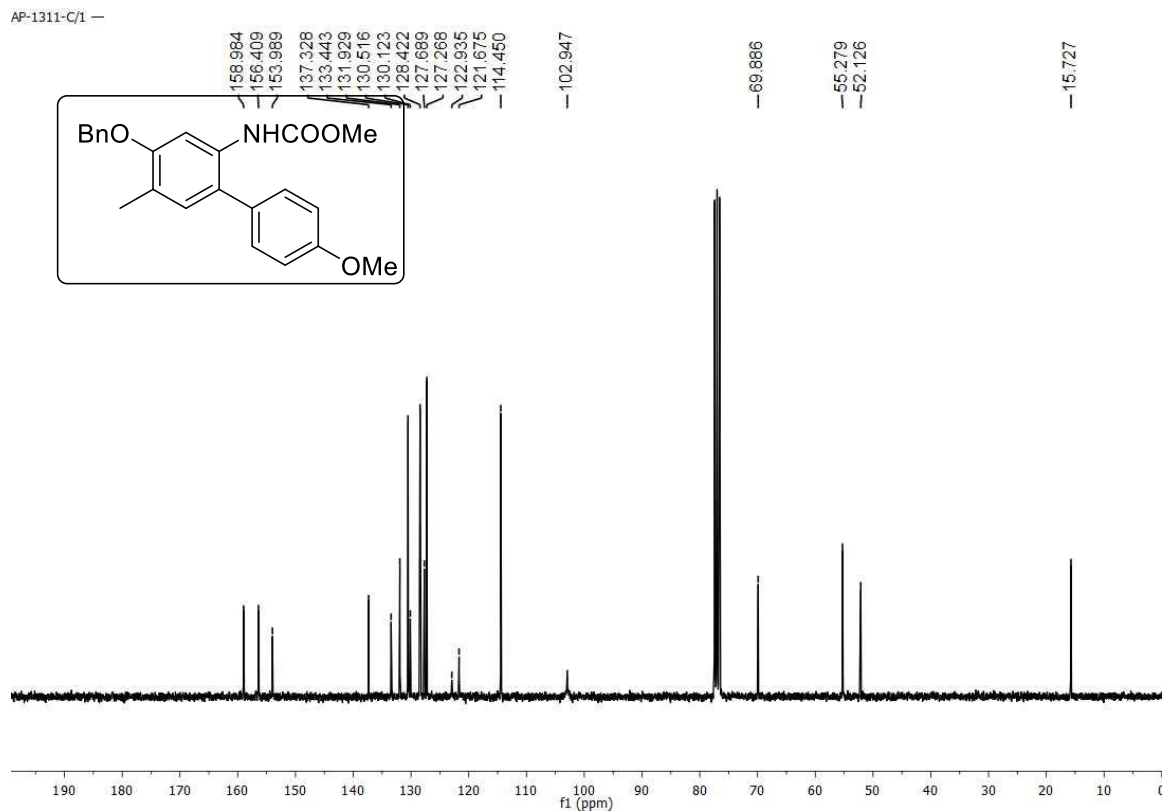

# $^1\text{H}$ NMR and $^{13}\text{C}$ NMR Spectra of compound 4

AP-1317 — single\_pulse

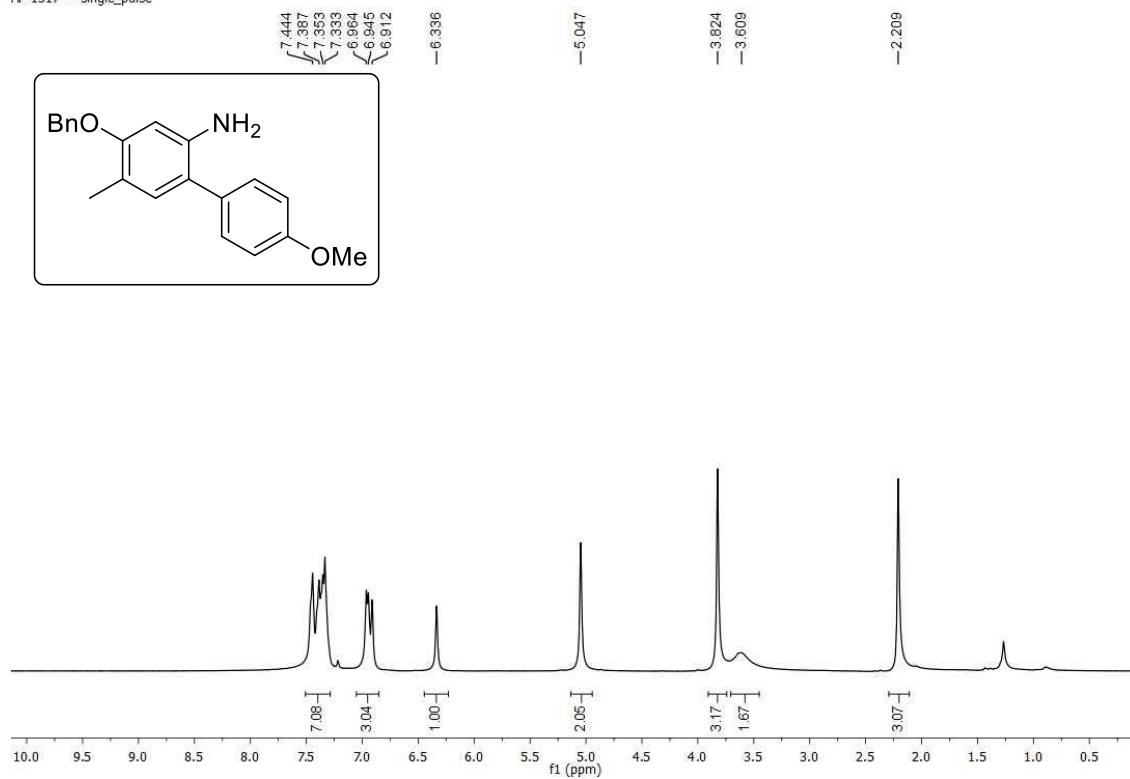

AP-1317 — single pulse decoupled gated NOE

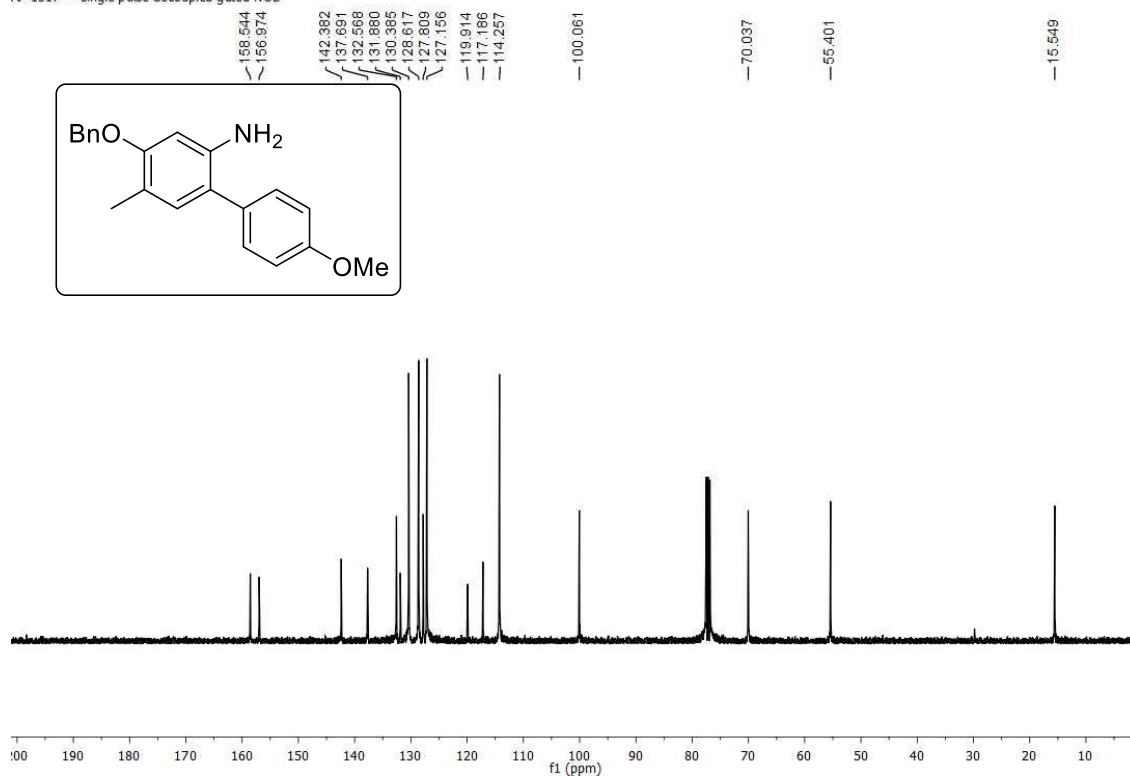

# $^1\text{H}$ NMR and $^{13}\text{C}$ NMR Spectra of compound 5

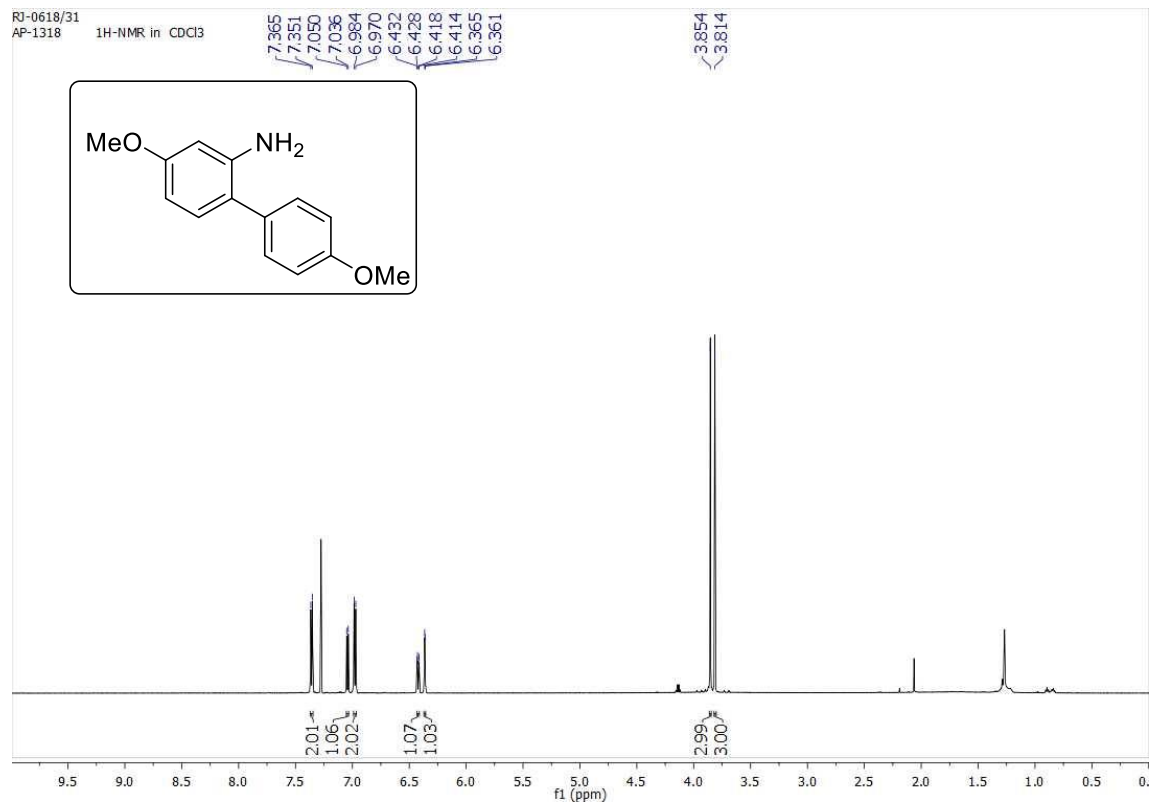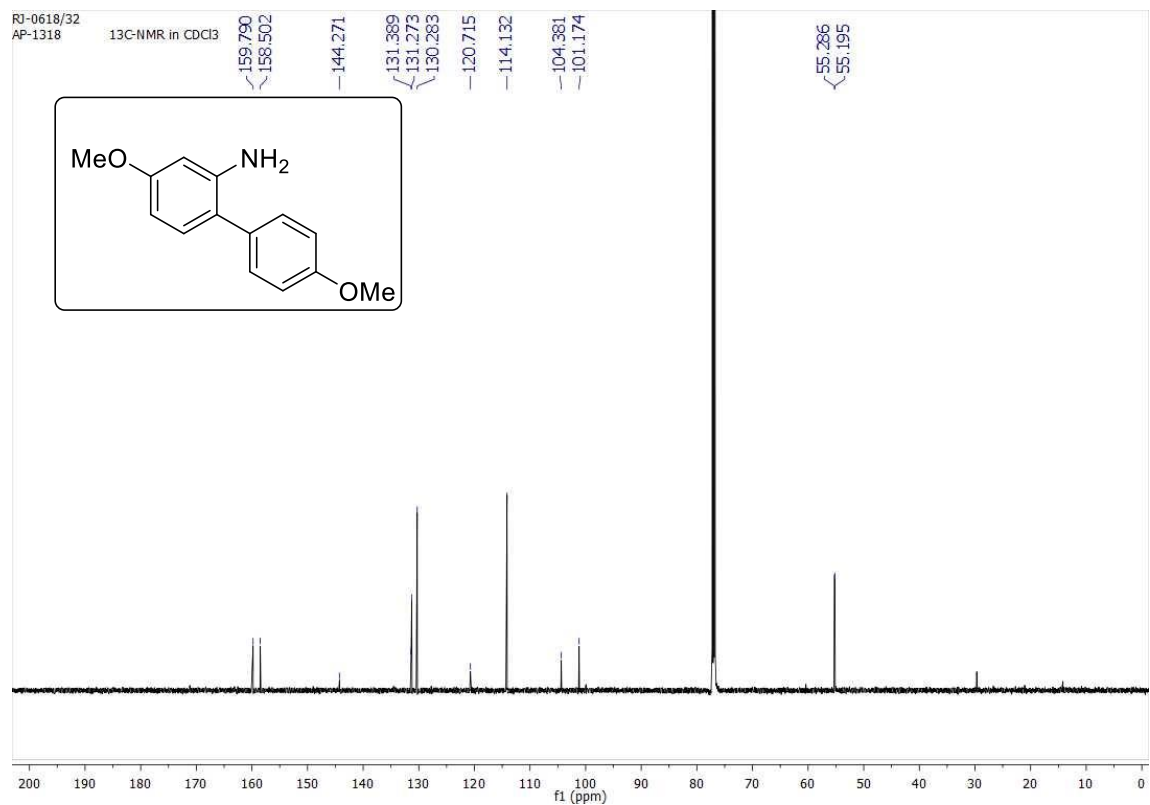



# <sup>1</sup>H NMR and <sup>13</sup>C NMR Spectra of compound 6

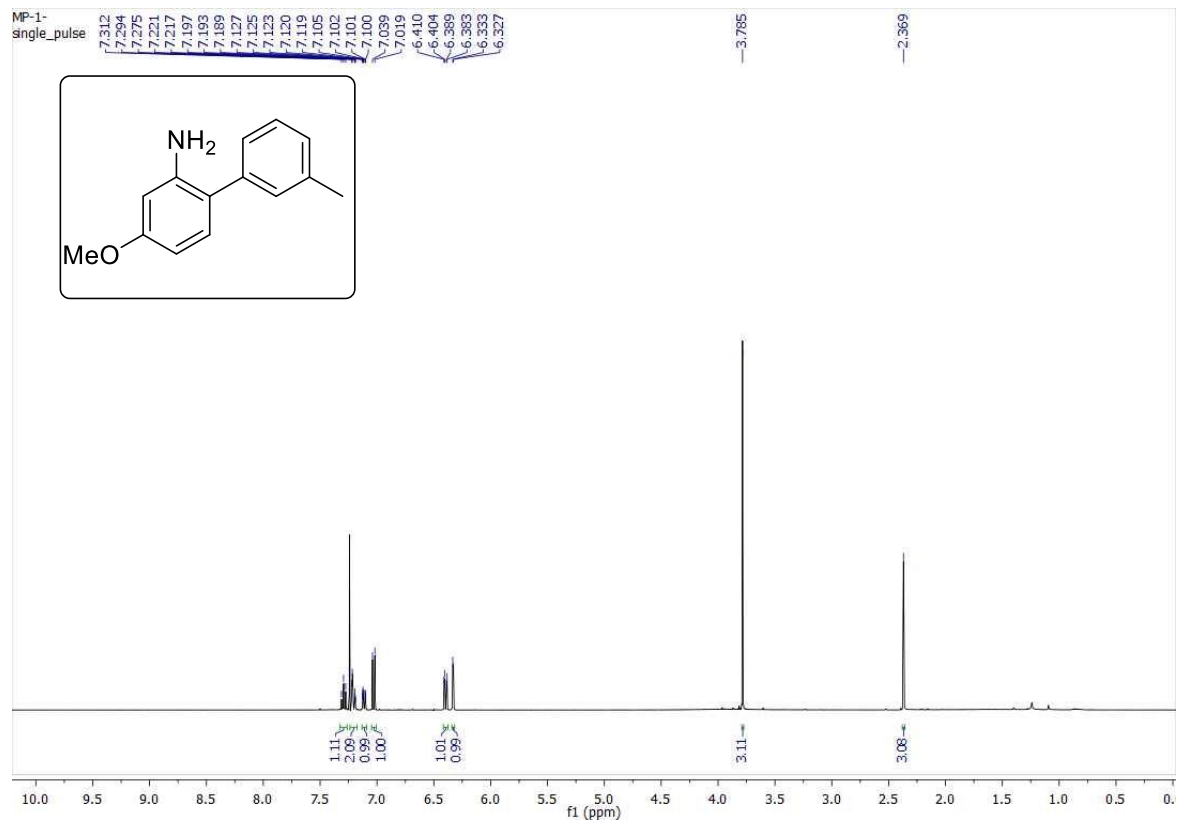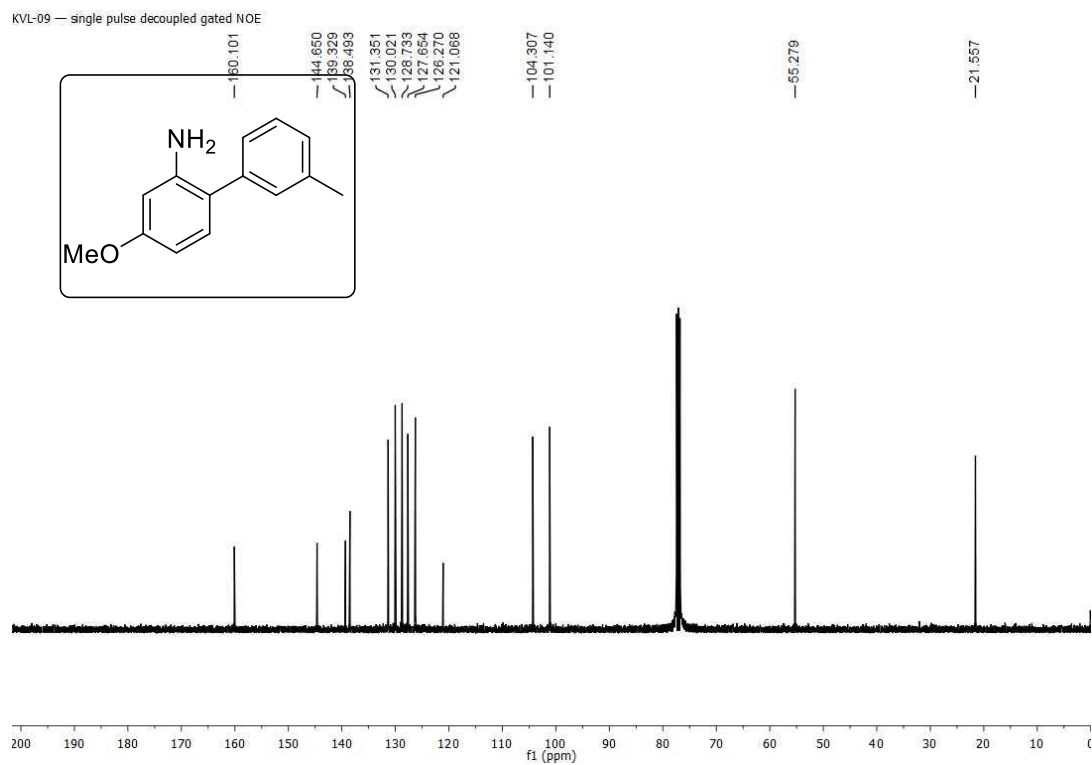

# <sup>1</sup>H NMR and <sup>13</sup>C NMR Spectra of compound 7

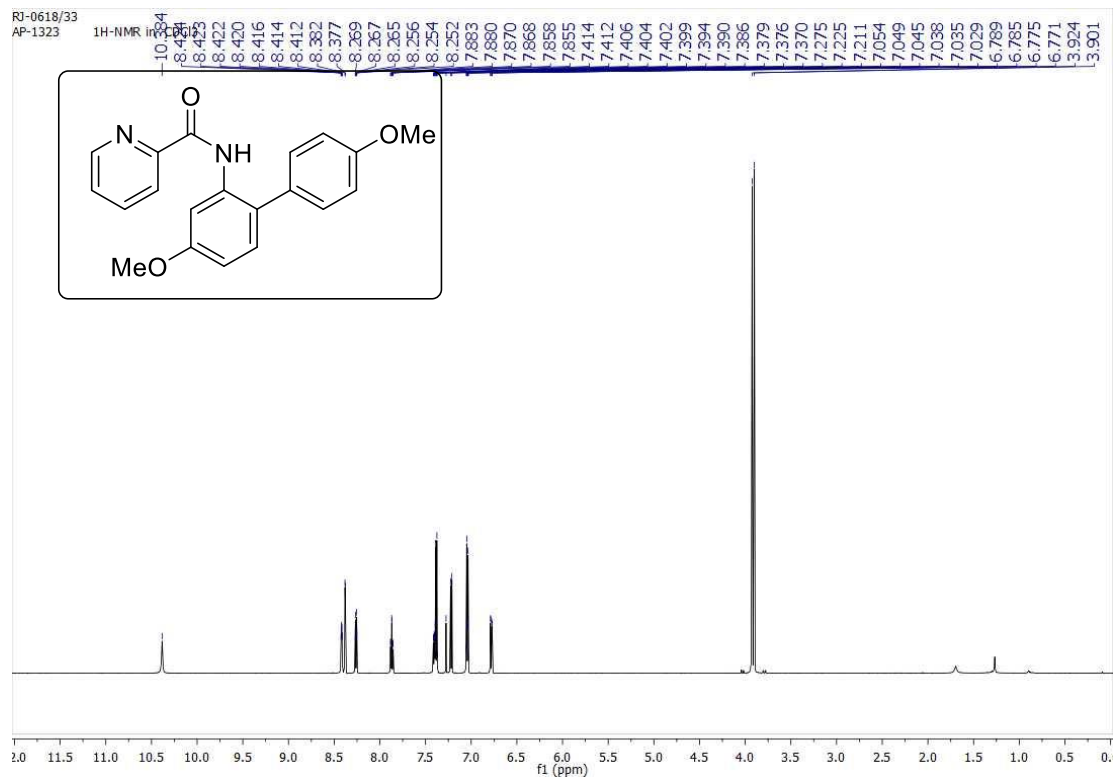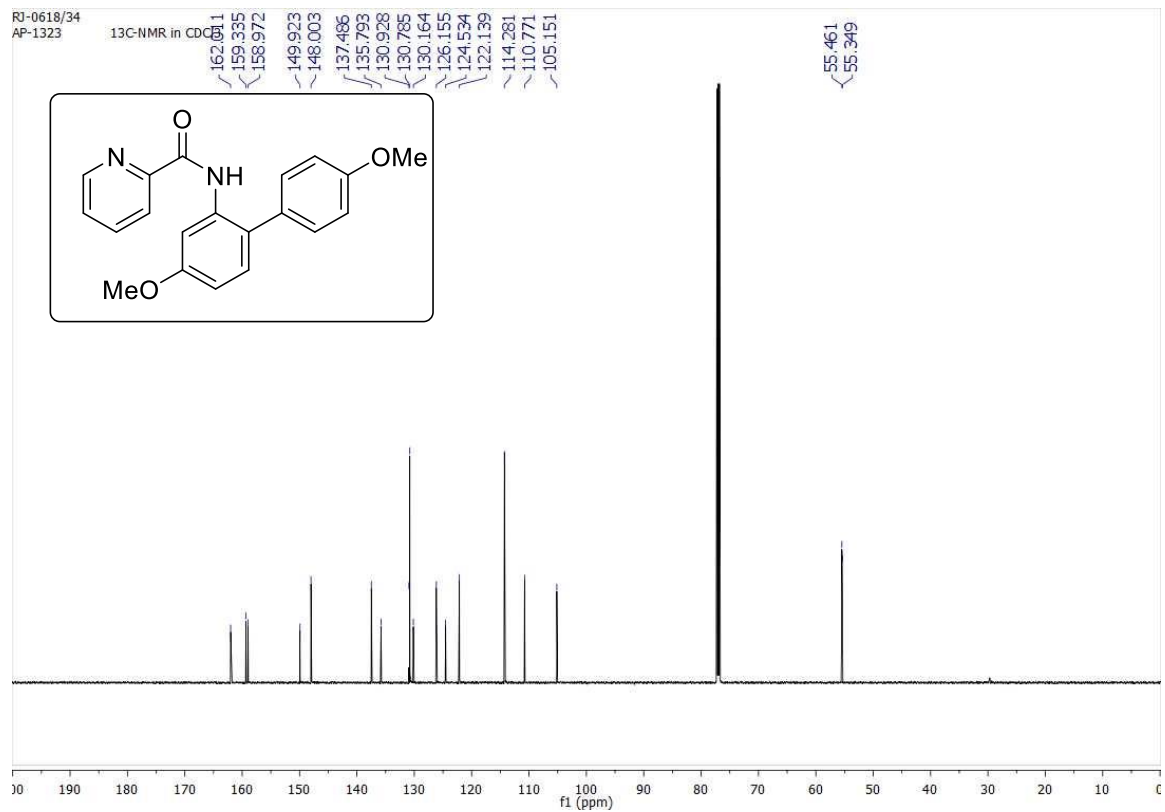

# <sup>1</sup>H NMR and <sup>13</sup>C NMR Spectra of compound 8

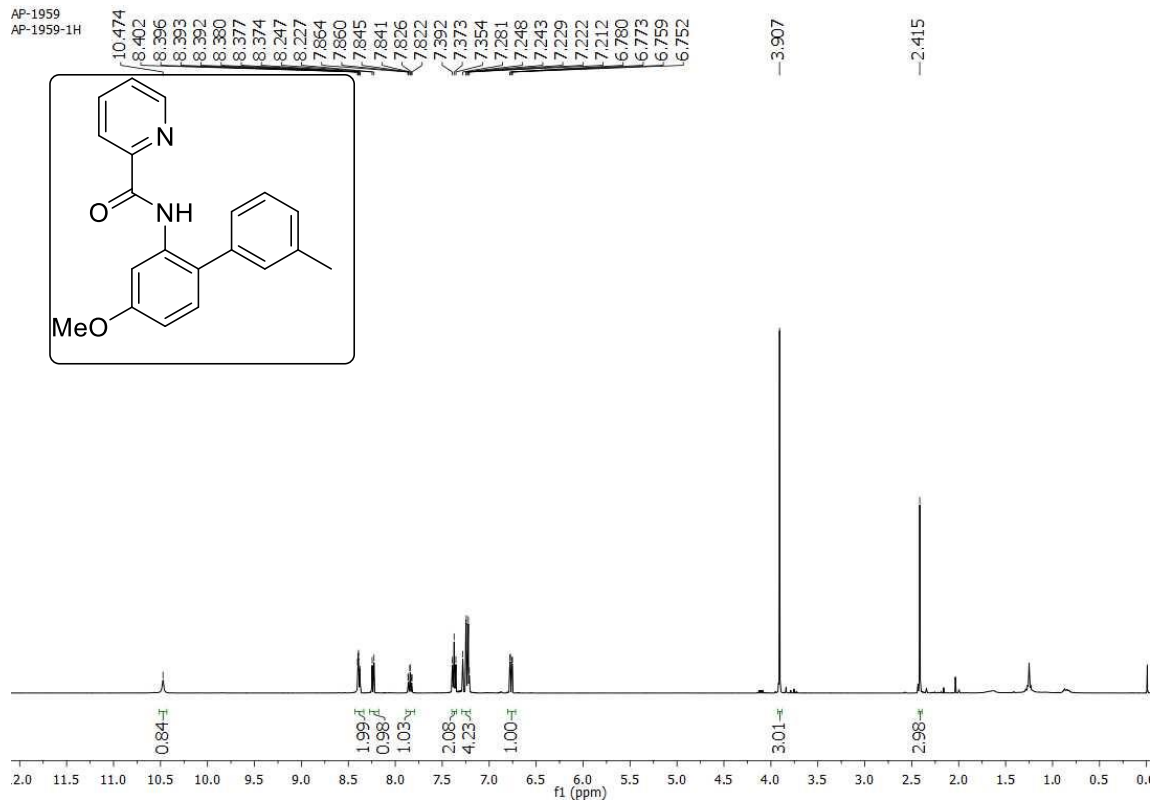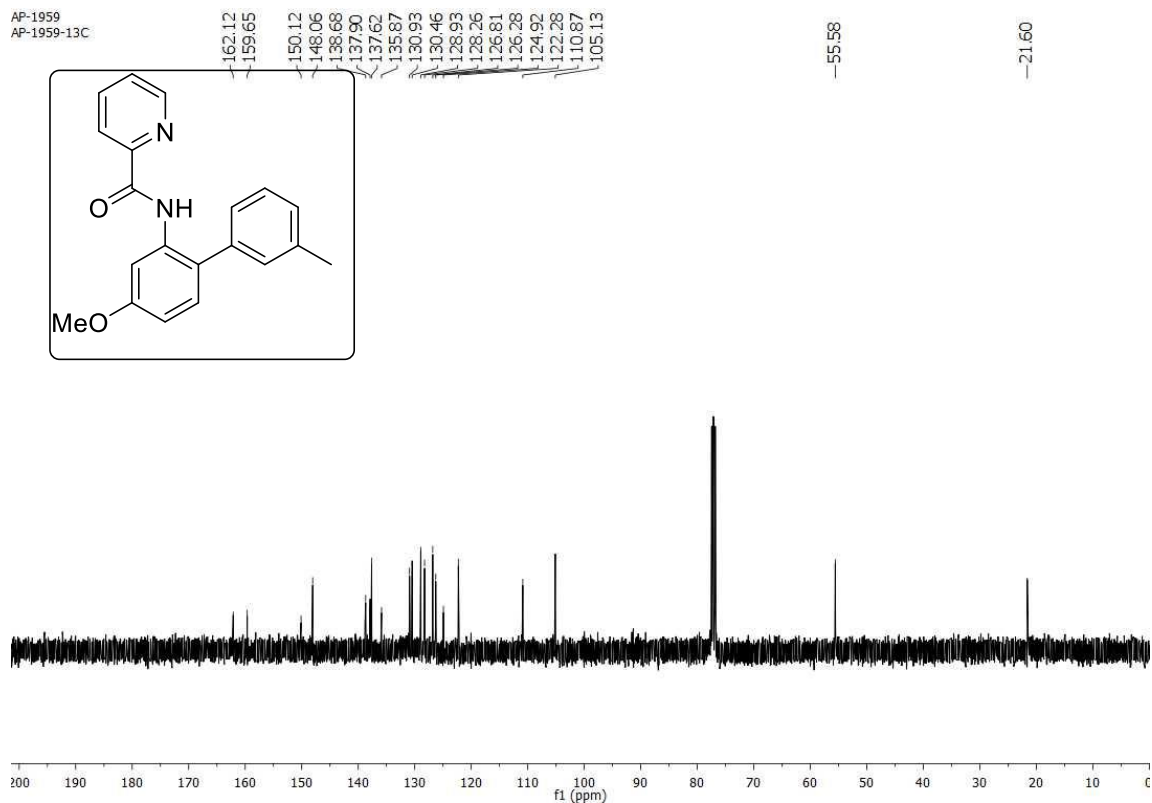

# $^1\text{H}$ NMR and $^{13}\text{C}$ NMR Spectra of compound 9

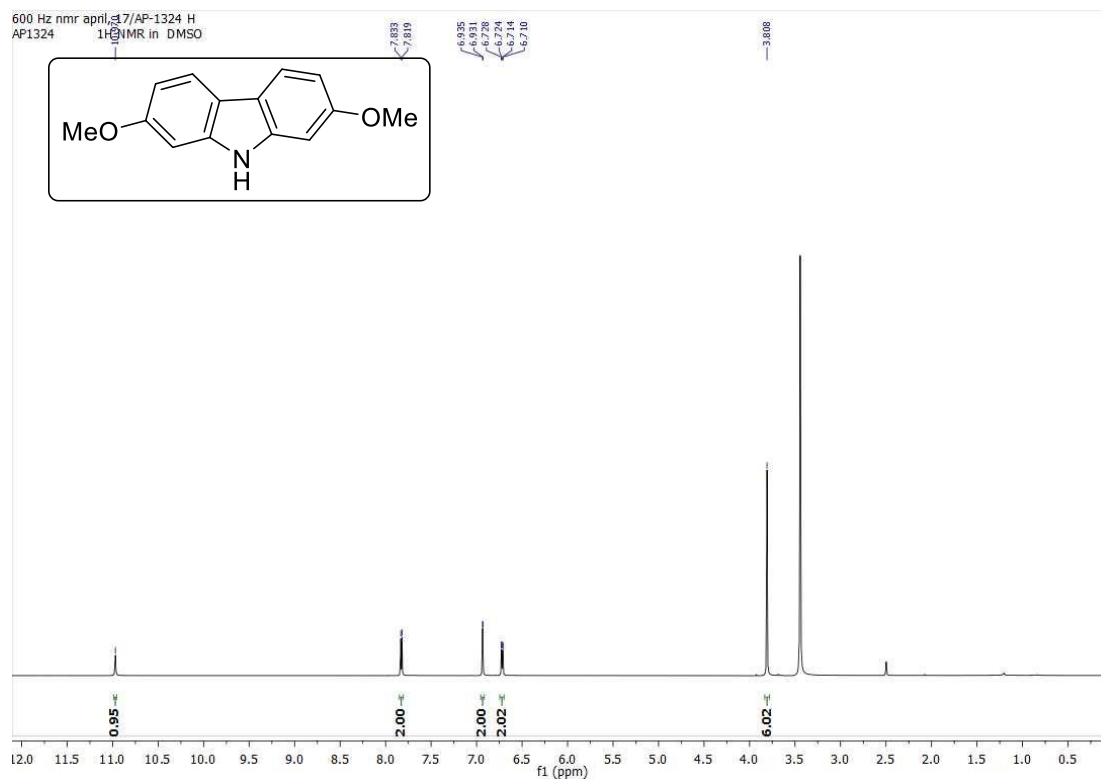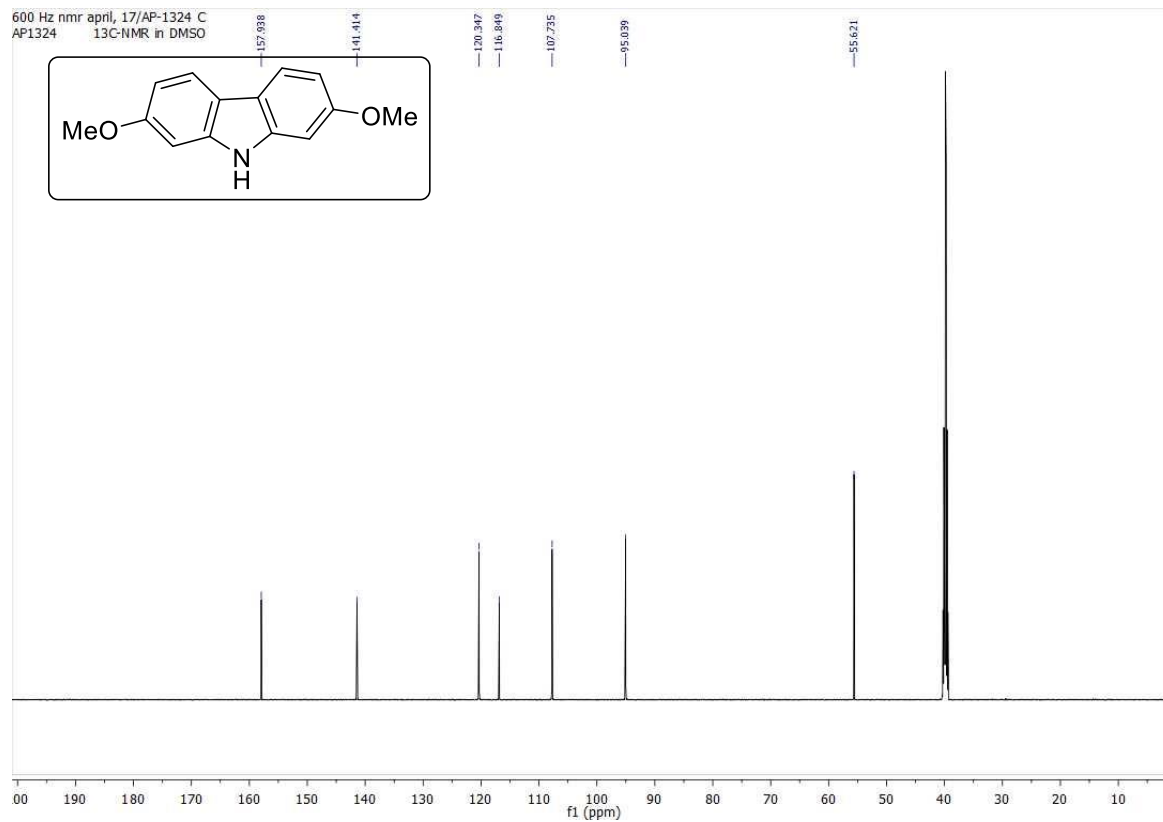

# <sup>1</sup>H NMR and <sup>13</sup>C NMR Spectra of compound 10

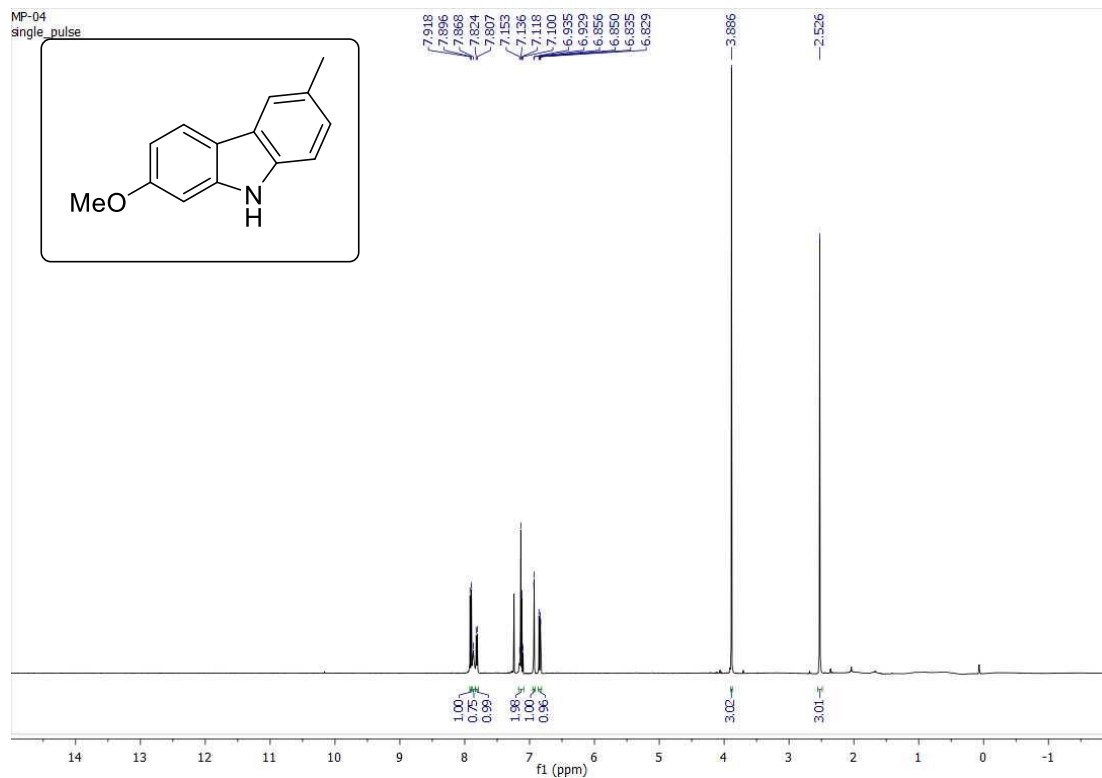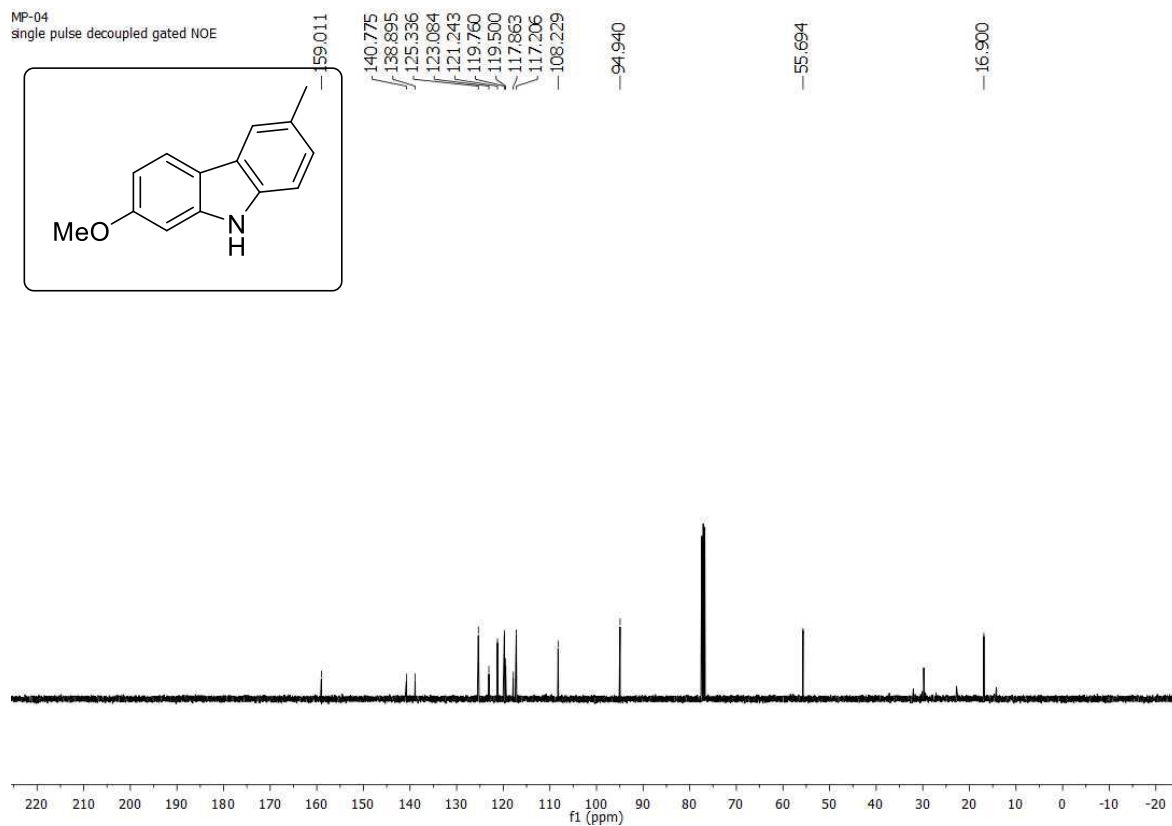

# <sup>1</sup>H NMR and <sup>13</sup>C NMR Spectra of compound 11

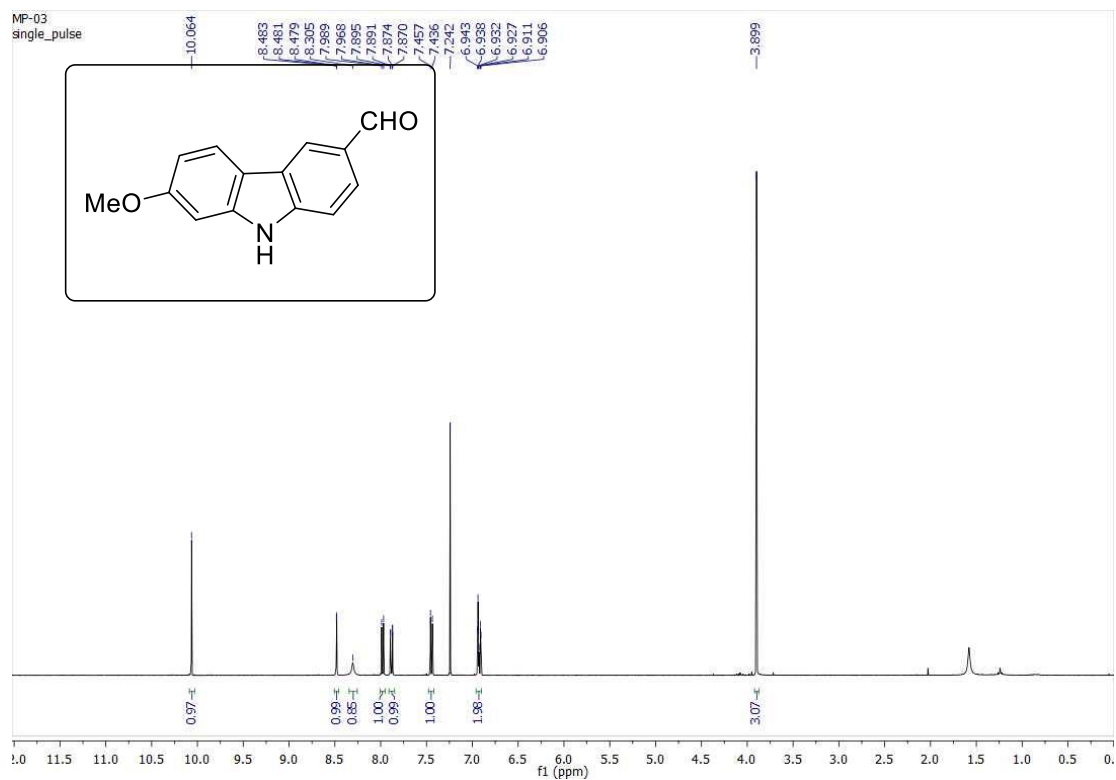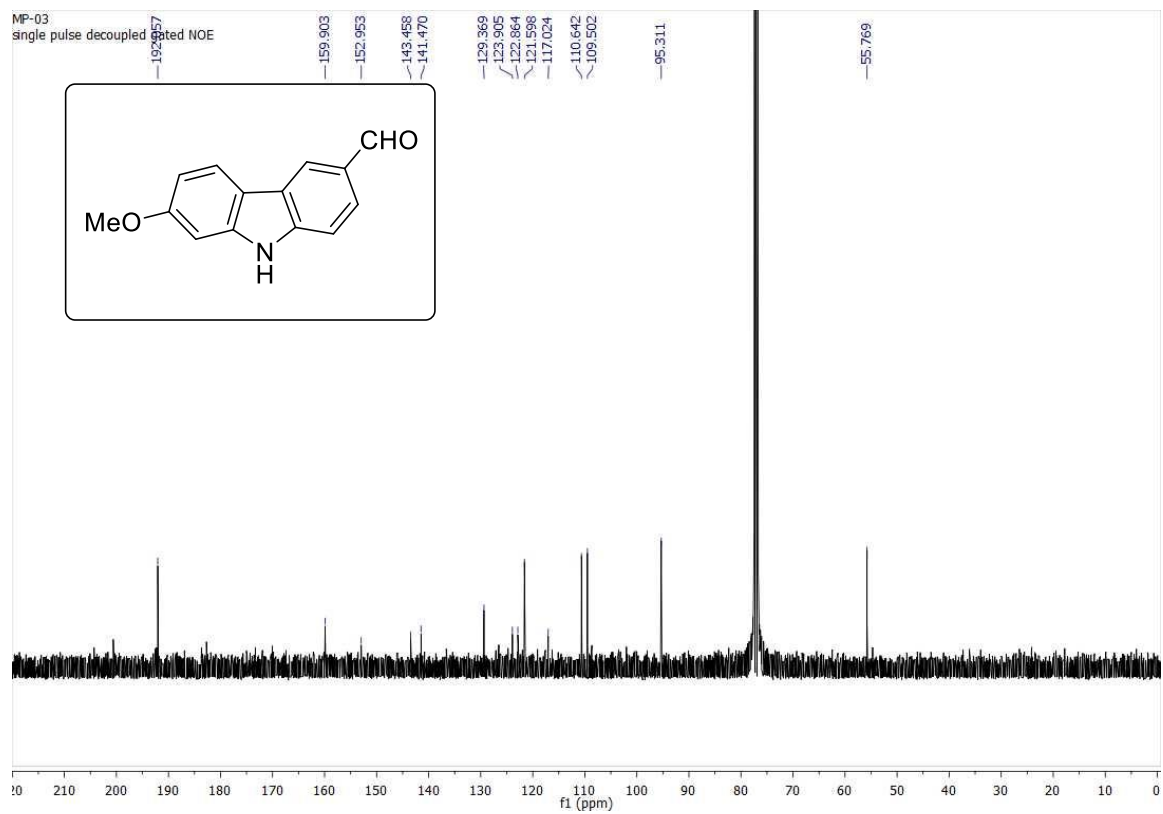

# <sup>1</sup>H NMR and <sup>13</sup>C NMR Spectra of compound 12

AP-N3 — single\_pulse

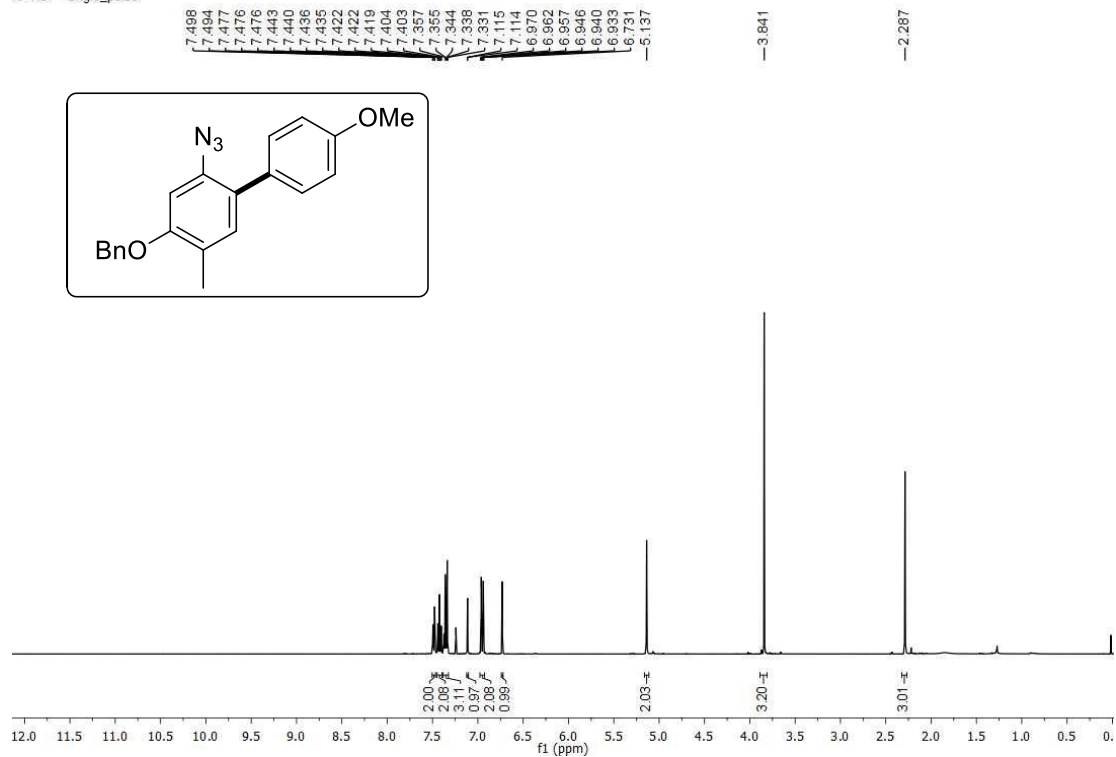

AP-N3 — single pulse decoupled gated NOE

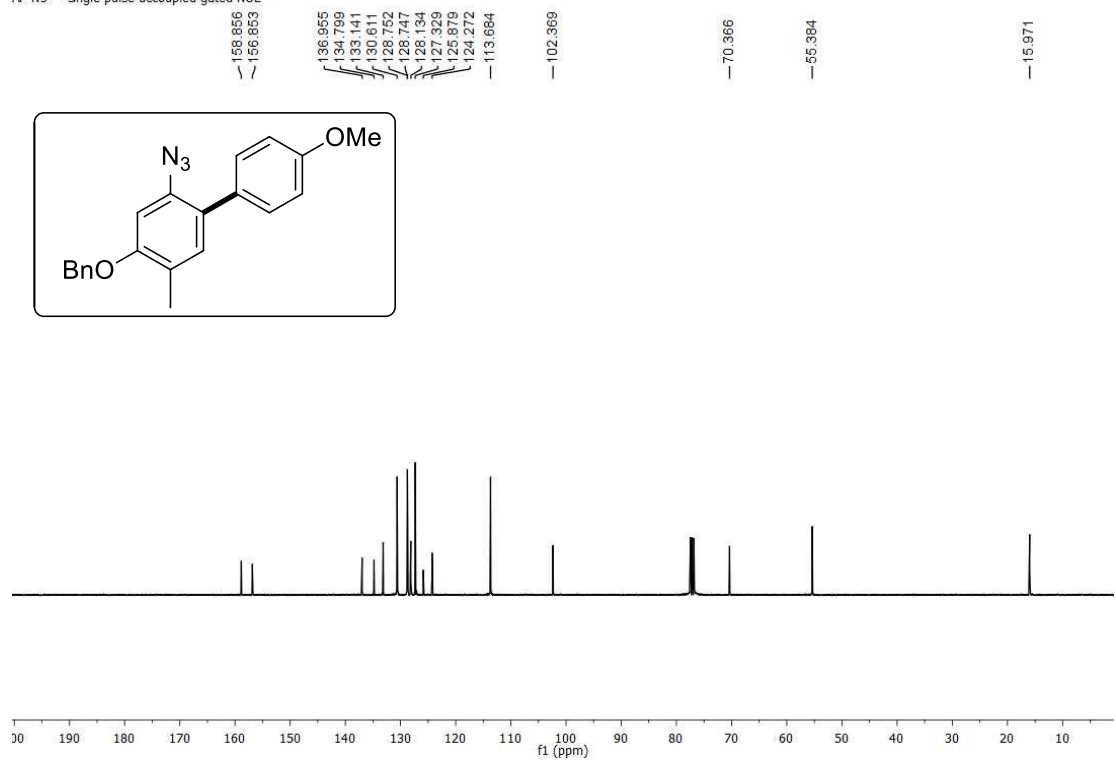

# <sup>1</sup>H NMR and <sup>13</sup>C NMR Spectra of compound 13

AP-1327 — single\_pulse

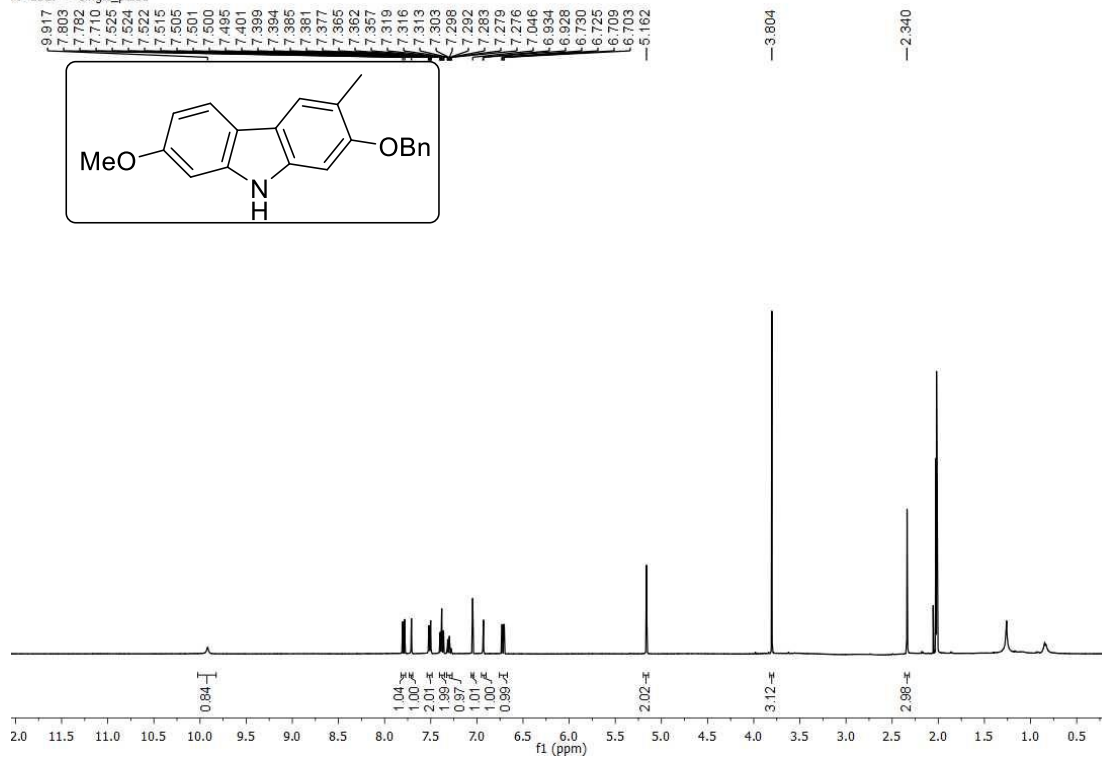

RJ-0718/28 — AP-1327

<sup>13</sup>C-NMR in Acetone-d<sub>6</sub>

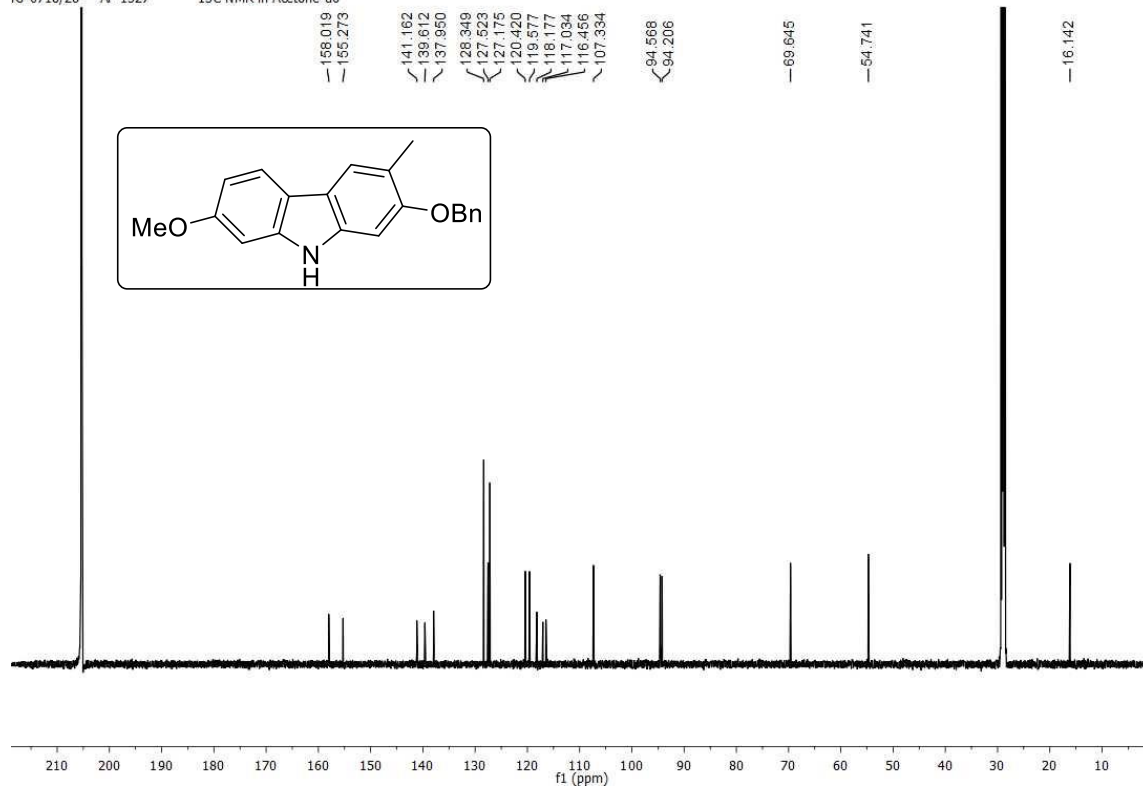



# <sup>1</sup>H NMR and <sup>13</sup>C NMR Spectra of compound 14

AP-1333 — single\_pulse

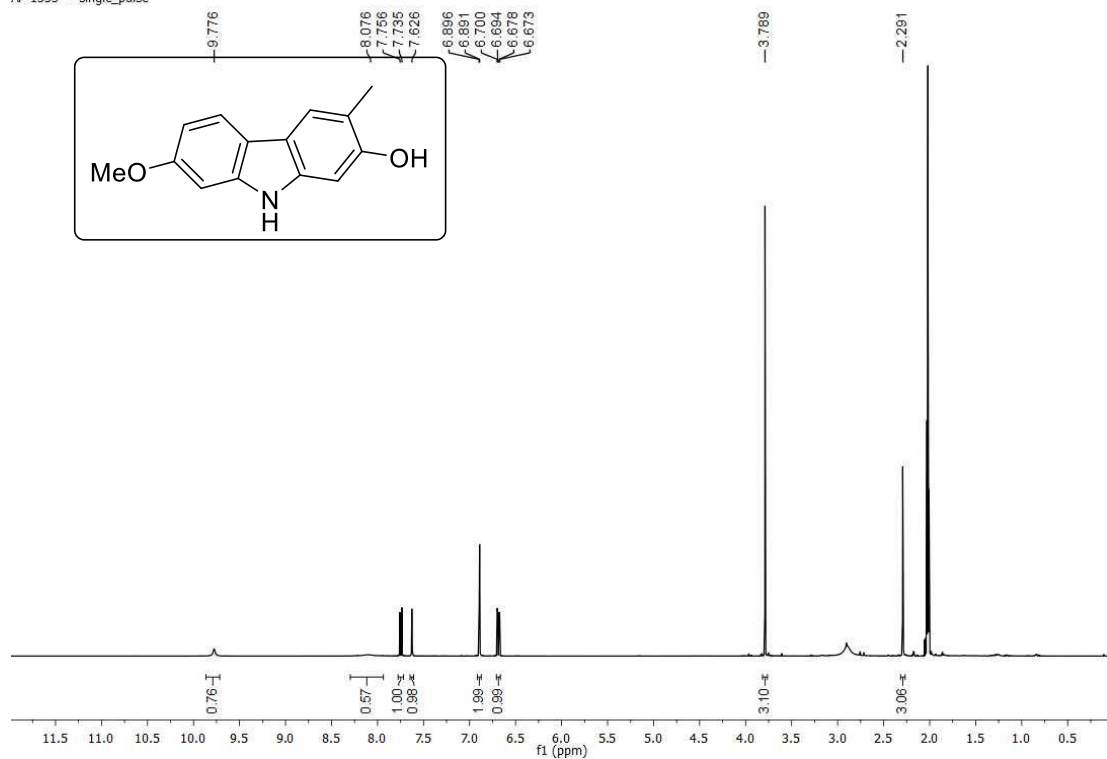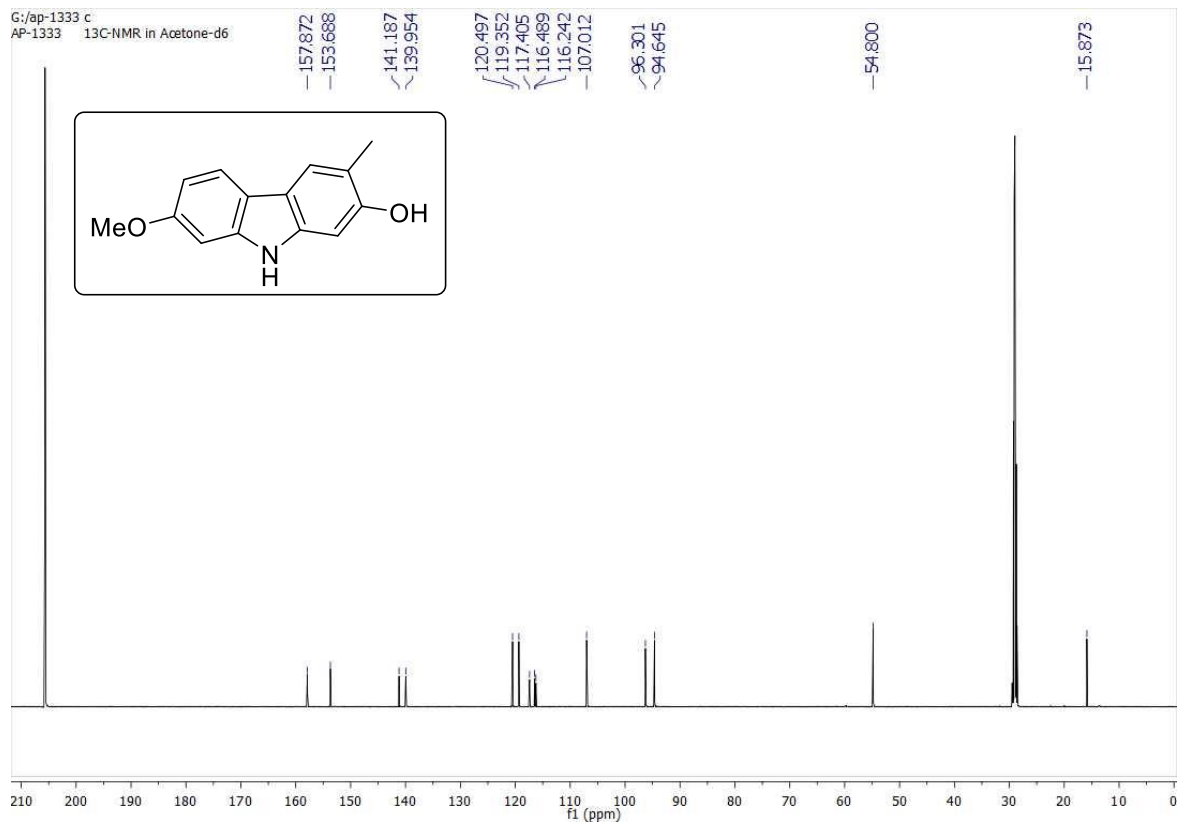

# <sup>1</sup>H NMR and <sup>13</sup>C NMR Spectra of compound 15

RJ-1216/9 — AP-1341 <sup>1</sup>H-NMR in Acetone-d<sub>6</sub>

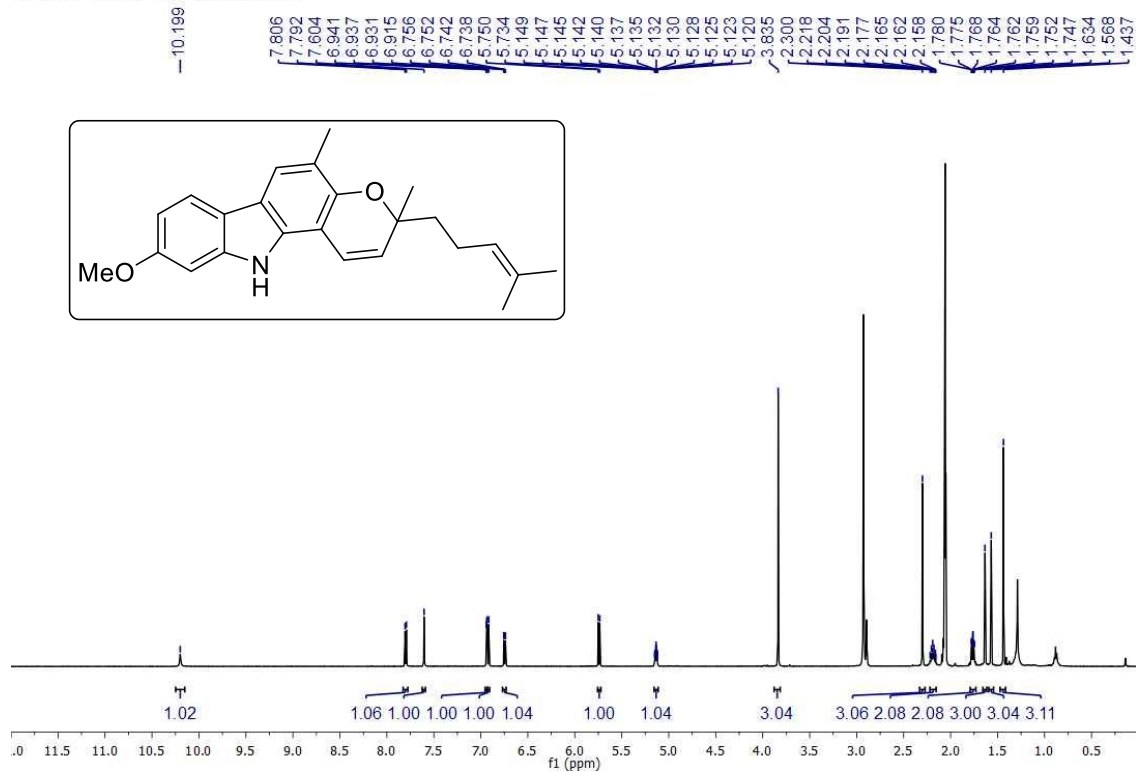

RJ-1216/10 — AP-1341 <sup>13</sup>C-NMR in Acetone-d<sub>6</sub>

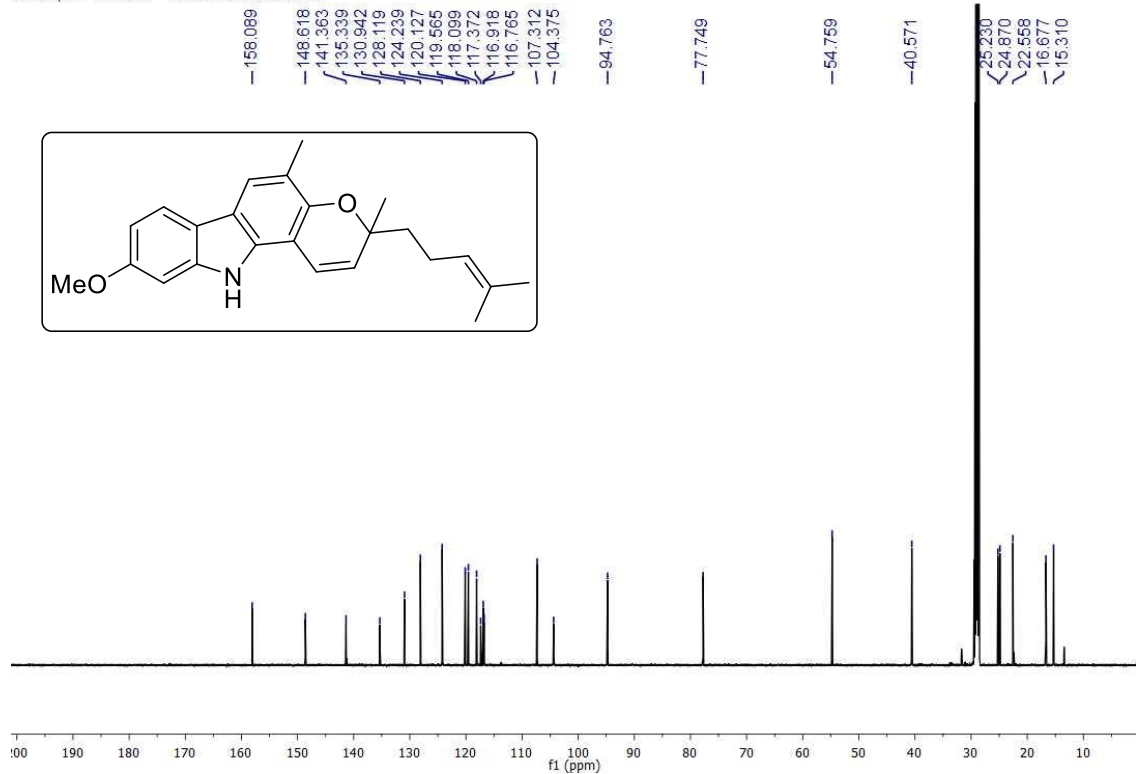

# <sup>1</sup>H NMR and <sup>13</sup>C NMR Spectra of compound 16

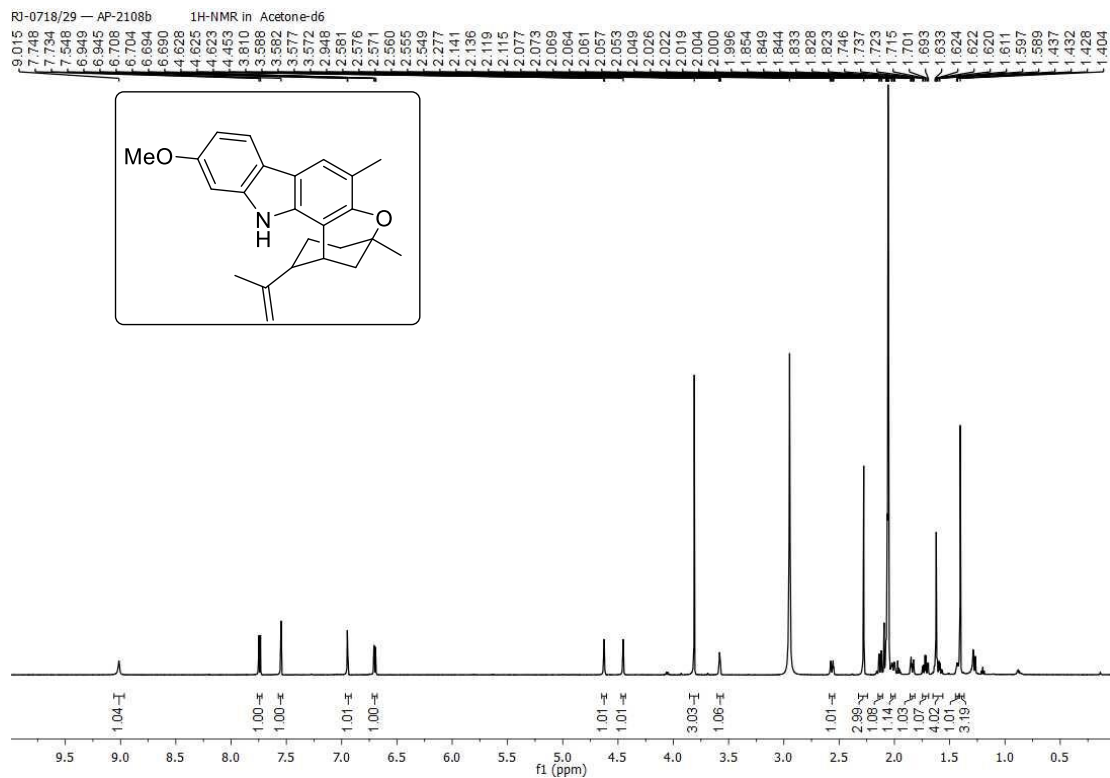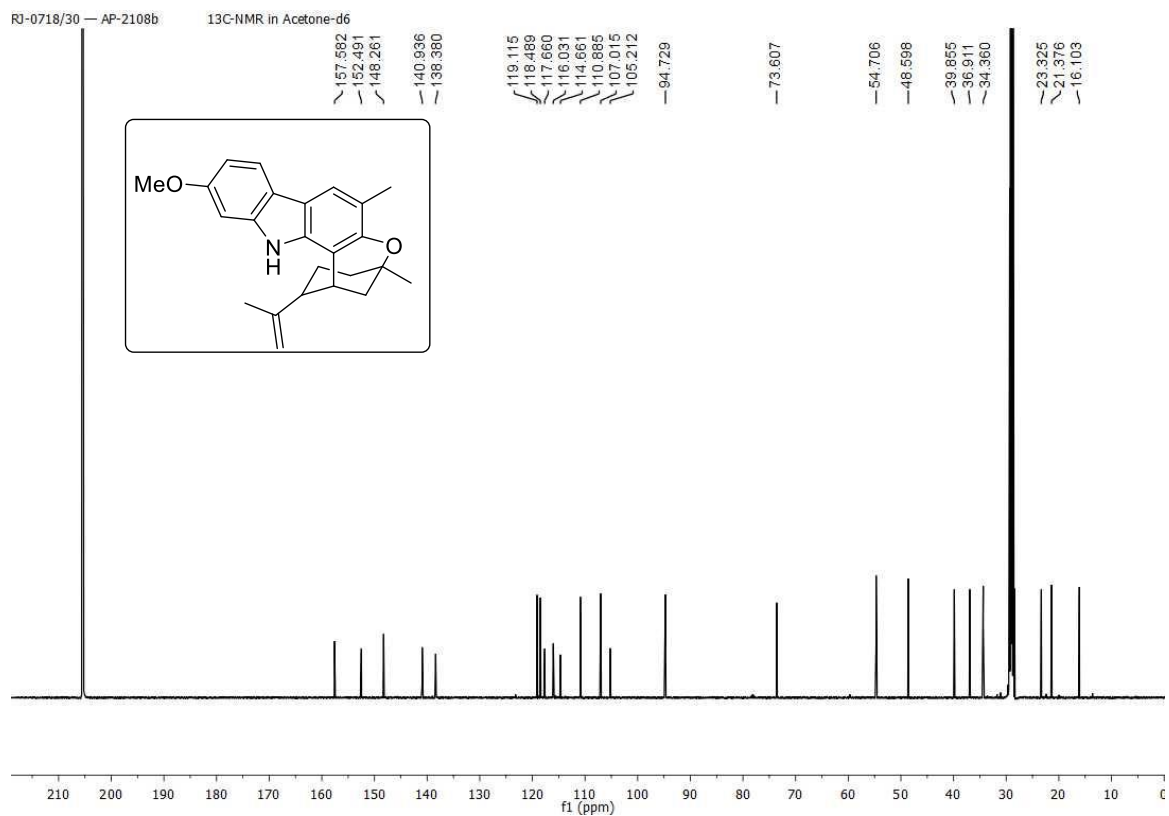

## Scheme S2: Intermolecular Molecular Kinetic Isotopic effect

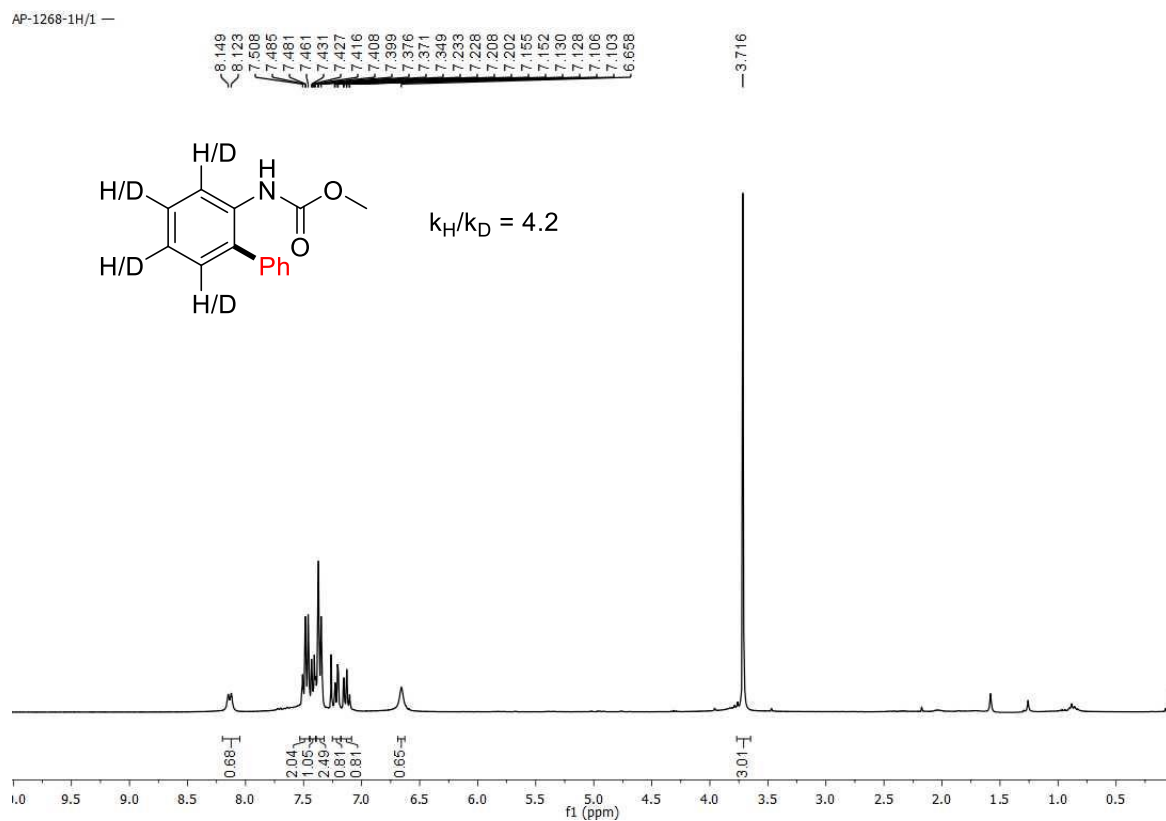

## Scheme S3: GC MS spectra of tempo-adduct product

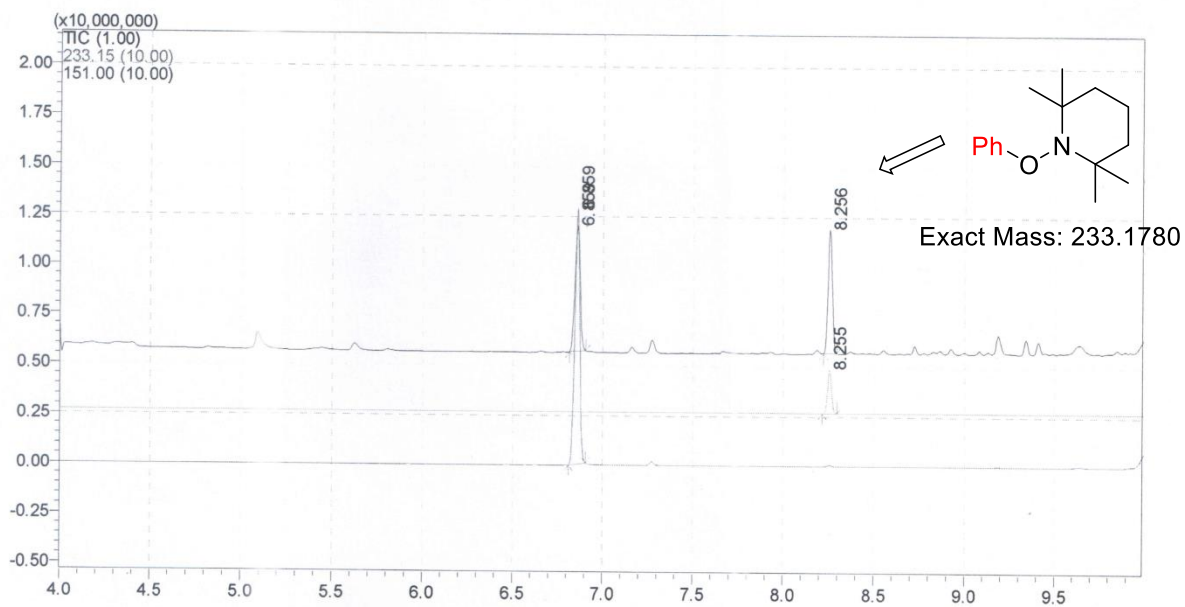

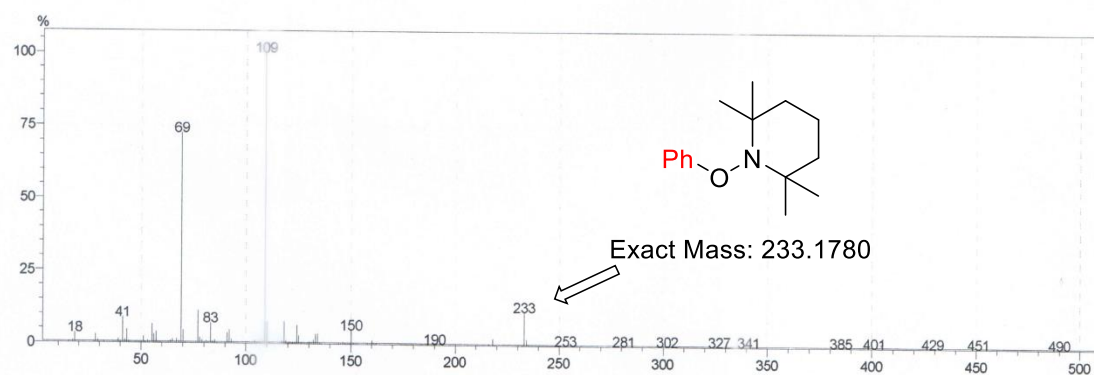

HRMS of TEMPO-adduct product  $C_{15}H_{23}NO$   $[M+H]^+$ : Exact Mass: 234.1858; found: 234.1852.

## References

- (1) Krahl, M. P.; Jager, A.; Krause, T.; Knölker, H. J. First total synthesis of the 7-oxygenated carbazole alkaloids clauszoline-K, 3-formyl-7-hydroxycarbazole, clausine M, clausine N and the anti-HIV activesiamenol using a highly efficient palladium-catalyzed approach. *Org. Biomol. Chem.* **2006**, *4*, 3215-3219.
- (2) Jung, M. E.; Lyster, M. A. Quantitative dealkylation of alkyl ethers via treatment with trimethylsilyl iodide. A new method for ether hydrolysis. *J. Org. Chem.* **1977**, *42*, 3761-3764.
- (3) Fuji, K.; Kawabata, T.; Fujita, E. Hard Acid and Soft Nucleophile System. IV. Removal of Benzyl Protecting Group with Boron Trifluoride Etherate and Dimethyl Sulfide. *Chem. Pharm. Bull.* **1980**, *28*, 3662-3664.
- (4) Vickery, E. H.; Pahler, L. F.; Eisenbraun, E. J. Selective O-demethylation of catechol ethers. Comparison of boron tribromide and iodotrimethylsilane. *J. Org. Chem.* **1979**, *44*, 4444-4446.
- (5) Negi, A. S.; Chattopadhyay, S. K.; Srivastava, S.; Bhattacharya, A. K.; A Simple Regioselective Demethylation of p-Aryl Methyl Ethers Using Aluminum Chloride-Dichloromethane System. *Synth. Commun.* **2005**, *35*, 15-20.
- (6) Tian, J.; Sang, D. Application of aluminum triiodide in organic synthesis. *ARKIVOC* **2015**, 446-493.
